# Supplementary material for: A specialized bone marrow microenvironment for fetal haematopoiesis
Source: PubMed Central journal article supplement (PMC8921288; doi:10.1038/s41467-022-28775-x), 2022-03-14
Supplement: 41467_2022_28775_MOESM1_ESM.pdf [file 41467_2022_28775_MOESM1_ESM.pdf]

# Supplementary Information for

## A specialized bone marrow microenvironment for fetal haematopoiesis

Yang Liu<sup>#\*</sup>, Qi Chen<sup>#</sup>, Hyun-Woo Jeong<sup>#</sup>, Bong Ihn Koh, Emma C. Watson, Cong Xu, Martin Stehling, Bin Zhou, Ralf H. Adams<sup>\*</sup>

\*Corresponding author Emails:

ralf.adams@mpi-muenster.mpg.de

yangl005@scut.edu.cn

The Supplementary Information contains the following data

- Supplementary Tables

Supplementary Table 1. Summary of genetic mouse models used in this study

Supplementary Table 2. Summary of primary antibodies used in this study

- Supplementary Figures

Supplementary Fig. 1 | Vascular development in fetal BM.

Supplementary Fig. 2 | Fetal BM development and properties of c-Kit hematopoietic cells.

Supplementary Fig. 3 | Additional data for scRNA-seq analysis of all cells and HSPCs.

Supplementary Fig. 4 | Additional analysis of BMSCs

Supplementary Fig. 5 | Analysis of ECs and relationship between arteries and HSPCs.

Supplementary Fig. 6 | scRNA-seq analysis of embryonic and adult ECs

Supplementary Fig. 7 | Additional analysis of  $Wls^{i\Delta Bmx}$  mutants.

Supplementary Fig. 8 | Analysis of  $Wls^{i\Delta Bmx}$  mutant liver.

Supplementary Fig. 9 | Normal hematopoietic cell expansion and nerve extension in  $Wls^{i\Delta Myh11}$  mutants.

Supplementary Fig. 10 | Femoral nerves are not required for fetal HSPC development.

Supplementary Fig. 11 | Additional analysis of *Ctnnb1* inactivation in hematopoietic cells.

Supplementary Fig. 12 | Effect of IWR-1 on HSPCs.

Supplementary Fig. 13 | Additional data about the effect of Wnt on HSPCs.

**Supplementary Table S1. Summary of genetic mouse models used in this study**

| Full Name                           | Short name                               | Inducible | Source                               | Purpose                                                                                               |
|-------------------------------------|------------------------------------------|-----------|--------------------------------------|-------------------------------------------------------------------------------------------------------|
| <i>Rosa26-mT/mG</i>                 | <i>R26-mTmG</i>                          |           | Jackson Lab.<br>Stock No.<br>007676  | Cre reporter, labeling of Cre-recombined cells and their descendants                                  |
| <i>Vav1-Cre</i>                     | -                                        | No        | Jackson Lab.<br>Strain No.<br>008610 | Labeling of and gene knockout in hematopoietic cells and their descendants                            |
| <i>Lepr-Cre</i>                     | -                                        | No        | Jackson Lab.<br>Strain No.<br>008320 | Labeling of and gene knockout in LepR <sup>+</sup> stromal cells and their descendants                |
| <i>Wnt1-Cre</i>                     | -                                        | No        | Jackson Lab.<br>Strain No.<br>007807 | Labeling of and gene knockout in nerve and their descendants                                          |
| <i>Bmx-CreERT2</i>                  | -                                        | Yes       | generated by Adams group             | Labeling of and gene knockout arterial endothelial cells and their descendants                        |
| <i>Myh11-CreERT2</i>                | -                                        | Yes       | Jackson Lab.<br>Stock No.<br>019079  | Labeling of and gene knockout vascular smooth muscle cells and their descendants                      |
| <i>Kit-CreERT</i>                   |                                          | Yes       | generated by Bin Zhou, Shanghai      | Labeling of and gene knockout c-Kit <sup>+</sup> cells and their descendants                          |
| <i>Wntless floxed</i>               | <i>Wls</i>                               |           | Jackson Lab.<br>Stock No.<br>012888  | Conditional knockout of <i>Wntless</i> to block Wnt secretion from Cre <sup>+</sup> cells             |
| <i>Ctnnb1 floxed</i>                |                                          |           | Jackson Lab.<br>Stock No.<br>004152  | Conditional knockout of <i>Ctnnb1</i>                                                                 |
| <i>Bmx-CreERT2<br/>Wntless</i>      | <i>Wls<sup>i</sup>Δ<sup>Bmx</sup></i>    | Yes       | see above                            | Conditional knockout of <i>Wntless</i> to block Wnt secretion from arterial endothelial cells         |
| <i>Myh11-CreERT2<br/>Wntless</i>    | <i>Wls<sup>i</sup>Δ<sup>Myh11</sup></i>  | Yes       | see above                            | Conditional knockout of <i>Wntless</i> to block Wnt secretion from vascular smooth muscle cells       |
| <i>Wnt1-Cre Ctnnb1</i>              | <i>Ctnnb1<sup>ΔWnt1</sup></i>            | No        | see above                            | Conditional knockout of <i>Ctnnb1</i> in nerve                                                        |
| <i>Vav1-Cre Ctnnb1</i>              | <i>Ctnnb1<sup>ΔVav1</sup></i>            | No        | see above                            | Conditional knockout of <i>Ctnnb1</i> in hematopoietic cells                                          |
| <i>Kit-CreER Ctnnb1</i>             | <i>Ctnnb1<sup>i</sup>Δ<sup>Kit</sup></i> | Yes       | see above                            | Conditional knockout of <i>Ctnnb1</i> in c-Kit <sup>+</sup> hematopoietic cells and their descendants |
| <i>Bmx-CreERT2<br/>Rosa26-mT/mG</i> | <i>Bmx-mTmG</i>                          | Yes       | see above                            | Reporter and genetic lineage tracing of arterial endothelial cells and their descendants              |
| <i>Lepr-Cre Rosa26-mT/mG</i>        | <i>Lepr-mTmG</i>                         | No        | see above                            | Reporter and genetic lineage tracing of LepR <sup>+</sup> stromal cells and their descendants         |

|                  |  |  |                                     |                                                                                      |
|------------------|--|--|-------------------------------------|--------------------------------------------------------------------------------------|
| <i>Efnb2-GFP</i> |  |  | Jackson Lab.<br>Stock No.<br>007843 | Genetic labelling of<br>EphrinB2+ arterial endothelial<br>cells with nuclear H2B-GFP |
|------------------|--|--|-------------------------------------|--------------------------------------------------------------------------------------|

**Supplementary Table 2 | Summary of primary antibodies used in this study**

| Primary antibodies          | Company        | Catalog     | Dilution                             | Clone   | Usage |
|-----------------------------|----------------|-------------|--------------------------------------|---------|-------|
| Endomucin                   | Santa Cruz     | SC-65495    | 1:100                                | V.7C7   | IHC   |
| CD31                        | R&D            | AF3628      | 1:100                                | -       | IHC   |
| CD31                        | BD pharmingen  | 553370      | 1:100                                | MEC13.3 | IHC   |
| Osterix                     | Abcam          | Ab22552     | 1:800                                | -       | IHC   |
| Caveolin-1                  | Cell signaling | 3238        | 1:100                                | -       | IHC   |
| GFP-Alexa488                | Invitrogen     | A21311      | 1:100                                | -       | IHC   |
| GFP                         | Aveslabs       | GFP-1010    | 1:400                                | -       | IHC   |
| Th                          | Millipore      | AB152       | 1:50                                 | -       | IHC   |
| $\alpha$ SMA-eFluor660      | eBioscience    | 50-9760-82  | 1:50                                 | 1A4     | IHC   |
| $\alpha$ SMA-cy3            | Sigma          | C6198       | 1:100                                | 1A4     | IHC   |
| Synaptophysin               | Abcam          | Ab32594     | 1:50                                 | -       | IHC   |
| Lineage-biotin cocktail     | BD pharmingen  | 559971      | 1:100                                | -       | IHC   |
| c-Kit                       | R&D            | AF1356      | 1:100                                | -       | IHC   |
| c-Kit-FITC                  | Biologend      | 105806      | 1:50                                 | 2B8     | IHC   |
| Tuj1                        | Abcam          | ab107216    | 1:50                                 | -       | IHC   |
| Tuj1-488                    | Biologend      | 657404      | 1:50                                 | AA10    | IHC   |
| TrkA                        | R&D            | AF1056      | 1:100                                | -       | IHC   |
| CyclinD1                    | Cell signaling | 2978        | 1:200                                | 92G2    | IHC   |
| CD150-FITC                  | ThermoFisher   | 11-1501     | 1:100                                | 9D1     | IHC   |
| CD150                       | AbD Serotec    | MCA2274A488 | 1:100                                | 9D1     | IHC   |
| PDGFR $\beta$               | Abcam          | ab32570     | 1:200                                | Y92     | IHC   |
| CD41-biotin                 | ThermoFisher   | eBioMWReg30 | 1:100                                | 13-0411 | IHC   |
| CD48-biotin                 | ThermoFisher   | 13-0481     | 1:100                                | HM48-1  | IHC   |
| Col3a1                      | Novusbio       | NB600-594   | 1:200                                |         | IHC   |
|                             |                |             |                                      |         |       |
| Lineage-biotin cocktail     | BD pharmingen  | 559971      | 20 $\mu$ l per $1 \times 10^6$ cells |         | FACS  |
| Lineage-biotin cocktail-APC | BD pharmingen  | 558074      | 20 $\mu$ l per $2 \times 10^6$ cells |         | FACS  |
| Sca1-FITC                   | eBioscience    | 11-5981-85  | 6 $\mu$ l per $2 \times 10^6$ cells  | D7      | FACS  |
| Sca1-PE-Cy7                 | BD pharmingen  | 558162      | 6 $\mu$ l per $2 \times 10^6$ cells  | D7      | FACS  |
| c-Kit-APC                   | BD pharmingen  | 553356      | 3 $\mu$ l per $2 \times 10^6$ cells  | 2B8     | FACS  |

|                         |               |            |                                        |                  |      |
|-------------------------|---------------|------------|----------------------------------------|------------------|------|
| c-Kit-FITC              | Biolegend     | 105806     | 8 µl per<br>2x10 <sup>6</sup><br>cells | 2B8              | FACS |
| Ter119-APC              | eBioscience   | 17-5921    | 4 µl per<br>1x10 <sup>6</sup><br>cells | Ter-119          | FACS |
| CD45-FITC               | eBioscience   | 11-0451    | 4 µl per<br>1x10 <sup>6</sup><br>cells | 30-F11           | FACS |
| CD45R(B220)-<br>APC     | Invitrogen    | RM2605     | 3 µl per<br>1x10 <sup>6</sup><br>cells | RA3-6B2          | FACS |
| Gr-1-APC                | eBioscience   | 17-5931    | 3 µl per<br>1x10 <sup>6</sup><br>cells | RB6-8C5          | FACS |
| CD11b-APC               | Biolegend     | 101212     | 3 µl per<br>1x10 <sup>6</sup><br>cells | M1/70            | FACS |
| CD11b-FITC              | BD pharmingen | 553310     | 3 µl per<br>1x10 <sup>6</sup><br>cells | M1/70            | FACS |
| CD150-PE                | Biolegend     | 115904     | 4 µl per<br>2x10 <sup>6</sup><br>cells | TC15-<br>12F12.2 | FACS |
| CD48-APC-<br>Cy7        | BD pharmingen | 561242     | 4 µl per<br>2x10 <sup>6</sup><br>cells | HM48-1           | FACS |
| CD34-<br>eFluor450      | eBioscience   | 48-0341    | 4 µl per<br>2x10 <sup>6</sup><br>cells | RAM34            | FACS |
| CD127-PE                | eBioscience   | 12-1271    | 4 µl per<br>2x10 <sup>6</sup><br>cell  | A7R34            | FACS |
| CD16/CD32<br>PE-Cy7     | eBioscience   | 25-0161    | 4 µl per<br>2x10 <sup>6</sup><br>cells | 93               | FACS |
| Ter-119<br>Pacific Blue | Biolegend     | 116232     | 4 µl per<br>1x10 <sup>6</sup><br>cells | Ter-119          | FACS |
| CD45- Pacific<br>Blue   | Biolegend     | 103126     | 4 µl per<br>1x10 <sup>6</sup><br>cells | 30-F11           | FACS |
| CD45.1-FITC             | Invitrogen    | MCD45101   | 4 µl per<br>1x10 <sup>6</sup><br>cells | A20              | FACS |
| CD45.2 Pacific<br>Blue  | Biolegend     | 109820     | 4 µl per<br>1x10 <sup>6</sup><br>cells | 104              | FACS |
| CD45 PE-Cy7             | eBioscience   | 25-0451-82 | 4 µl per<br>1x10 <sup>6</sup><br>cells | 30-F11           | FACS |

|             |                 |             |                                        |        |                   |
|-------------|-----------------|-------------|----------------------------------------|--------|-------------------|
| Ki67-FITC   | Biolegend       | 652410      | 4 µl per<br>1x10 <sup>6</sup><br>cells | 16A8   | FACS              |
| CD71-Biotin | Biolegend       | 113803      | 10 µl per<br>10 <sup>7</sup> cells     | RI7217 | Cell<br>depletion |
| CD117       | Miltenyi Biotec | 130-091-224 | 10µl per<br>10 <sup>7</sup> cells      |        | Cell<br>depletion |
| CD45        | Miltenyi Biotec | 130-052-301 | 10 µl per<br>10 <sup>7</sup> cells     |        | Cell<br>depletion |
| Ter119      | Miltenyi Biotec | 130-049-901 | 10 µl per<br>10 <sup>7</sup> cells     |        | Cell<br>depletion |

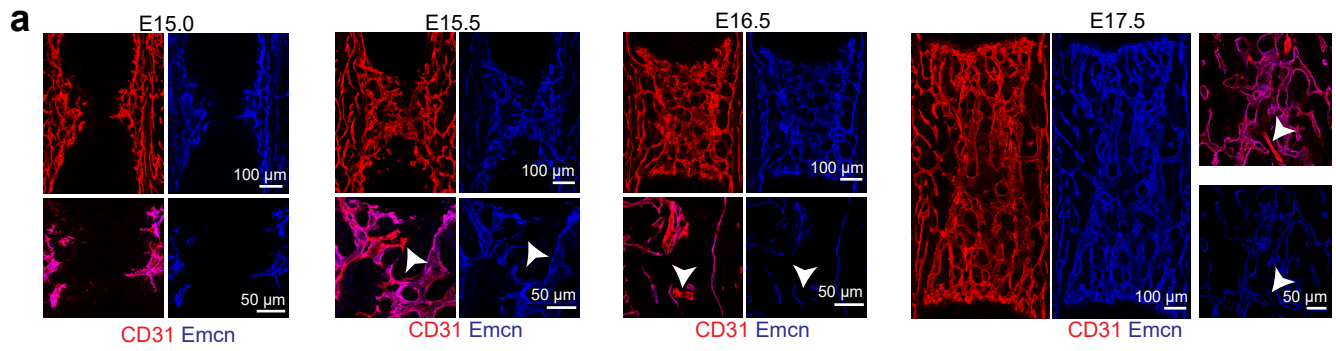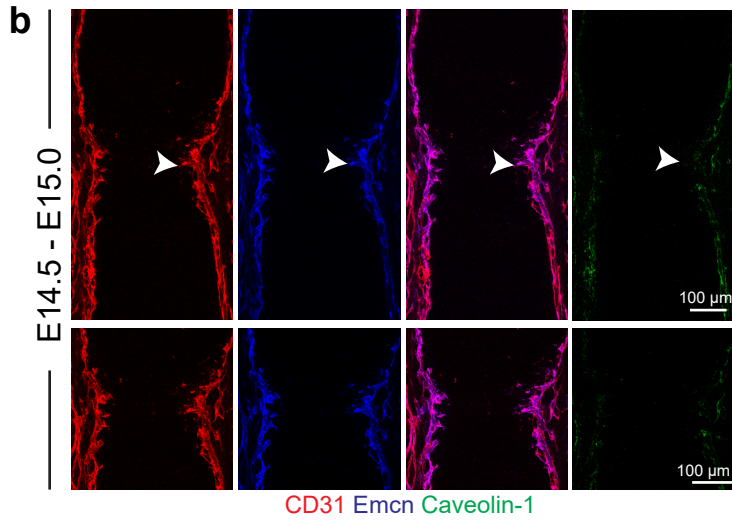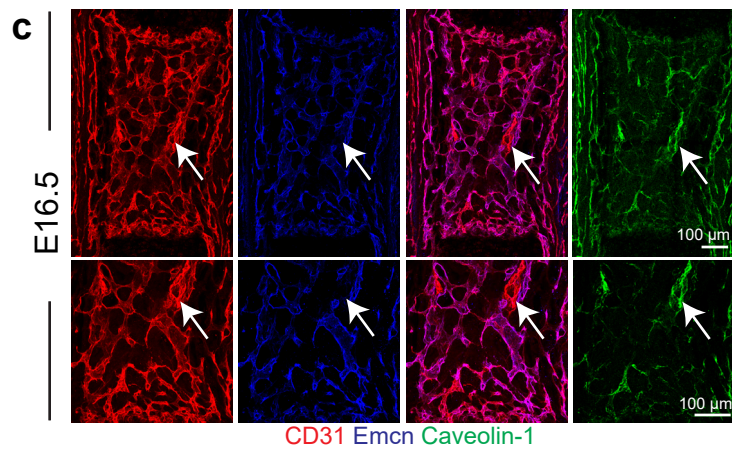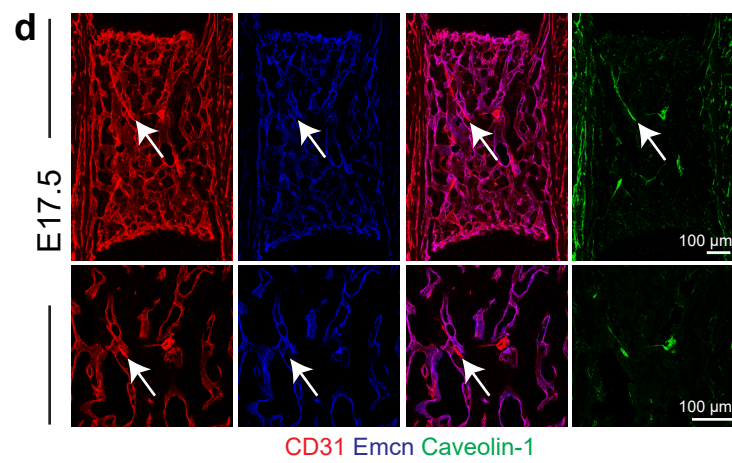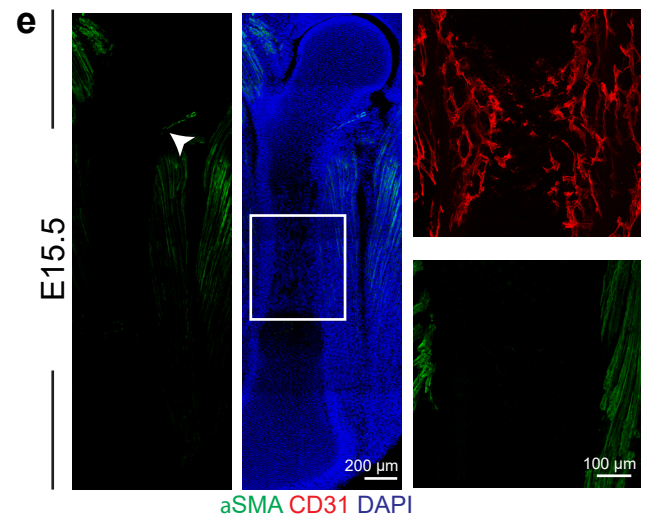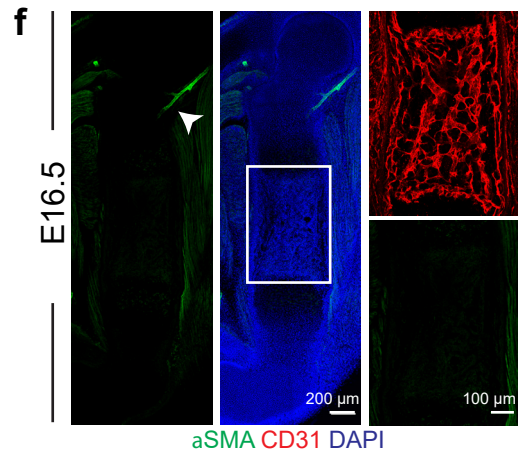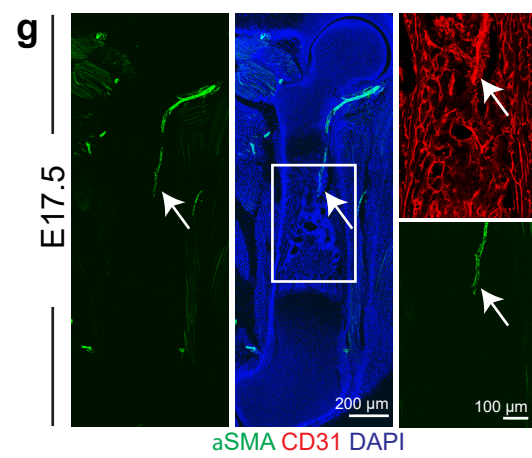

## Supplementary Fig. 1 | Vascular development in fetal BM.

(a) Representative overview and high magnification images of artery development in femur at the indicated stages. Arrowheads mark CD31<sup>+</sup> Emcn<sup>-</sup> arteries.

(b-d) Expression pattern of AEC marker Caveolin-1 together with CD31 and Emcn at E15.0 (b), E16.5 (c), and E17.5 (d). Arrowhead in (b) marks Caveolin-1-negative primitive vascular plexus. Arrows in (c, d) indicate Caveolin-1<sup>+</sup> CD31<sup>+</sup> Emcn<sup>-</sup> AECs.

(e-g) Overview and high magnification images showing  $\alpha$ SMA expression during artery development in femur.  $\alpha$ SMA signals are undetectable at E15.5 (e) and E16.5 (f) but decorate the trochanter artery at E17.5 (g) inside femur. Arrowheads indicate  $\alpha$ SMA signals outside femur, arrows mark the  $\alpha$ SMA<sup>+</sup> trochanter artery penetrating into the bone.



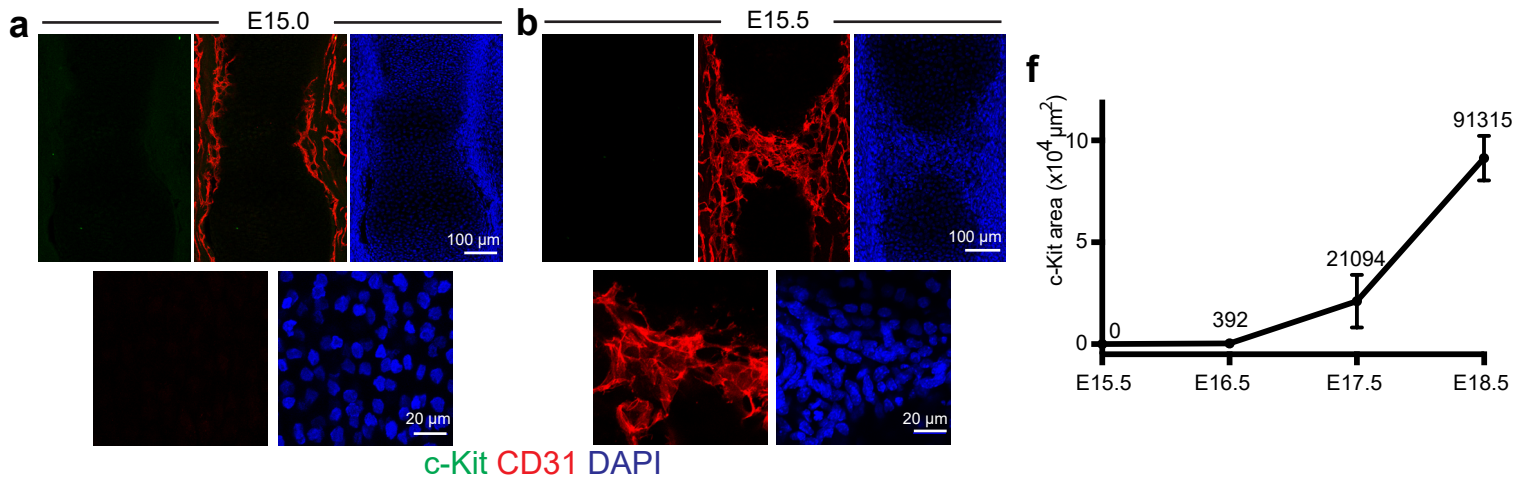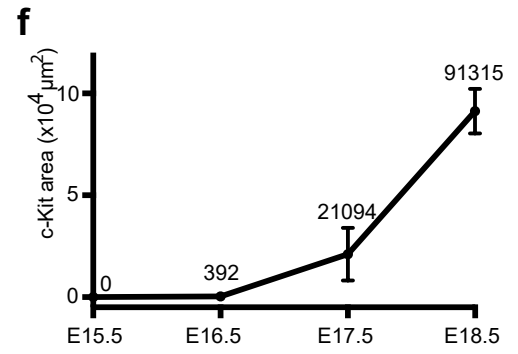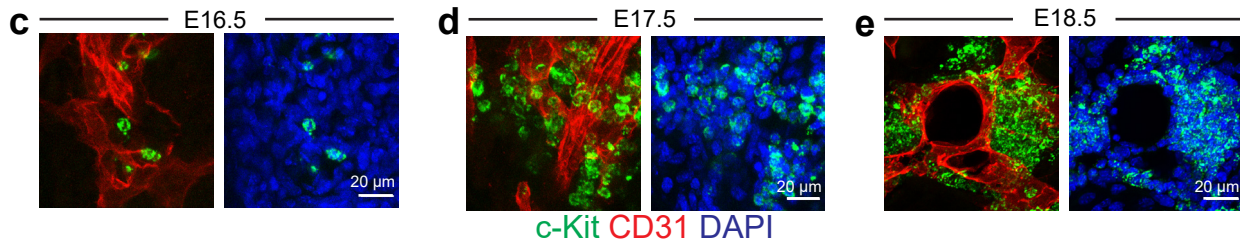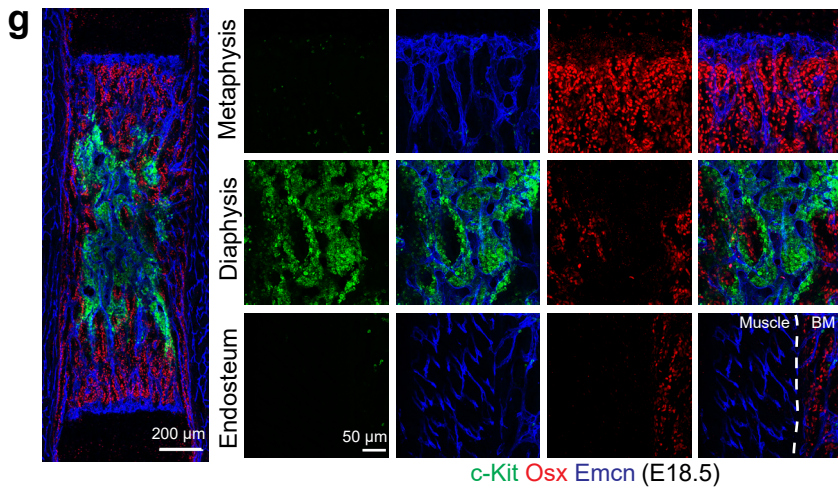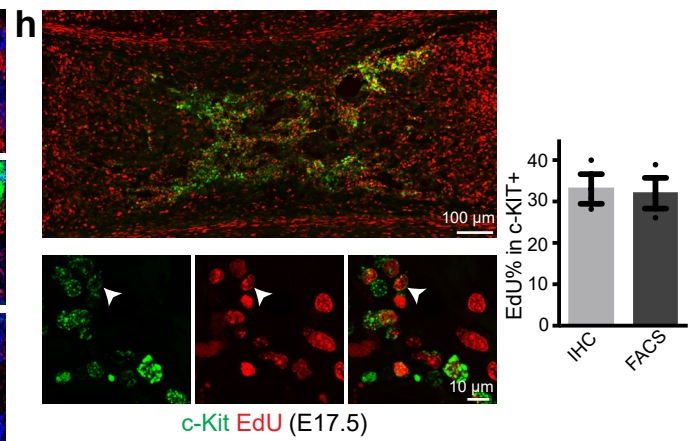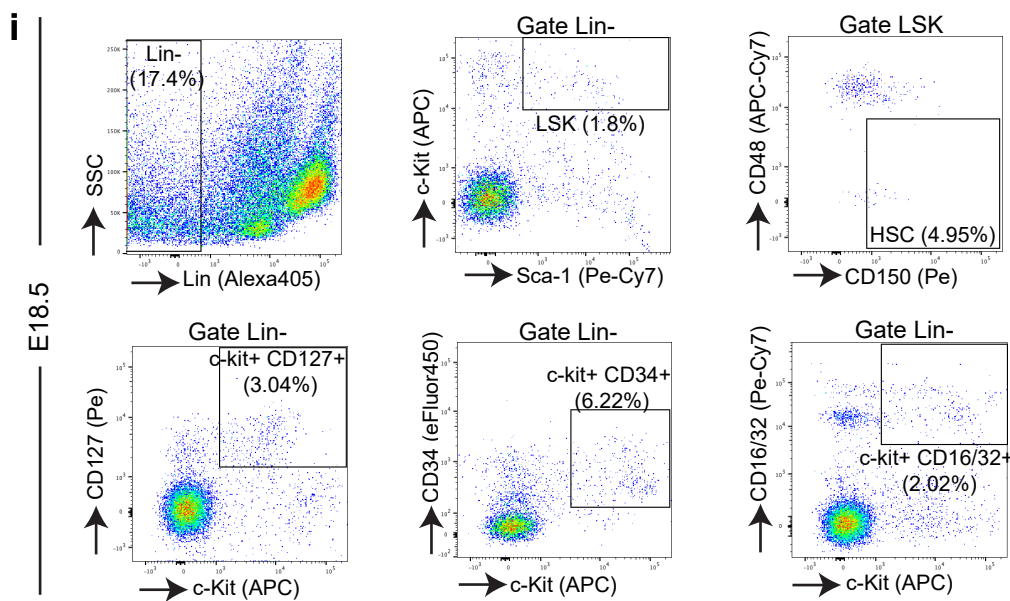

## Supplementary Fig. 2 | Fetal BM development and properties of c-Kit hematopoietic cells.

**(a-e)** Representative overview and high magnification images showing c-Kit<sup>+</sup> cells in femoral BM at E15.0 (a), E15.5 (b), E16.5 (c), E17.5(d), and E18.5 (e).

**(f)** Quantification of c-Kit<sup>+</sup> cell covered area in femur at different developmental stages. Numbers indicate average value (E16.5 N=3; E15.5, E17.5, E18.5 N=4 embryos for each stage). Error bars, mean±s.e.m.

**(g)** Representative overview and high magnification images of c-Kit<sup>+</sup> cell distribution in femur at E18.5.

**(h)** Representative overview and high magnification images of c-Kit together with EdU signal in E17.5 BM (arrowhead marks c-Kit<sup>+</sup> EdU<sup>+</sup> cell). Quantification of EdU% in c-Kit cells by immunostaining and FACS. IHC=3, FACS=3. Error bars, mean±s.e.m.

**(i)** Representative FACS gating of Lin<sup>-</sup>, LSK, HSC, Lin<sup>-</sup> c-Kit<sup>+</sup> CD127<sup>+</sup>, Lin<sup>-</sup> c-Kit<sup>+</sup> CD34<sup>+</sup>, Lin<sup>-</sup> c-Kit<sup>+</sup> CD16/32<sup>+</sup> cells.

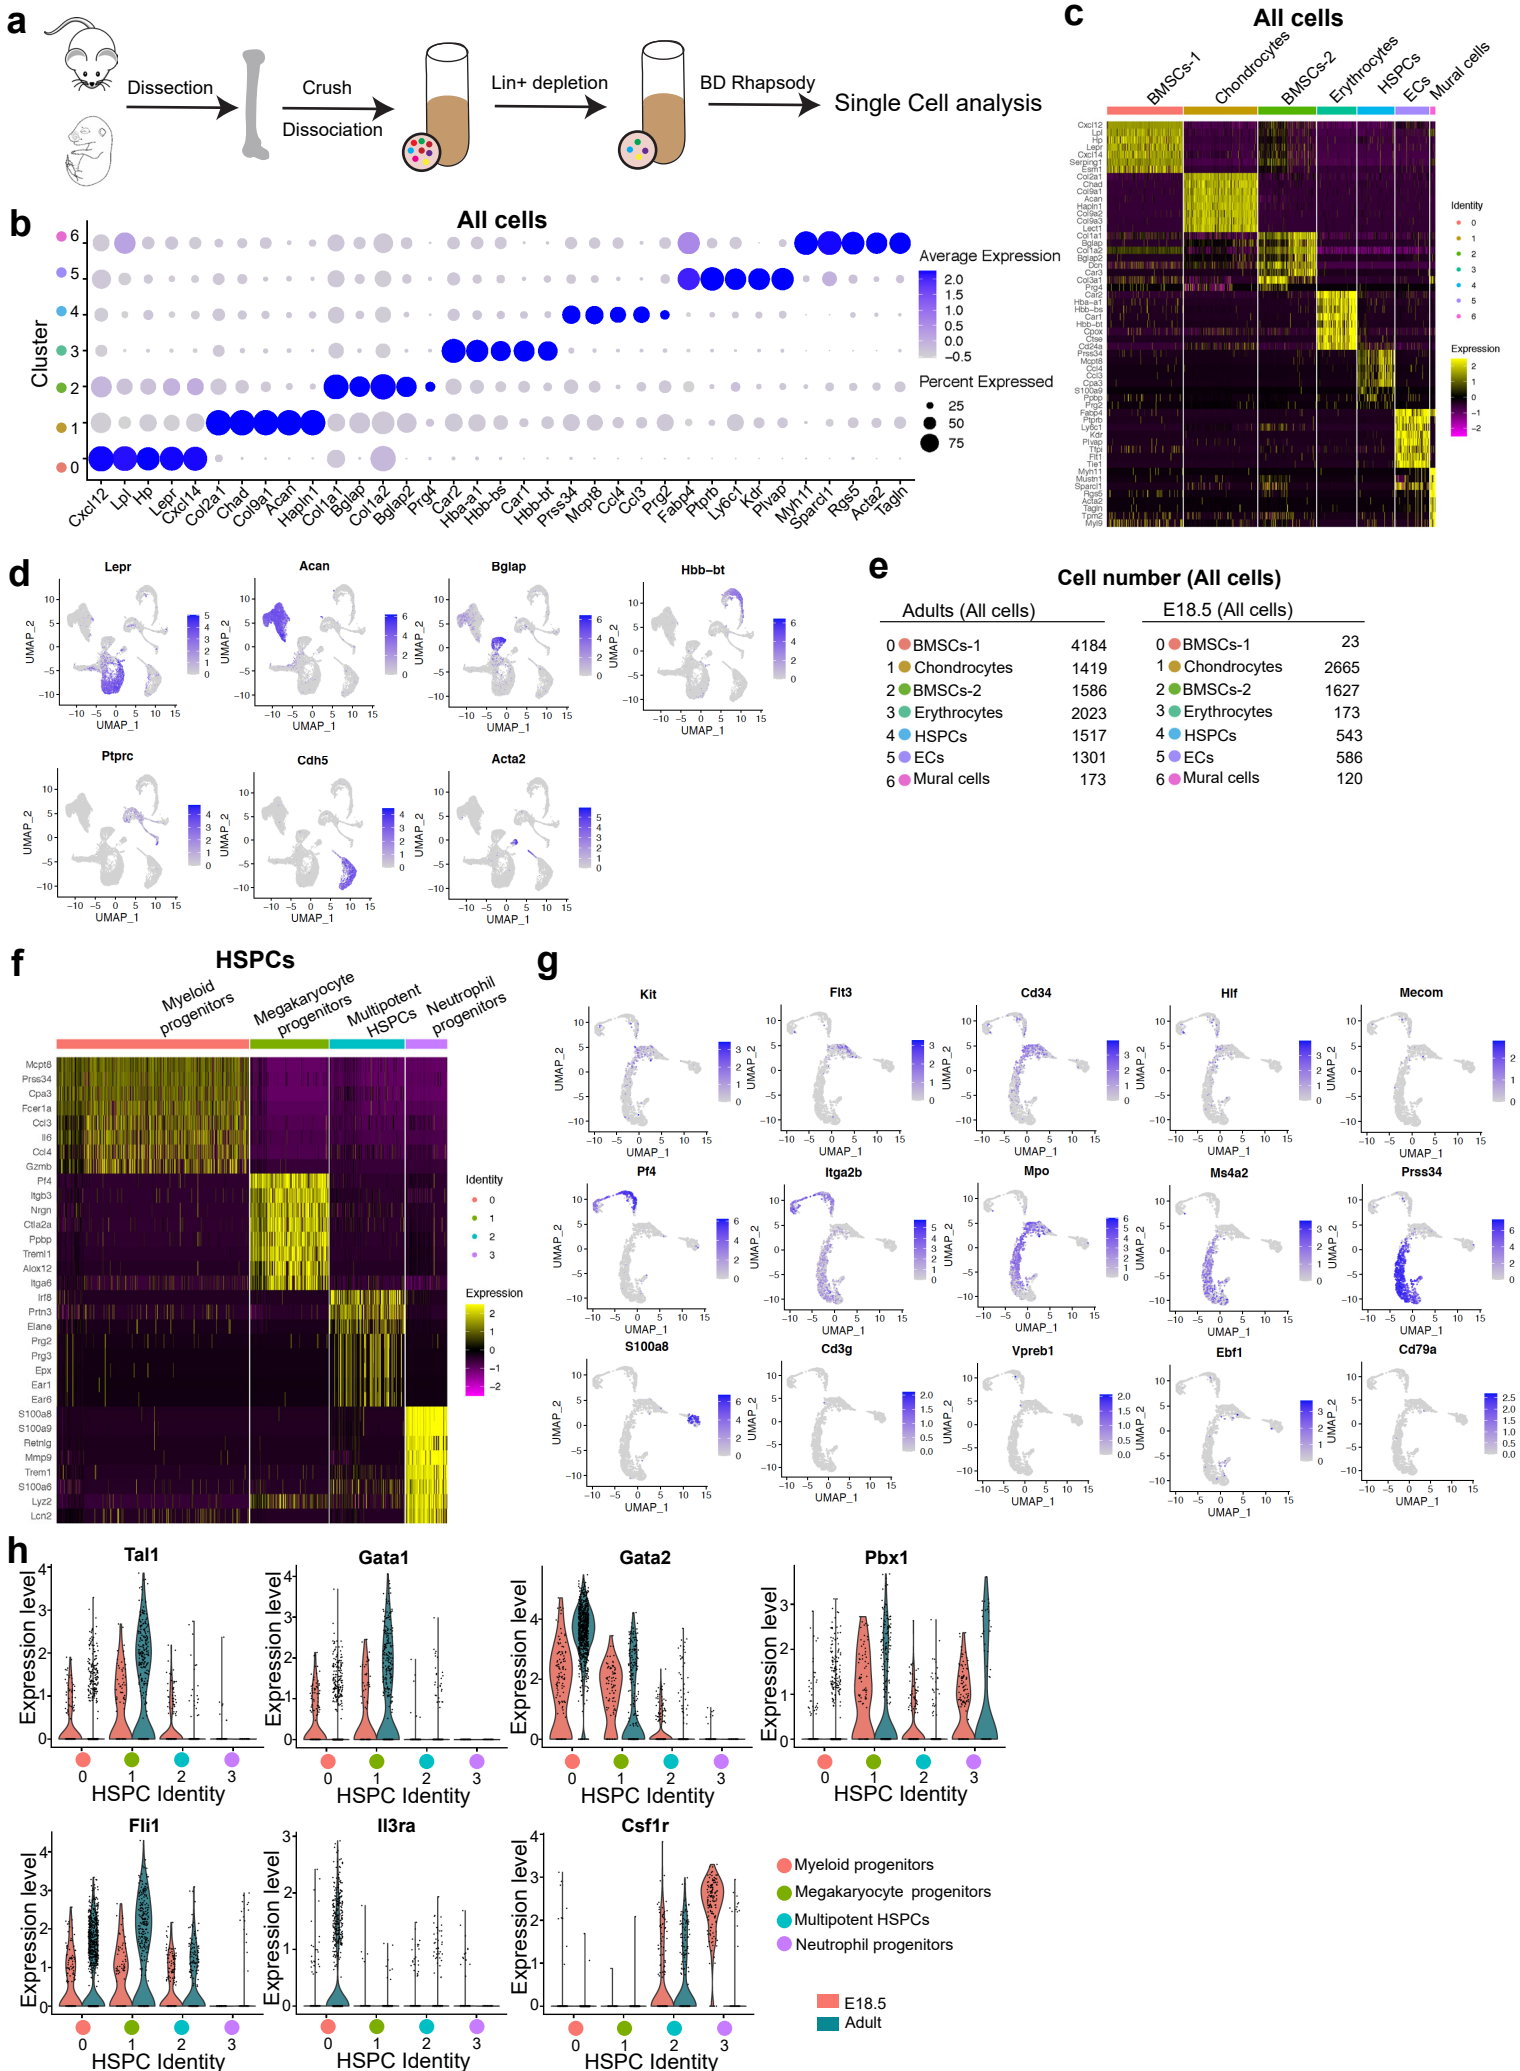

**Supplementary Fig. 3 | Additional data for scRNA-seq analysis of all cells and HSPCs.**

**(a)** Scheme showing magnetic separation for the depletion of mature hematopoietic cells prior to scRNA-seq analysis.

**(b)** Dot plot showing the top 5 markers for each cluster in all cells. Dot size represents percentage of cells where the gene is detected, color indicates average expression level of the gene in each cluster.

**(c)** Heat map showing the top 8 markers for each cluster in all cells.

**(d)** UMAP plots showing distribution of selected markers in all cells. Color represents relative expression level.

**(e)** Quantification of cell number in each cluster.

**(f)** Top 8 differentially expressed genes in each HSPC subcluster.

**(g)** UMAP plots showing distribution of selected markers in each HSPC cluster. Color represents relative expression level.

**(h)** Violin plots showing expression of important transcription factors and receptors in each HSPC subcluster at E18.5 or in adult.

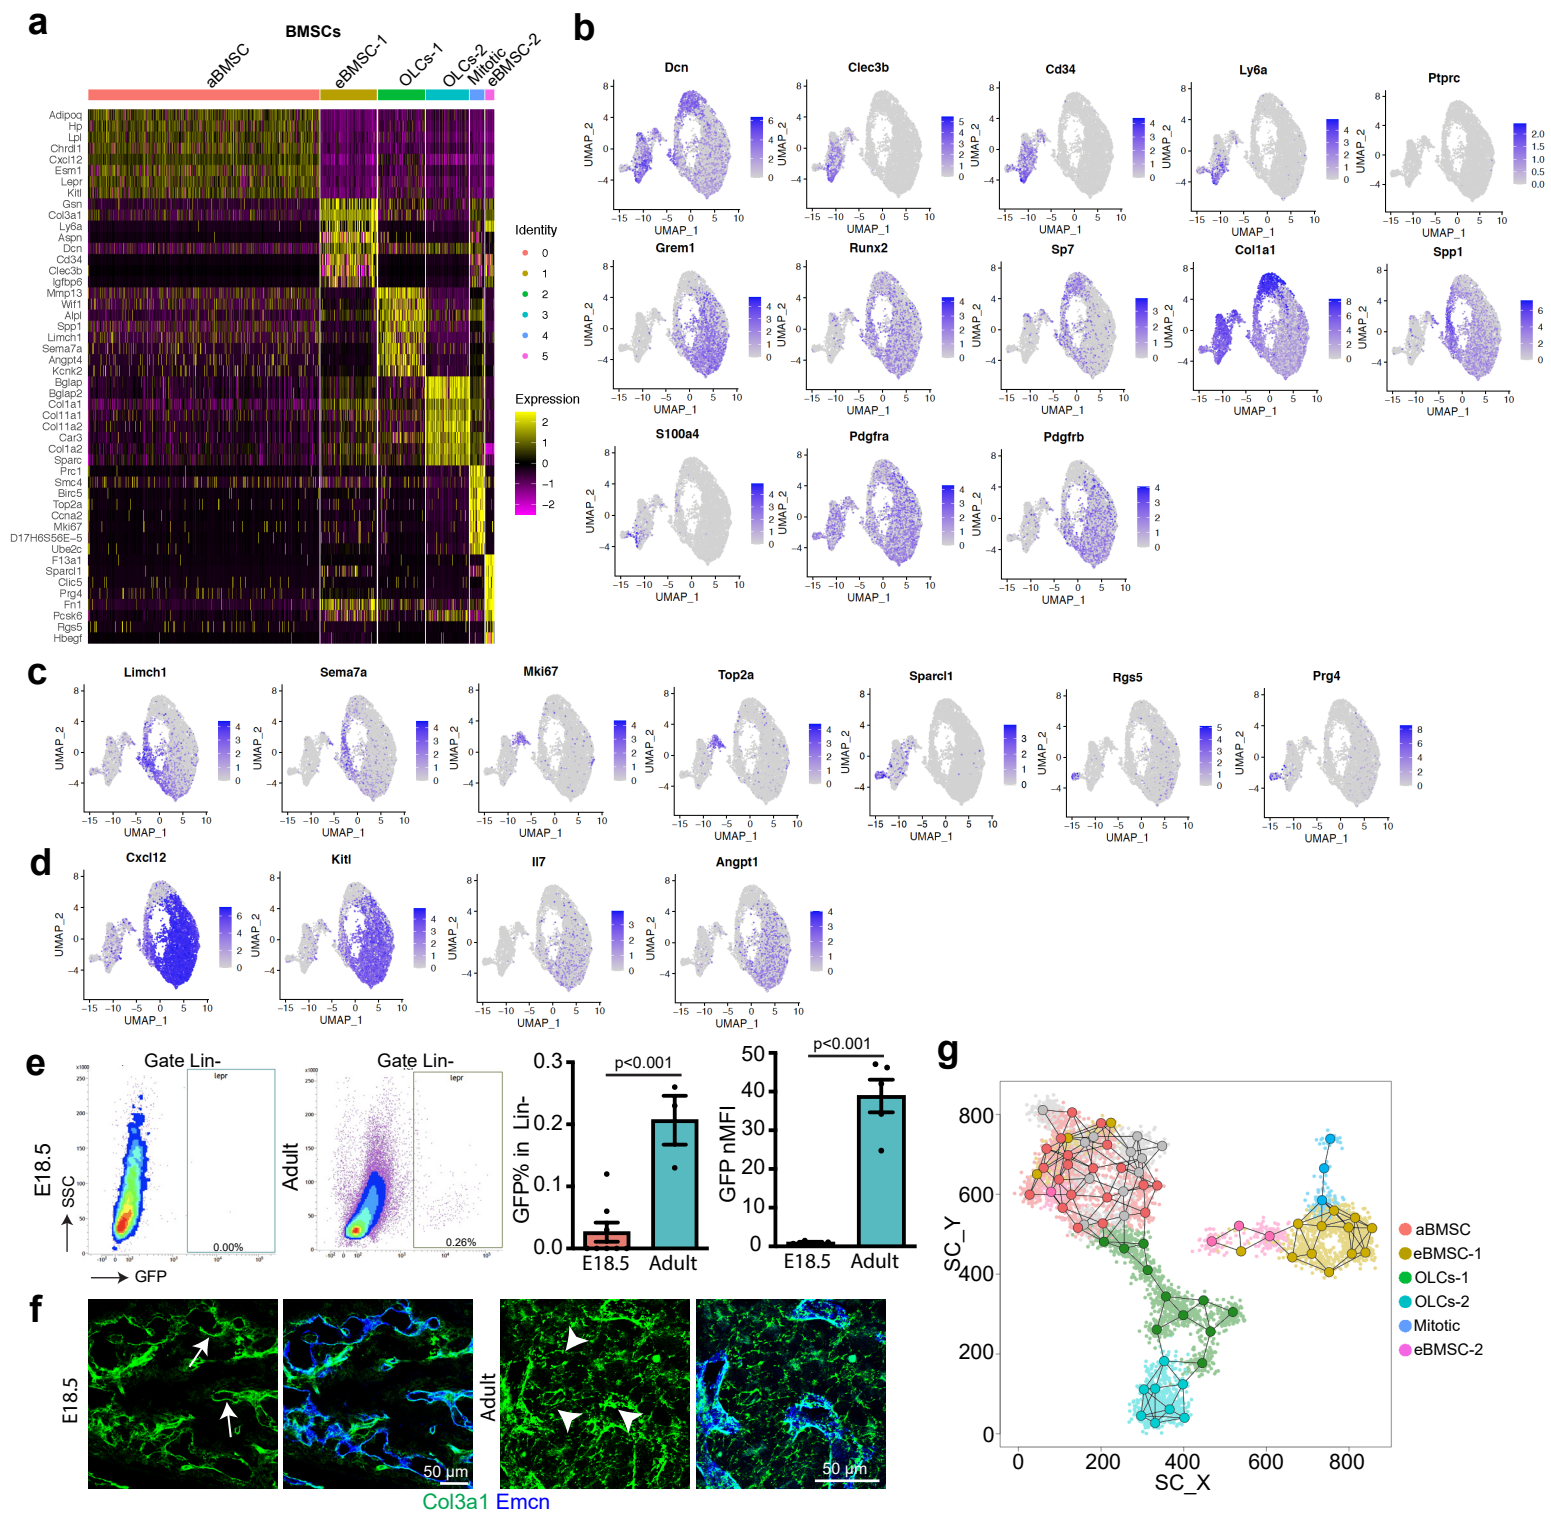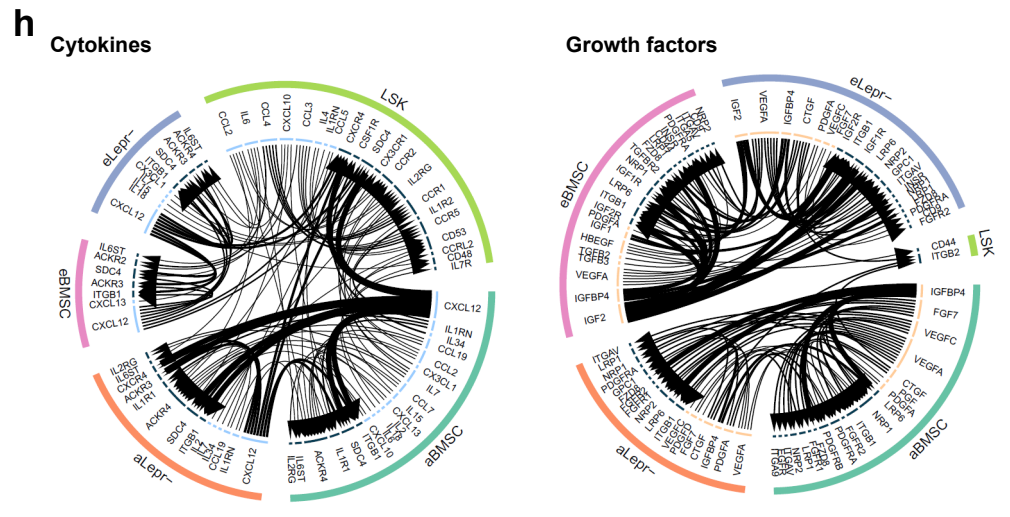

#### Supplementary Fig. 4 | Additional analysis of BMSCs

(a) Heat map showing the top 8 markers for each BMSC subcluster.

(b-d) UMAP plots showing distribution of additional markers and HSPC-supporting factors in BMSC cluster. Color represents relative expression level.

(e) Representative FACS plot showing GFP<sup>+</sup> (LepR<sup>+</sup>) cells in adult or E18.5 Lin<sup>-</sup> LepR-Cre R26-mTmG BM. Quantification of GFP<sup>+</sup> cell percentage or normalized mean fluorescent intensity (nMFI) of GFP<sup>+</sup> cells. E18.5=8, Adult=3. Error bars, mean±s.e.m. Two-tailed Student's t test.

(f) High magnification images showing Col3a1 immunostaining together with the EC marker Emcn in E18.5 or adult BM. Arrows indicate vessel-associated Col3a1 signal in fetal BM, arrow-heads mark Col3a1<sup>+</sup> reticular fibres in adult BM.

(g) Metacell analysis showing interrelation of BMSC subclusters.

(h) Interactome analysis between multipotent HSPCs and different BMSC clusters. The direction of arrows indicates potential interaction, width of line and arrow represent relative gene expression level.

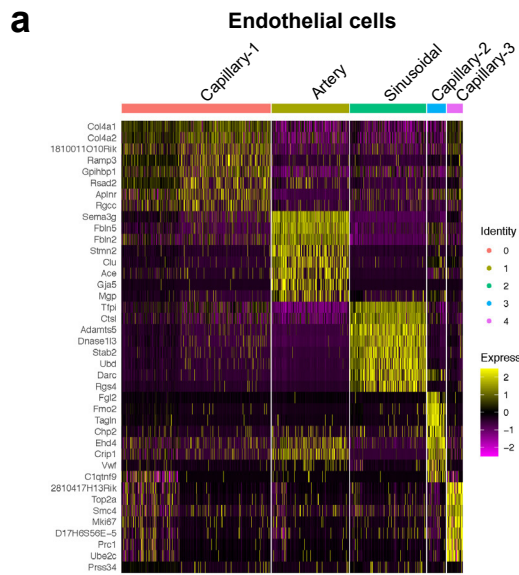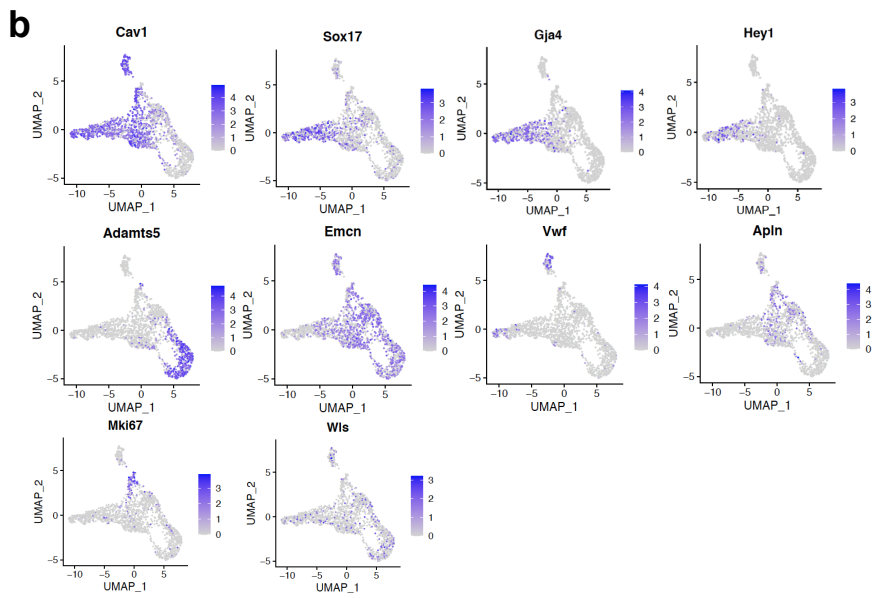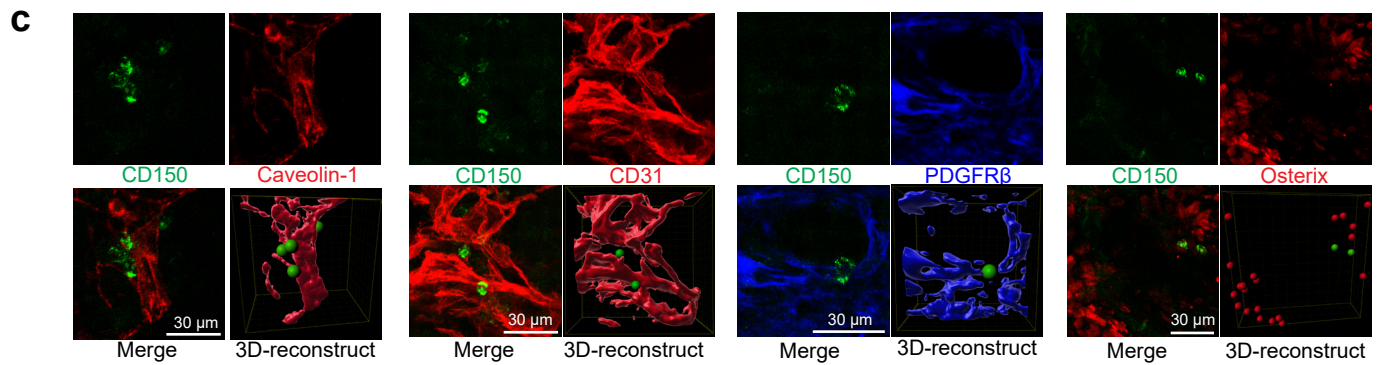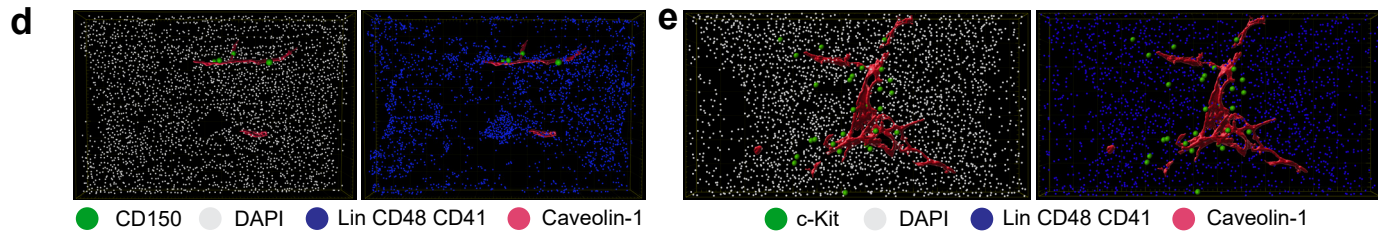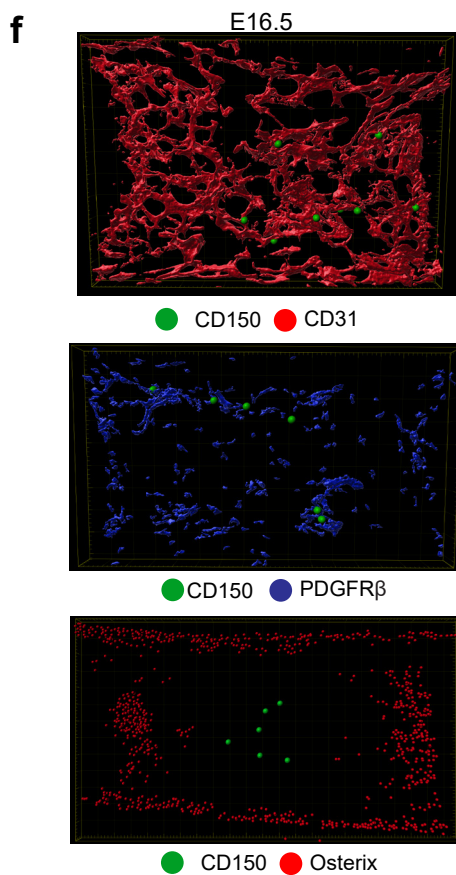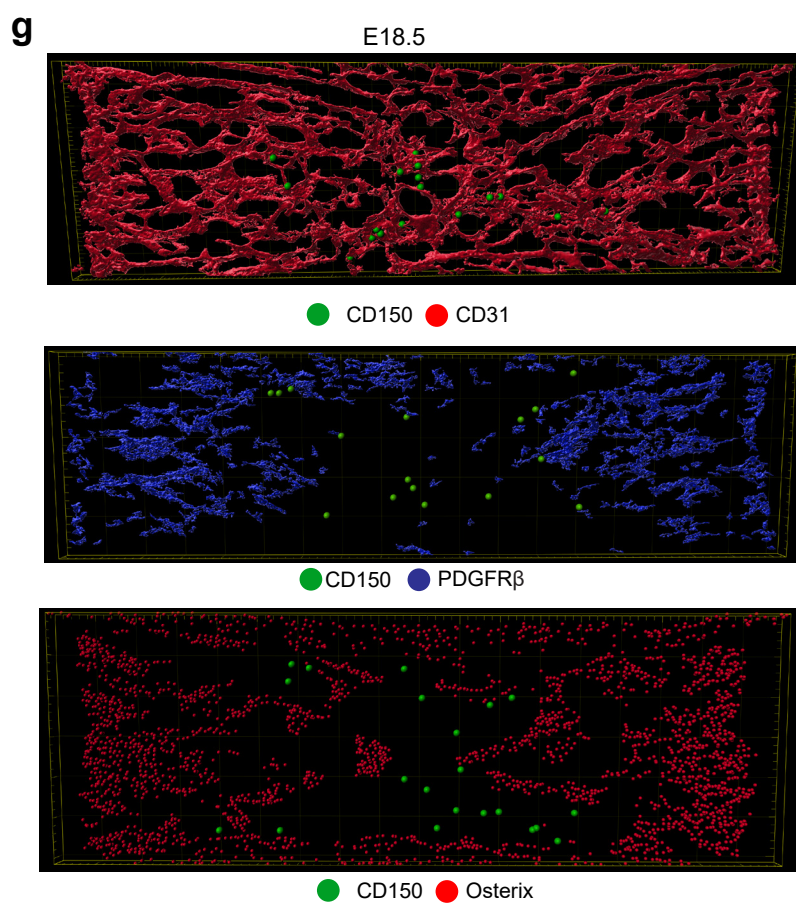

## Supplementary Fig. 5 | Analysis of ECs and relationship between arteries and HSPCs.

**(a)** Heatmap showing the top 8 differentially expressed genes in each EC subcluster.

**(b)** UMAP plot showing distribution of selected markers in each EC subclusters. Color represents relative expression level of the gene (RNA).

**(c)** Comparison of projected images and 3D-reconstruction from original confocal images for CD150.

**(d, e)** Representative 3D-reconstruction image for quantification of the distance to caveolin-1<sup>+</sup> arteries for CD150<sup>+</sup>, DAPI<sup>+</sup> or Lin<sup>+</sup> CD48<sup>+</sup> CD41<sup>+</sup> cells (d) or for c-Kit<sup>+</sup>, DAPI<sup>+</sup> and Lin<sup>+</sup> CD48<sup>+</sup> CD41<sup>+</sup> cells (e).

**(f, g)** 3D-reconstruction images showing position of CD150<sup>+</sup> cells relative to CD31<sup>+</sup> ECs, PDGFR $\beta$ <sup>+</sup> stromal cells and Osterix<sup>+</sup> osteoprogenitor cells at E16.5 (f) or at E18.5 (g).



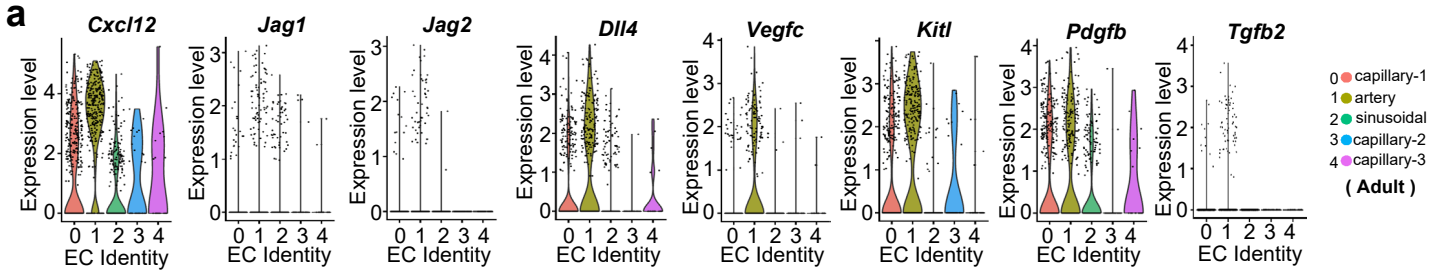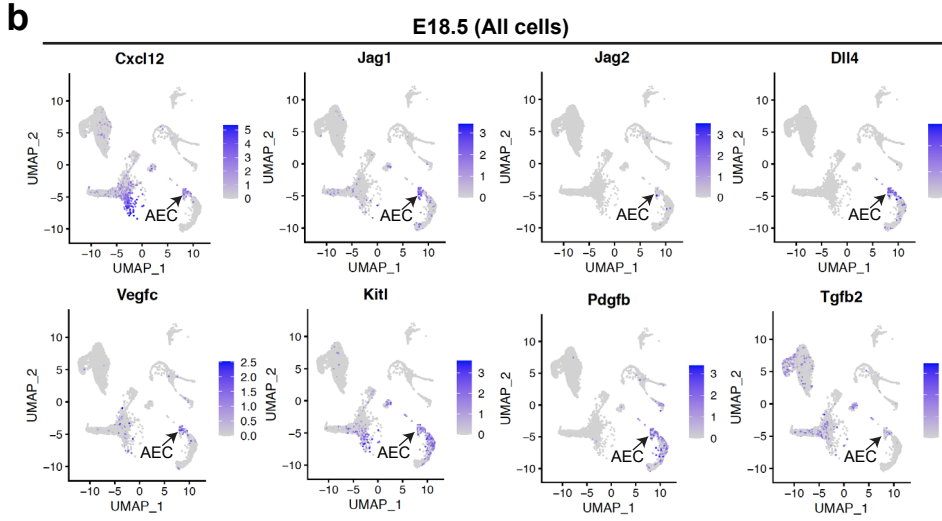

### **Supplementary Fig. 6 | scRNA-seq analysis of embryonic and adult ECs**

**(a)** Violin plots showing expression of angiocrine or HSPC-supporting factors in AECs or other EC subclusters in adult bone.

**(b)** UMAP plots showing distribution of angiocrine or HSPC supportive factor in all E18.5 cells. Arrows indicate location of AECs, colors represent relative gene expression level.

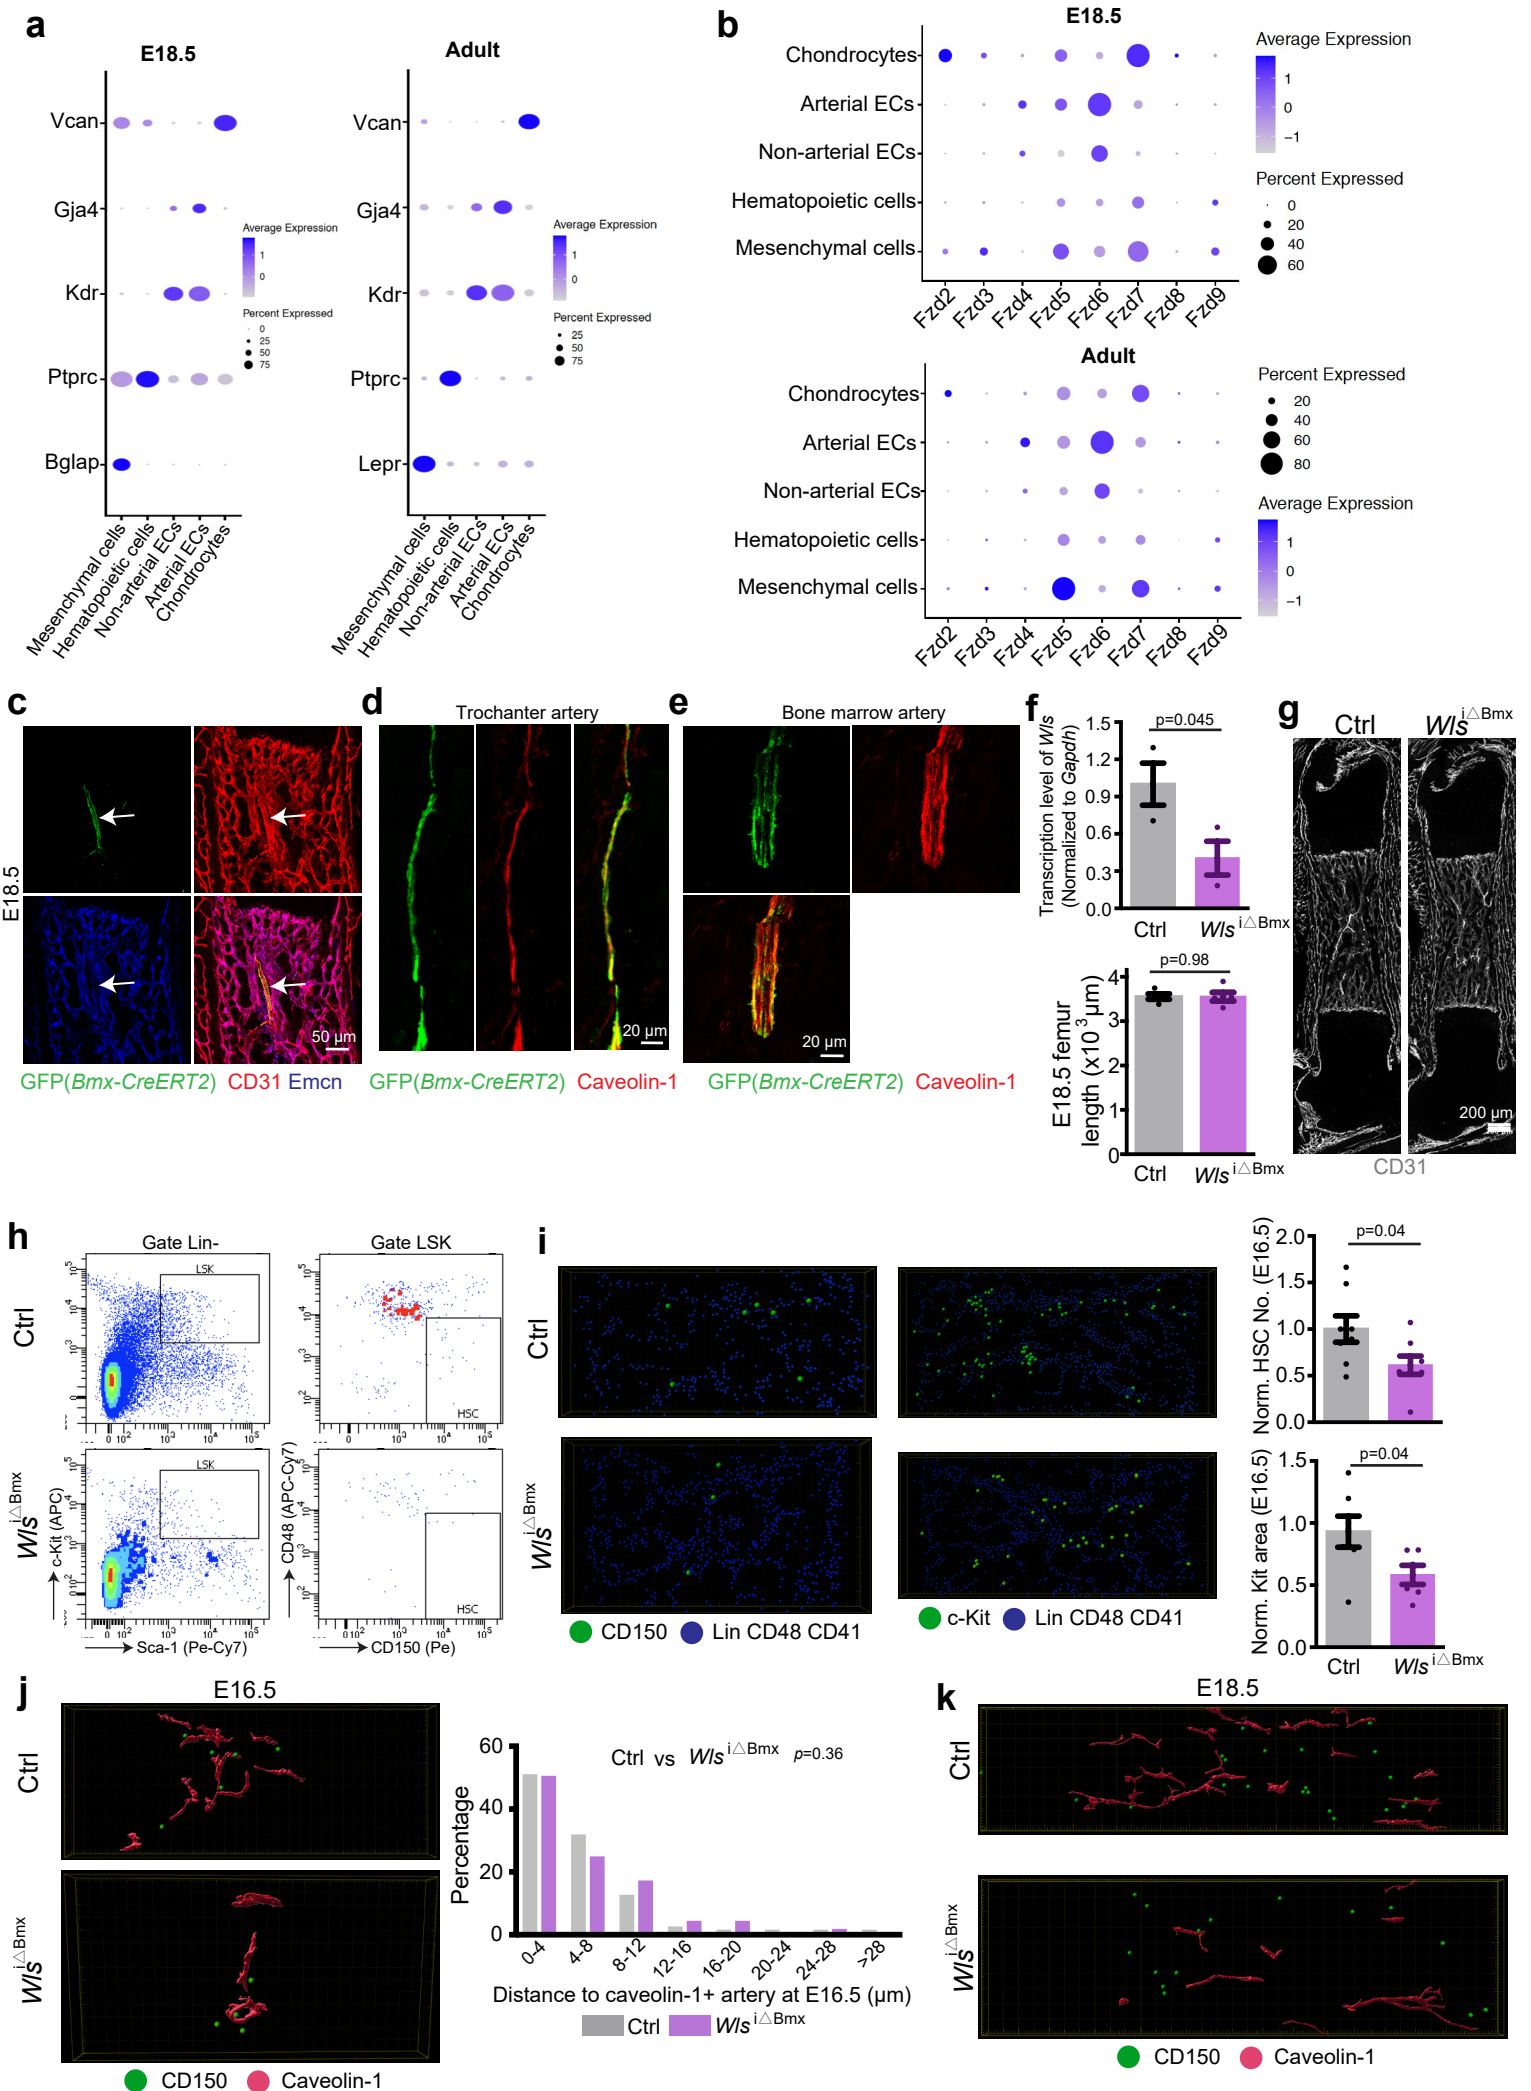

## Supplementary Fig. 7 | Additional analysis of $Wls^{i\Delta Bmx}$ mutants.

- (a)** Representative markers showing unsupervised clustering of cells in targeted scRNA-seq at E18.5 and in adult. Dot size indicates percentage of cells where the gene was detected, color reflects average gene expression level in each cluster.
- (b)** Dot plots showing Frizzled receptor transcripts in different BM cell populations in E18.5 and adult BM based on targeted scRNA-seq.
- (c-e)** Representative confocal images confirming that the tamoxifen-inducible  $Bmx$ -CreERT2 allele specifically triggers recombination (GFP expression in R26-mTmG Cre reporter background) in  $CD31^+ Emcn^-$  arteries (arrows) in BM (c), caveolin-1<sup>+</sup> trochanter artery (d) or caveolin-1<sup>+</sup> artery in BM (e).
- (f)** Quantification of knockout efficiency in  $Wls^{i\Delta Bmx}$  artery by qPCR analysis of FACS-sorted  $CD31^+ Emcn^-$  AECs from fetal mice (N=3). Error bars, mean $\pm$ s.e.m. Two-tailed Student's t test.
- (g)** Tile-scan overview images of  $CD31^+$  ECs (gray) in E18.5  $Wls^{i\Delta Bmx}$  and littermate control femur. Femur length is comparable in E18.5 in  $Wls^{i\Delta Bmx}$  (N=5) and littermate control embryos (N=5).
- (h)** Representative FACS plot for quantification of LSK cells and HSCs in E18.5  $Wls^{i\Delta Bmx}$  mutant and littermate control.
- (i)** Representative 3D-reconstruction of  $CD150^+$ ,  $c\text{-Kit}^+$  and mature  $Lin^+ CD48^+ CD41^+$  haematopoietic cells in E16.5  $Wls^{i\Delta Bmx}$  and littermate control femur. Quantification of normalized number of HSCs (Ctrl =8;  $Wls^{i\Delta Bmx}$ =8) and  $c\text{-Kit}^+$  cell area in E16.5  $Wls^{i\Delta Bmx}$  mutant and littermate control (Ctrl =7;  $Wls^{i\Delta Bmx}$ =6). Error bars, mean $\pm$ s.e.m. Two-tailed Student's t test.
- (j)** Representative 3D-reconstruction showing  $CD150^+$  cells and caveolin-1<sup>+</sup> arteries in E16.5  $Wls^{i\Delta Bmx}$  and control femur. Quantification of the distance between  $CD150^+$  cells and caveolin-1<sup>+</sup> arteries. Ctrl =99;  $Wls^{i\Delta Bmx}$  =78, P-value, Kolmogorov-Smirnov test.
- (k)** Representative 3D-reconstruction showing  $CD150^+$  cells and caveolin-1<sup>+</sup> arteries in E18.5  $Wls^{i\Delta Bmx}$  mutant and littermate control.

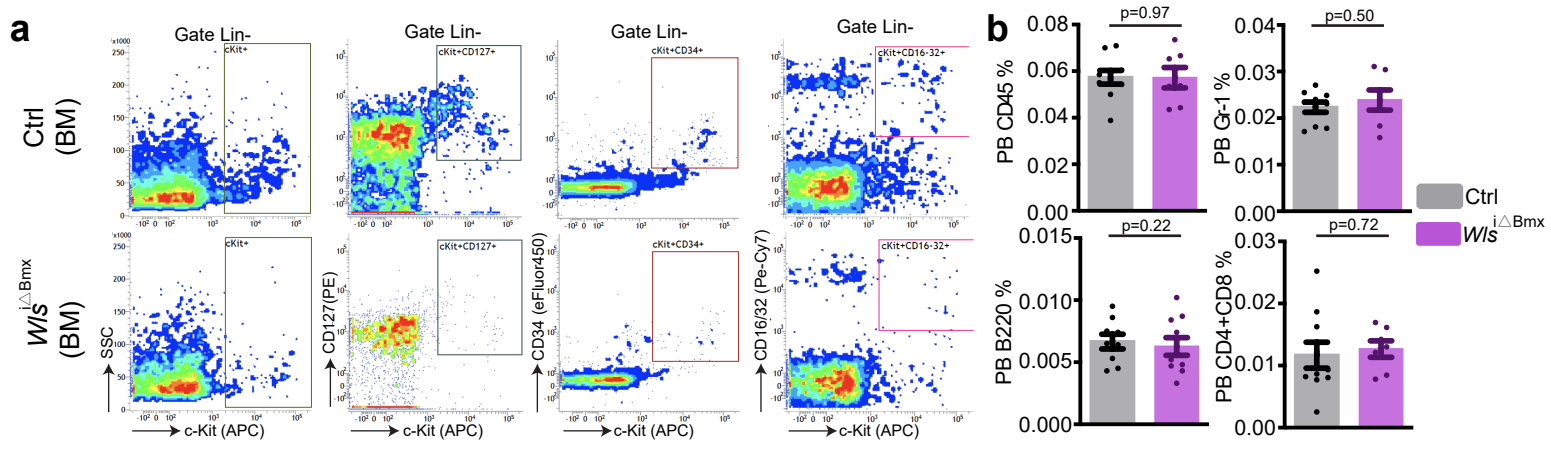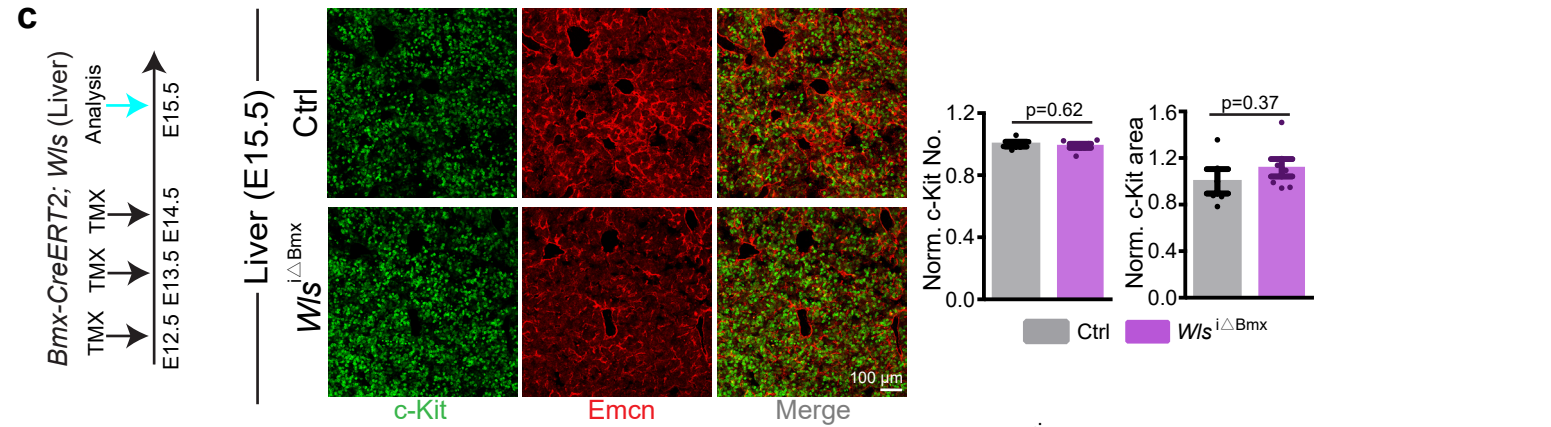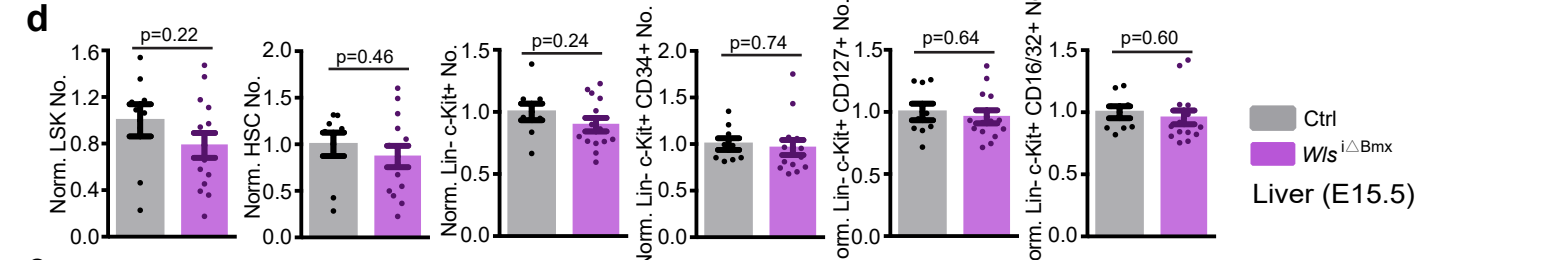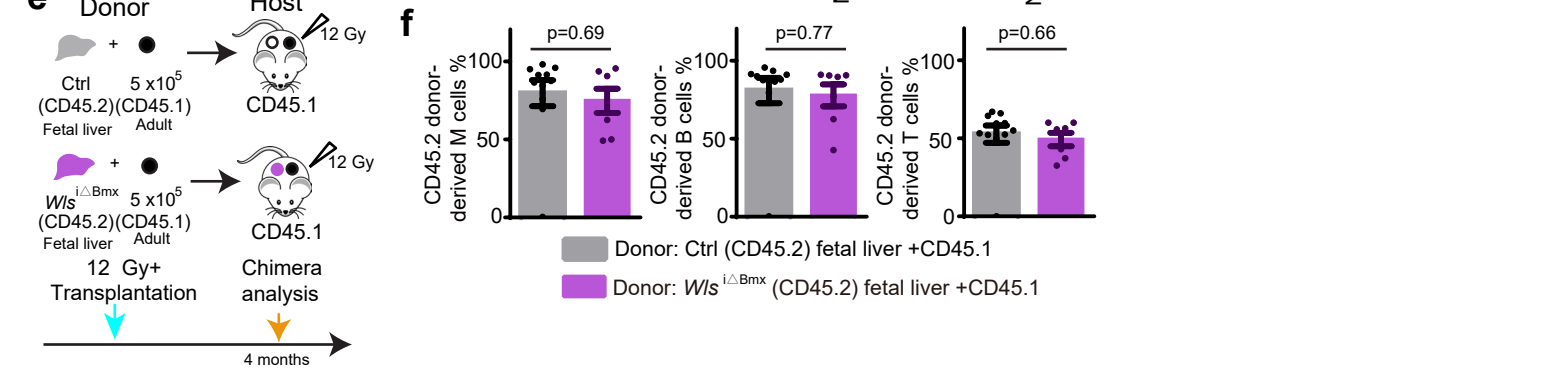

## Supplementary Fig. 8 | Analysis of $Wls^{i\Delta Bmx}$ mutant liver.

(a) Representative FACS plots for quantification of HSPC subsets in E18.5  $Wls^{i\Delta Bmx}$  and littermate control.

(b) Quantification of percentage of  $CD45^+$ ,  $Gr-1^+$ ,  $B220^+$  and  $CD4^+/8^+$  cells in E18.5  $Wls^{i\Delta Bmx}$  and littermate control peripheral blood. Ctrl =10;  $Wls^{i\Delta Bmx}$  =7. Error bars, mean $\pm$ s.e.m. Two-tailed Student's t test.

(c) Diagram showing tamoxifen administration and analysis of  $Wls^{i\Delta Bmx}$  livers. High magnification images showing c-Kit<sup>+</sup> hematopoietic cells in  $Wls^{i\Delta Bmx}$  and littermate control liver at E15.5. Quantification of c-Kit<sup>+</sup> cell number and c-Kit<sup>+</sup> covered area.  $Wls^{i\Delta Bmx}$  =7; control=5. Error bars, mean $\pm$ s.e.m. Two-tailed Student's t test.

(d) FACS based quantification of HSPC number in  $Wls^{i\Delta Bmx}$  (N=14) and littermate control liver (N=9). Error bars, mean $\pm$ s.e.m. Two-tailed Student's t test.

(e) Diagram depicting CD45.2/CD45.1 competitive repopulation assay using  $Wls^{i\Delta Bmx}$  and littermate control fetal liver.

(f) Quantification of competitive repopulation assay showing percentages of liver donor-derived (CD45.2, control=1 and  $Wls^{i\Delta Bmx}$  =7) myeloid cells ( $CD11b^+$ ), B cells ( $B220^+$ ), and T cells ( $CD4^+$  or  $CD8^+$ ). Error bars, mean $\pm$ s.e.m. Two-tailed Student's t test.

(g) Diagram depicting transplantation of  $Wls^{i\Delta Bmx}$  and littermate control fetal liver donor cells into lethally-irradiated mice and analysis at 2 weeks after transplantation.

(h) FACS based quantification of LSK%, SLAM-LSK% as well as the number of BMNCs,  $Gr-1^+$  myeloid cells,  $B220^+$  B-lymphocytes and  $CD4^+/8^+$  T-lymphocytes at 2 weeks after transplantation of  $Wls^{i\Delta Bmx}$  and littermate control fetal liver cells into irradiated recipients.  $Wls^{i\Delta Bmx}$  =8; ctrl=10. Error bars, mean $\pm$ s.e.m. Two-tailed Student's t test.

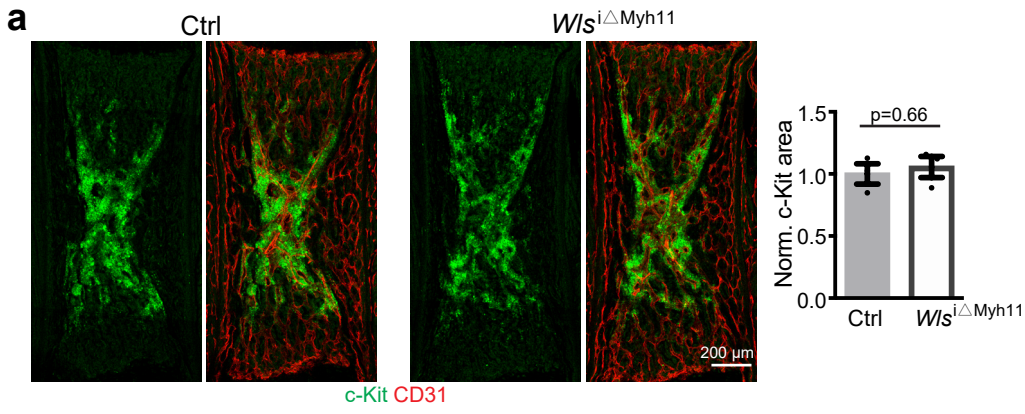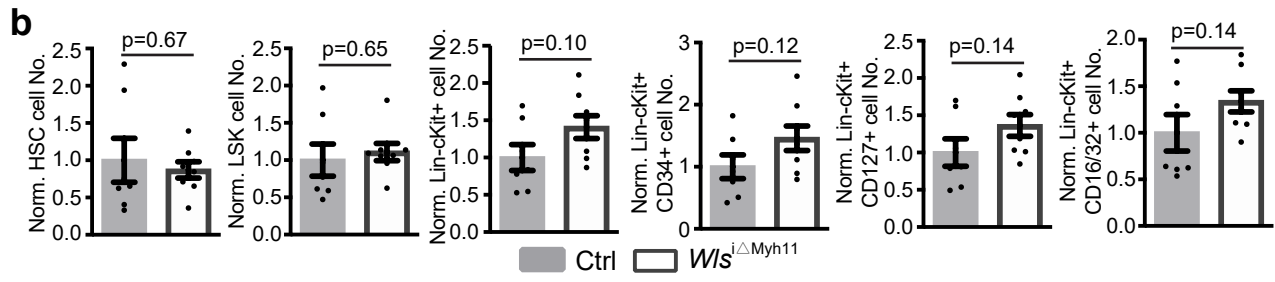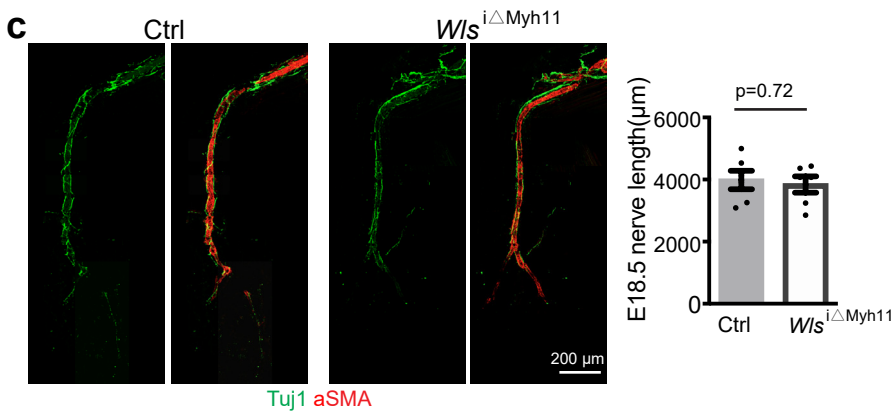

**Supplementary Fig. 9 | Normal hematopoietic cell expansion and nerve extension in  $Wls^{\Delta Myh11}$  mutants**

(a) Representative overview image of c-Kit<sup>+</sup> cells in E18.5  $Wls^{\Delta Myh11}$  mutant and littermate control. Quantification of c-Kit<sup>+</sup> cell covered area. Ctrl=3;  $Wls^{\Delta Myh11}$  =3. Tamoxifen was injected from E14.5 to E16.5. Error bars, mean±s.e.m. Two-tailed Student's t test.

(b) FACS-based quantification of normalised HSC, LSK, Lin<sup>-</sup> c-Kit<sup>+</sup>, Lin<sup>-</sup> c-Kit<sup>+</sup> CD127<sup>+</sup>, Lin<sup>-</sup> c-Kit<sup>+</sup> CD34<sup>+</sup>, Lin<sup>-</sup> c-Kit<sup>+</sup> CD16/32<sup>+</sup> cell number in E18.5  $Wls^{\Delta Myh11}$  knockout (N=8) and littermate control (N=7). Error bars, mean±s.e.m. Two-tailed Student's t test.

(c) Stitched images from serial sections of Tuj1<sup>+</sup> nerve fibres and  $\alpha$ SMA<sup>+</sup> vSMCs in E18.5  $Wls^{\Delta Myh11}$  mutant and littermate control. Quantification of nerve length.  $Wls^{\Delta Myh11}$  (N=4) and control (N=4). Error bars, mean±s.e.m. Two-tailed Student's t test.



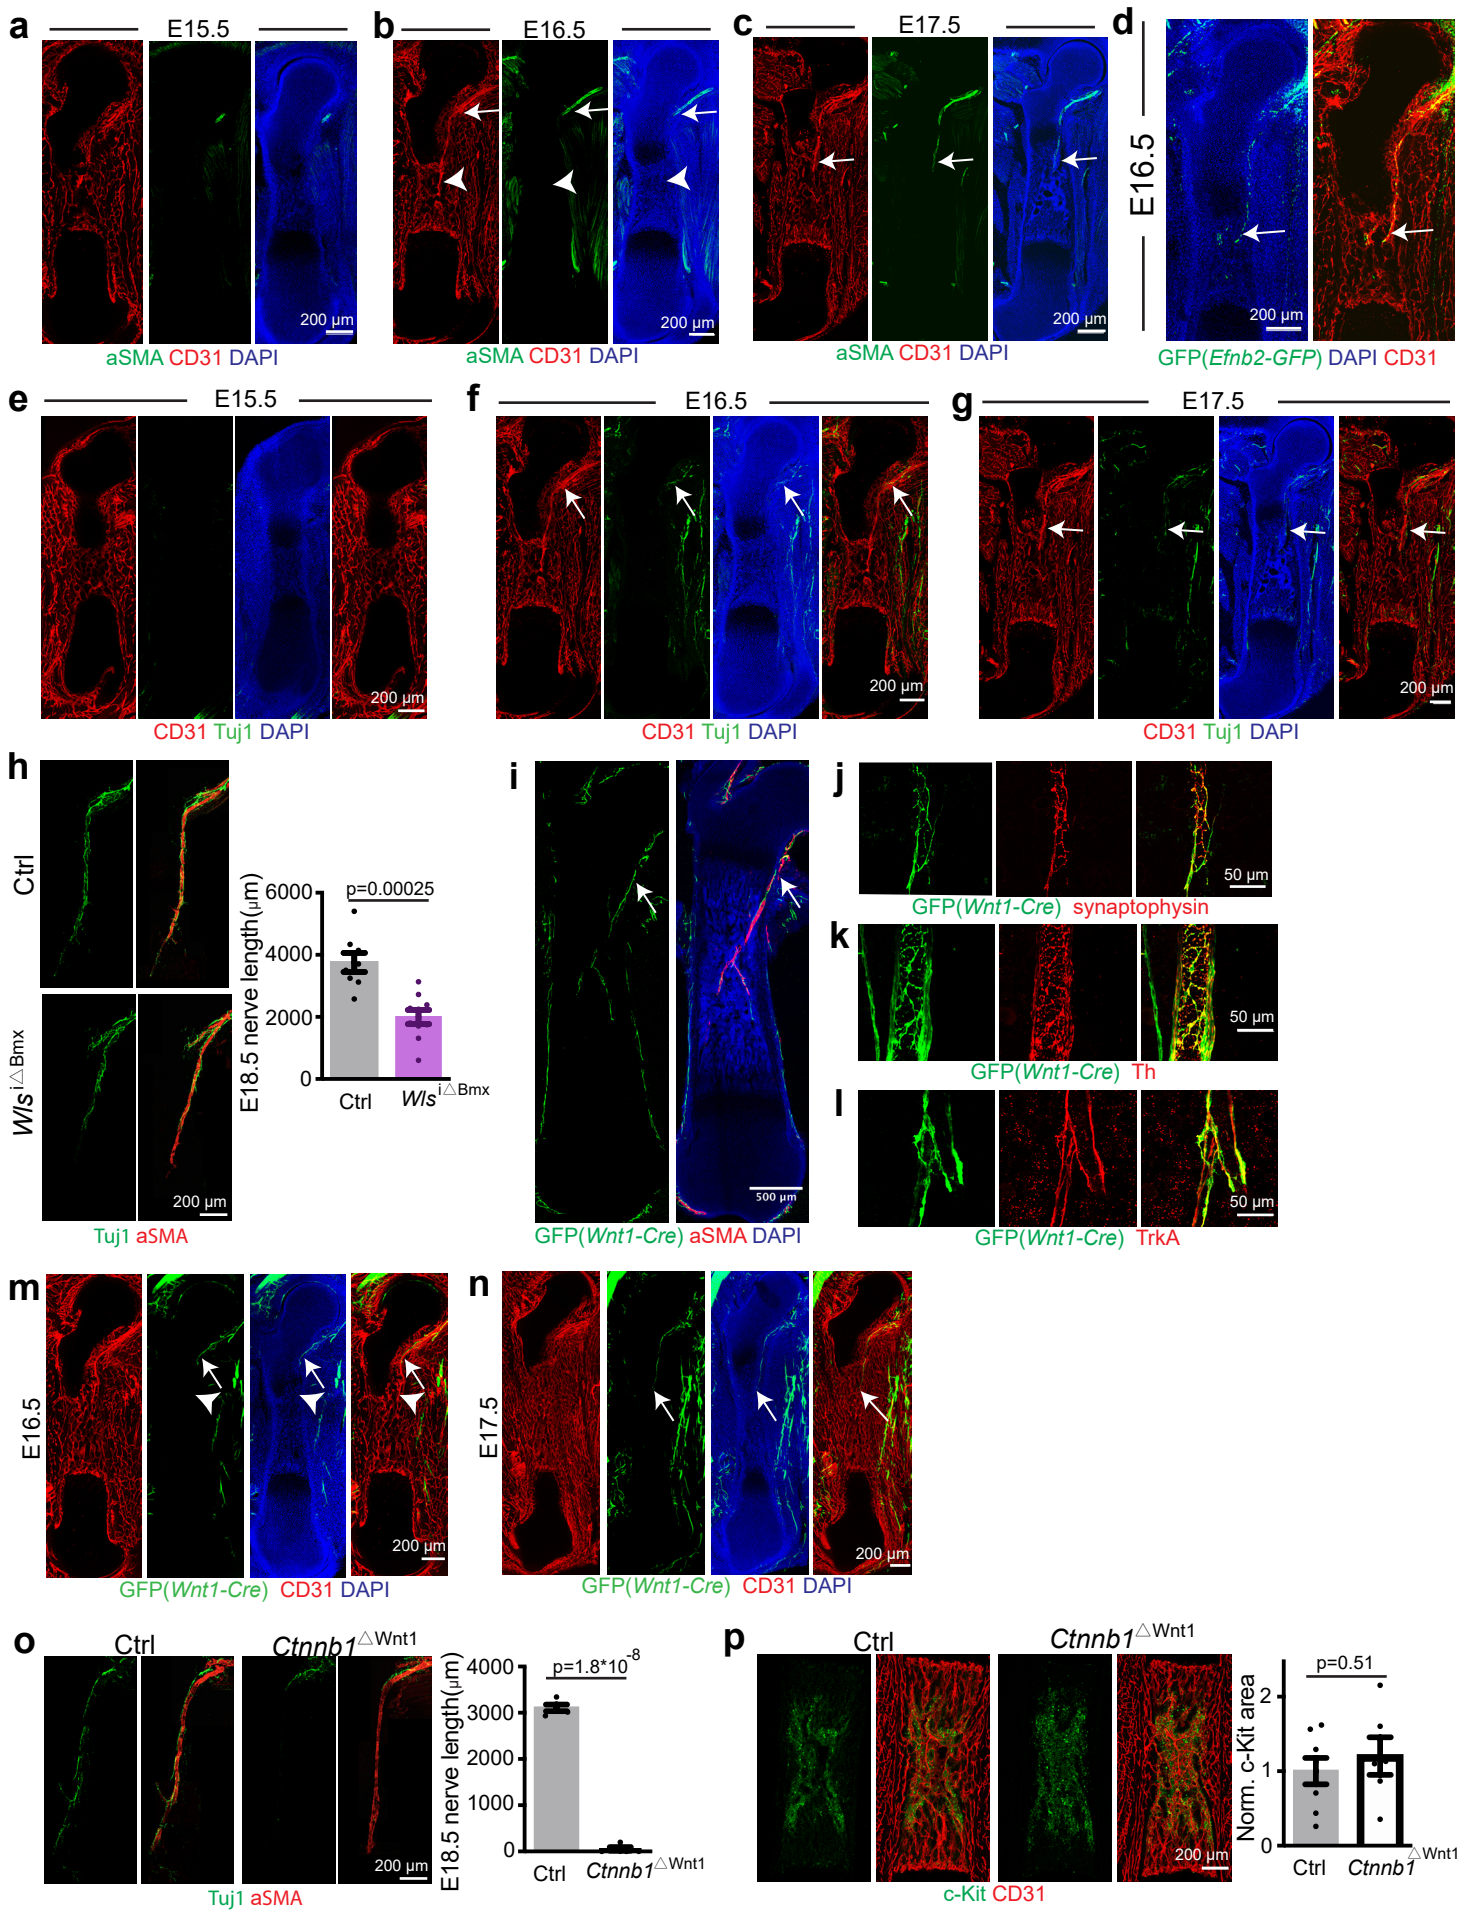

## Supplementary Fig. 10 | Femoral nerves are not required for fetal HSPC development.

- (a-c) Representative overview images showing ingrowth of the trochanter artery into BM. Arrows mark expansion of vSMC-covered rear part of trochanter artery, arrowhead indicates arteriolar front part.
- (d) Overview image of trochanter artery in *Efnb2*-H2B-GFP (*Efnb2*<sup>GFP</sup>) knock-in reporter. Green, H2B-GFP; Red, CD31; Blue, DAPI. Arrow indicates trochanter artery in E16.5 femur.
- (e-g) Representative overview images showing development of Tuj1<sup>+</sup> nerves in femur at E15.5 (e), E16.5 (f) and E17.5 (g). Arrows indicate extension of nerves.
- (h) Stitched images from serial sections of Tuj1<sup>+</sup> nerve fibres and  $\alpha$ SMA<sup>+</sup> vSMCs in *Wls* <sup>$\Delta$ Bmx</sup> mutants and littermate controls at E18.5. Quantification of nerve length. Ctrl=8; *Wls* <sup>$\Delta$ Bmx</sup> =10. Error bars, mean $\pm$ s.e.m. Two-tailed Student's t test.
- (i) Tile-scan image showing ingrowth of Wnt1-mTmG-labelled nerve at lesser trochanter and extension into BM along artery (arrow) at P0.
- (j-l) Validation of Wnt1-mTmG GFP signal in postnatal nerves. GFP signal overlaps with synaptophysin (j), tyrosine hydroxylase (Th) (k) and Tropomyosin receptor kinase A (TrkA) (l) immunostaining.
- (m-n) Overview images showing developmental change of Wnt1-Cre-driven GFP expression in femoral BM and around trochanter artery at E16.5 (m) and E17.5 (n). Arrowheads point to the trochanter artery, arrows mark the adjacent nerve.
- (o) Stitched serial sections of Tuj1<sup>+</sup> nerve fibres in E18.5 *Ctnnb1* <sup>$\Delta$ Wnt1</sup> mutant and littermate control. Quantification of nerve length. Ctrl=5; *Ctnnb1* <sup>$\Delta$ Wnt1</sup> =5. Error bars, mean $\pm$ s.e.m. Two-tailed Student's t test.
- (p) Representative overview image of c-Kit<sup>+</sup> cells in E18.5 *Ctnnb1* <sup>$\Delta$ Wnt1</sup> and littermate control BM. Quantification of c-Kit<sup>+</sup> cell covered area. Ctrl=8; *Ctnnb1* <sup>$\Delta$ Wnt1</sup> =6. Error bars, mean $\pm$ s.e.m. Two-tailed Student's t test.

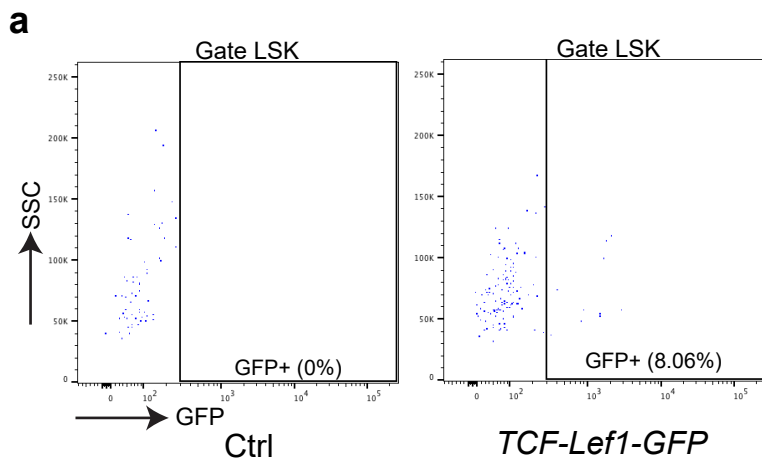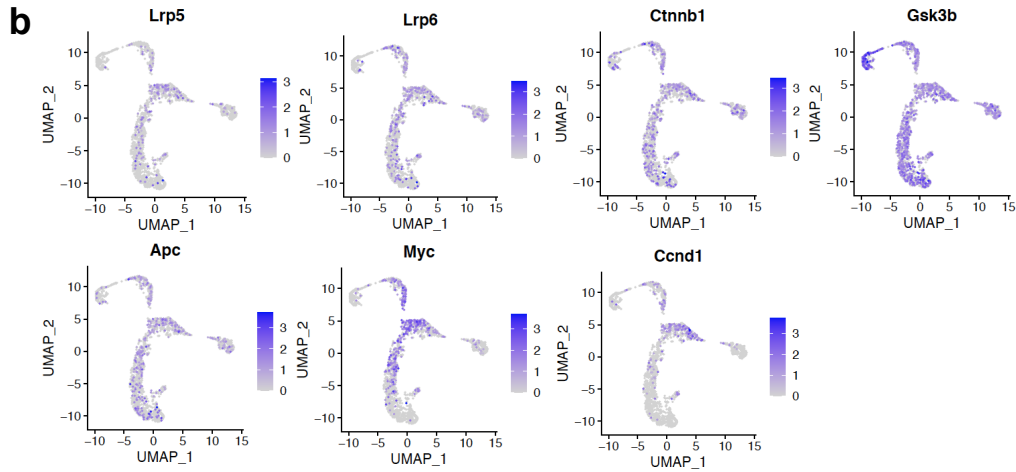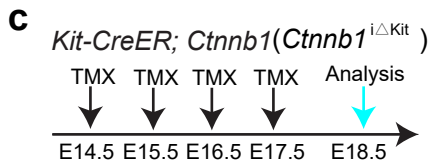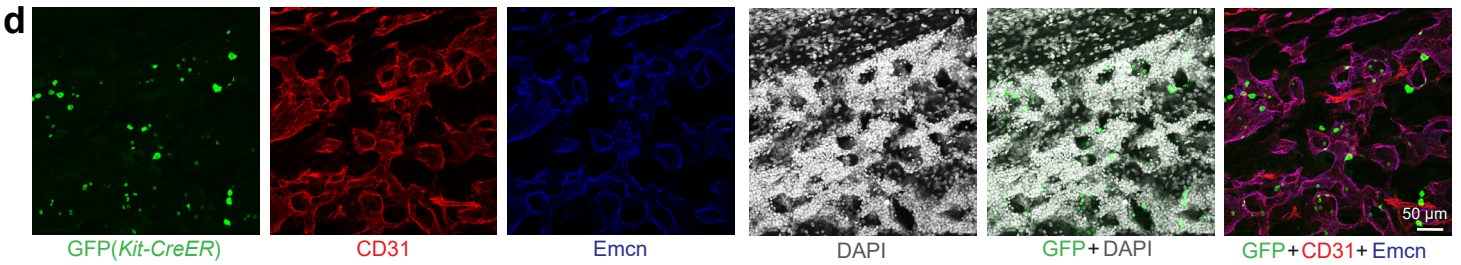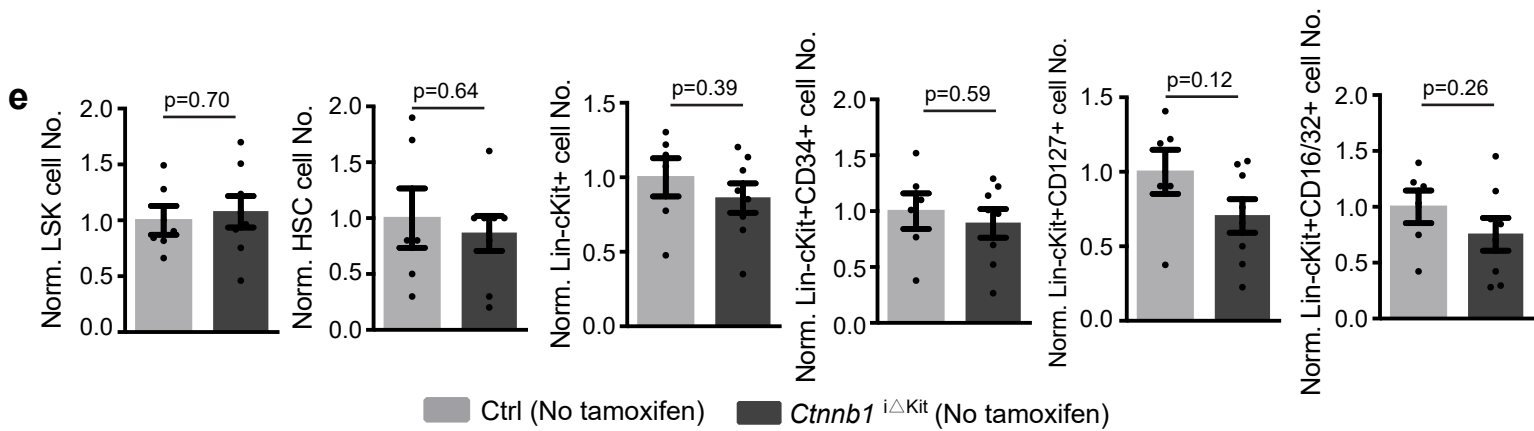

**Supplementary Fig. 11 | Additional analysis of Ctnnb1 inactivation in hematopoietic cells.**

**(a)** Representative FACS plots of LSK cells from TCF-Lef1-H2B-GFP reporter mice and littermate controls at E18.5.

**(b)** UMAP feature plots showing expression of canonical Wnt signalling components in multipotent HSPCs. Color represents relative gene expression level.

**(c)** Schematic diagram showing tamoxifen injection and analysis of Ctnnb1<sup>iΔKit</sup> mutants.

**(d)** High magnification images showing very limited Kit-CreER-controlled recombination in ECs of fetal Kit-CreER R26-mTmG femur. Green, GFP; Red, CD31; Blue, Emcn.

**(e)** FACS-based quantification of normalized HSC, LSK, Lin<sup>-</sup> c-Kit<sup>+</sup>, Lin<sup>-</sup> c-Kit<sup>+</sup> CD127<sup>+</sup>, Lin<sup>-</sup> c-Kit<sup>+</sup> CD34<sup>+</sup>, Lin<sup>-</sup> c-Kit<sup>+</sup> CD16/32<sup>+</sup> cell number in E18.5 Ctnnb1<sup>iΔKit</sup> mutants and littermate controls in absence of tamoxifen injection. Ctrl=6; Ctnnb1<sup>iΔKit</sup> =8. Error bars, mean±s.e.m. Two-tailed Student's t test.

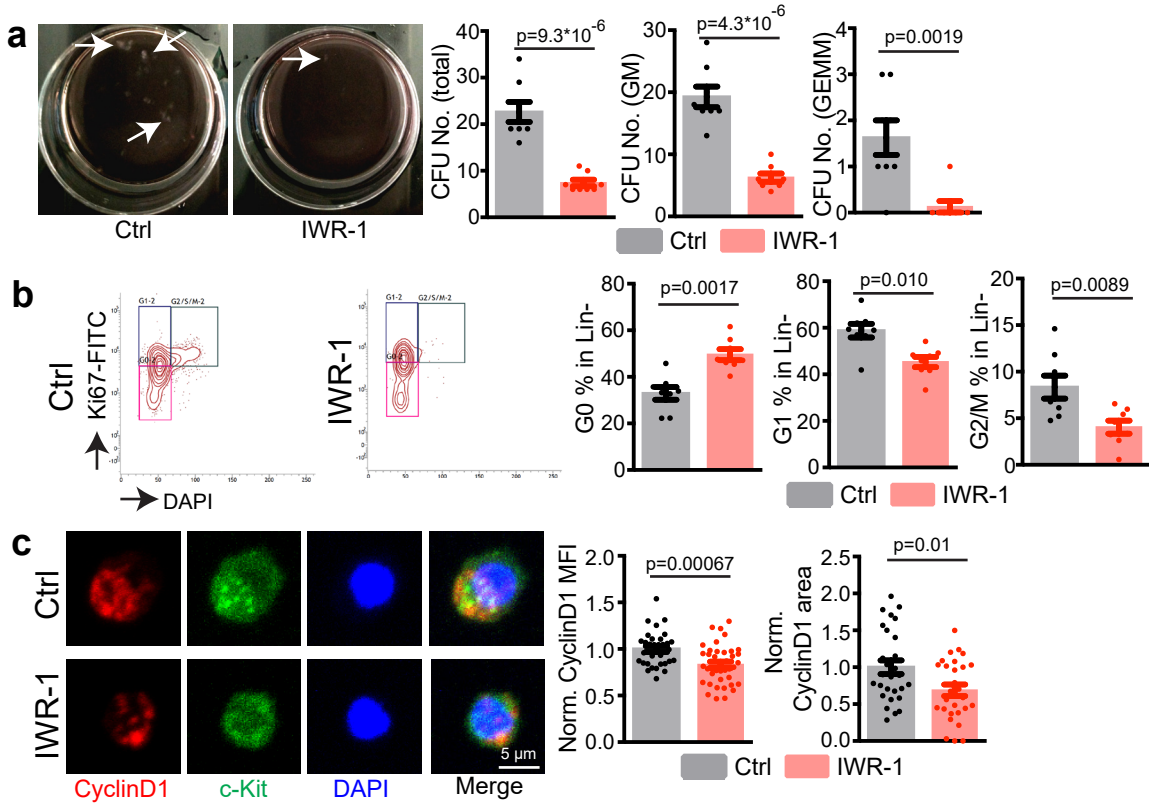

## Supplementary Fig. 12 | Effect of IWR-1 on HSPCs

**(a)** Representative images (dish at day 8 after seeding) and quantification of colony forming units from 1000 Lin<sup>-</sup> c-Kit<sup>+</sup> cells isolated from neonatal wild-typed mice. IWR-1 or vehicle was added to MethoCult medium (vehicle=8; IWR-1=8). Error bars, mean±s.e.m. Two-tailed Student's t test.

**(b)** Representative FACS plot showing Lin<sup>-</sup> cells in the G0, G1, G2/M/S phase of cell cycle (left) and quantification of Lin<sup>-</sup> cell percentage in each stage of cell cycle (right) after IWR-1 treatment. Ctrl=8; IWR-1=8. Error bars, mean±s.e.m. Two-tailed Student's t test.

**(c)** Representative image of CyclinD1 expression in FACS-sorted Lin<sup>-</sup> c-Kit<sup>+</sup> cells after IWR-1 treatment. Red, CyclinD1; Green, c-Kit; Blue, DAPI. Immunostaining based quantification of mean fluorescent intensity (MFI) (Ctrl=32 cells; IWR-1=40 cells) and area of Cyclin D1+ signal (Ctrl=28 cells; IWR-1=28 cells). Error bars, mean±s.e.m. Two-tailed Student's t test.

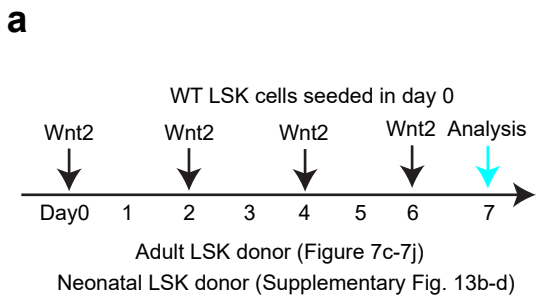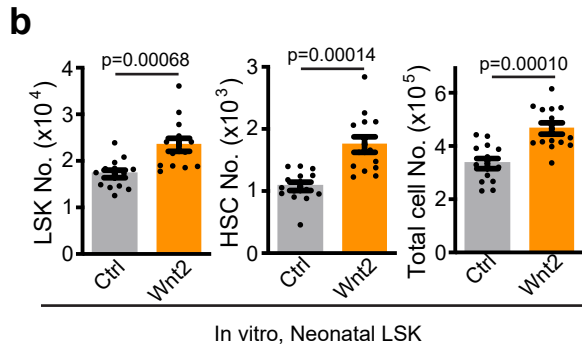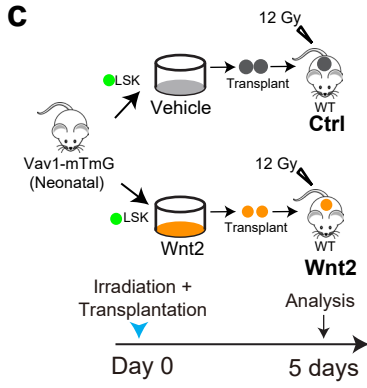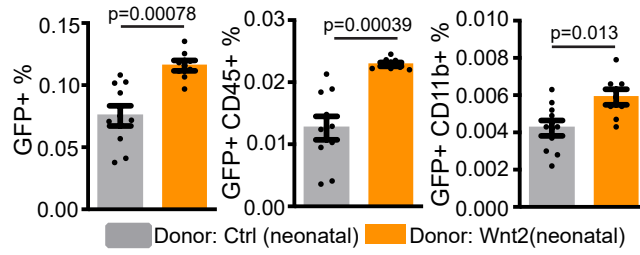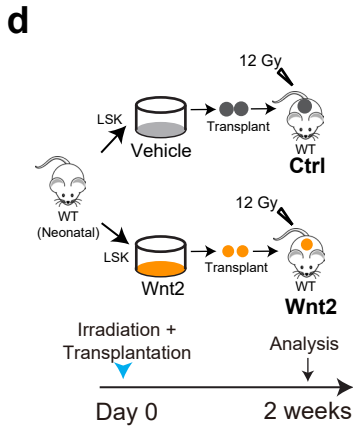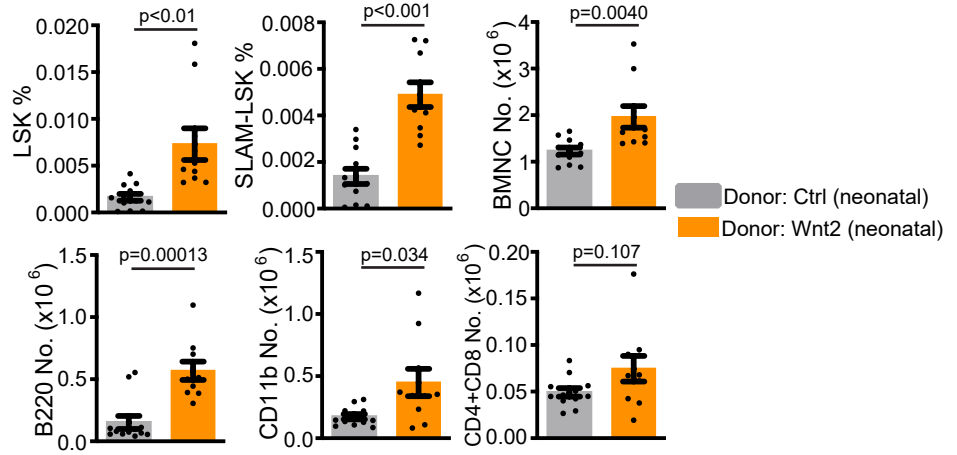

### Supplementary Fig. 13 | Additional data about the effect of Wnt on HSPCs.

**(a)** Diagram showing protocol for Wnt2 treatment in vitro.

**(b)** Quantification of HSC number, LSK number and total cell number after Wnt2 treatment. The same number of neonatal LSK cells was seeded. Vehicle=10; Wnt2=9. Error bars, mean $\pm$ s.e.m. Two-tailed Student's t test.

**(c)** Diagram showing Wnt2-treatment of sorted Vav1-mTmG neonatal LSK cells in vitro followed by analysis at 5 days after transplantation into lethally-irradiated WT mice. FACS based quantification of GFP<sup>+</sup>, GFP<sup>+</sup> CD45<sup>+</sup> and GFP<sup>+</sup> CD11b<sup>+</sup> cell percentage in BM at 5 days after transplantation. The same number of neonatal LSK cells was seeded before Wnt2-treatment. ctrl=10; Wnt2=8. Error bars, mean $\pm$ s.e.m. Two-tailed Student's t test.

**(d)** Diagram showing Wnt2-treatment of sorted WT neonatal LSK cells in vitro followed by analysis at 2 weeks after transplantation into lethally-irradiated WT mice. FACS based quantification of LSK%, SLAM-LSK% as well as the number of BMNC, Gr-1<sup>+</sup> myeloid cell, B220<sup>+</sup> B-lymphocyte and CD4/8<sup>+</sup> T-lymphocyte. The same number of neonatal LSK was seeded before Wnt2-treatment. ctrl=12; Wnt2=10. Error bars, mean $\pm$ s.e.m. Two-tailed Student's t test.
