# Supplementary material for: A specialized bone marrow microenvironment for fetal haematopoiesis
Source: PubMed Central journal article supplement (PMC8921288; doi:10.1038/s41467-022-28775-x), 2022-03-14
Supplement: 41467_2022_28775_MOESM3_ESM.pdf [file 41467_2022_28775_MOESM3_ESM.pdf]

### **Description of Additional Supplementary Files**

File Name: Supplementary Data 1

Description: Metadata tables of cell-to-cluster assignment

File Name: Supplementary Data 2

Description: Tables of cluster-specific markers

File Name: Supplementary Data 3

Description: Metrics summary of single cell RNA-seq experiments

File Name: Supplementary Data 4

Description: Amplicons for targeted scRNA-seq in FASTA format
