# Supplementary material for: A specialized bone marrow microenvironment for fetal haematopoiesis
Source: PubMed Central journal article supplement (PMC8921288; doi:10.1038/s41467-022-28775-x), 2022-03-14
Supplement: 41467_2022_28775_MOESM7_ESM.pdf [file 41467_2022_28775_MOESM7_ESM.pdf]

>Acan|ENSMUST00000032835.6|PolyA\_1 location: chr7(+): 79114408 site\_id: 441410, AMPLICON  
ATGCTAGAACCCTCGGGCAGAAGAAAGATCGCTACGAGATCAGCTCCCTGGTGCAGTACC  
AGTGCACCTGAGGGCTTTGTCCAGCGCCACGTGCCACCATCCGGTGCCAGCCAGCGGGC  
ACTGGGAAGAGCCTCGAATCACCTGCACAGACCCCAACACCTACAAGCACAGGCTACAGA  
AGCGGAGCATGAGACCCACACGGAGGAGCCGCCCCAGCATGGCCCACTGAGAGGAGCTTC  
CATAATGTGCCCAGGATGCTGAGCCAGCGGCCAGCCAGGCTGACCGTGCATCCCACCA  
CATGGTGTCTTCTTGTGCTGCTTTTTGTTCATATAAGGAATCCATTAAGAAGGAAAAAAC  
CC

>Acp5|ENSMUST00000069330.13|Reference\_end location: chr9(-): 22126732  
site\_id: 1310963, AMPLICON  
AATCACTCTTTAAGACCAGCCTCCCAAGGAGACCCAGACCCTGAACACCACGAGAGTCCT  
GCTTGTCCGCTAACGGGTGTGAGGGAGGAGCGTCTGCAGGCGTGGTGGGTGGGCCCTGT  
GAGGACCTCACTCACGGCAGCTTCTCTGCCCTGGTACTCTGGCAGAGAGGGAAGGGGAAC  
CAAGGGGCTTACTTACAGGAAAGAAGTATGCCACACCAACTGATCCCACAGCCAGGCTC  
ACCCCTTTTAGGGTAGAGCTTCTTGGGAACGGGCTTTCCTTTCAGTCAAGTCTTACTGT  
CACTGCTATTCAATAAAACAATGCTTTGTCTCC

>Acta2|ENSMUST00000039631.9|PolyA\_1 location: chr19(-): 34241525 site\_id: 1448698, AMPLICON  
ACCGCAAATGCTTCTAAGTCCCCCTGCTCTGCCTCTAGCACACAACCTGTGAACGTTTTG  
TGGATCAGCGCTCCAGTTCCCTTCCAAATCATTCCCTGCCCAAAGCTTTGATTTGTTACT  
CGTGGTTTTTTTTAAAAATAAATCAGACATGTGCTACCCT

>Adipoq|ENSMUST00000023593.5|PolyA\_2 location: chr16(+): 23157739 site\_id: 478107, AMPLICON  
ACCAACTGACTGCAACTACCCATAGCCCATACACCAGGAGAATCATGGAACAGTCGACAC  
ACTTTCAGCTTAGTTTTGAGAGATTGATTTTATTGCTTAGTTTGAGAGTCCTGAGTATTAT  
CCACACGTGTACTCACTTGTTCATTAACGACTT

>Alp1|ENSMUST00000030551.10|Reference\_end location: chr4(-): 137741748  
site\_id: 1284765, AMPLICON  
AGTCACGGCCAGTCCTCAAGCCCAACCCTCCCTGGGGGAAGACCAGGTCTGCTCAGGAT  
GAGACTCCCAGGAAGCCACCTCCGGGGTTGGCTGTCTACCCAGGGTTGCCAAGCTGGGAA  
GAACACTCCAGCCGGACAGGACACACACACACTCCCCACCAATTGCAGAGACTCGCC  
AACCCCTTCACTGAAGTGGCTCTCCTGTTTTGGAATAGCGGGGTGGGGTGGGGGAgaagaa  
gaaagaaagaaaaaaaATTTTAAATTTCTTTTTTGGTGTGGTTAAAAGGGAAACAAG  
ACATTTAAATAAAACATCCCAA

>Amer1|ENSMUST00000084535.5|Reference\_end location: chrX(-): 95420335  
site\_id: 489634, AMPLICON  
GTGAGGGTTGGGTCTATTAAGAGGGGGCTTTAATTATTCCTGTTACTATTGGTGCTTATT  
TTCCCGCTGTATATGGGGGTGGGGAAGGGCTGGGGTAAACCAGAAATGTATATTTAGGT  
CACGTTAAATAAAATGGCTGGGGGAAGAAGAAAGATATGAGTCTAGGTGTAAGAGTTCTC  
TCTTCCAGGACAGAAAGGGGATTGTAGCTTGTGCTGCACCTGAGCTTCCCTTCCGCATT  
CCTGAGACATCATGGAATCATCTGCATTTGTTACCTCTCCATCCCTAGCACTCACTGGCA  
TCTGGATATCCTGATACACTGCCTGTATGTTACAACATATATTTTCATTTGCTGAATGCTA  
ATAAACTTCTGTGCTCAT

>Amfr|ENSMUST00000053766.13|PolyA\_1 location: chr8(-): 93971927 site\_id: 449037, AMPLICON  
GATCGGCTCAAATCTCCACGTATTTAAGGATTTGAAACATGCAATCATAGGATACATAG  
TTTTATGTCCCATTGGATTAAGGTTTTTTTTTTTTTAAATGTTTCAAACATAGTTTATGG  
TAGTCCTTTTGGGAAAAATCCAGTATTATCTAAAATTATTGGCAAAGTTAAATGTATTTT  
ACATACCTGGAAGTTTTTAGACTGTTGATAAGTAACTGAGAAAGGATAACAGGCGCCTAG  
GTGAAGATAATTTATTTCAATAAATCTTTCAAAGC

>Apc|ENSMUST00000079362.12|PolyA\_1 location: chr18(+): 34319538 site\_id: 1467677, AMPLICON  
ATGGTGTGCAGAGAGATAGCTACAGTGTAAACGATTACACTATTTTTGTGCTCAAATCTGT  
GTAAGTGTAAAGCATTGAATGAAACTATTTTAACTGAACTAGATTTTATCAAAGTAGGT  
AGAATTTTTGCTATGCTGTAAGTGTGTATATTCTGGTATTTGAGGTGAGTTGGCTGCTC  
TTTTATTAATGAGACACGAATTGTGTCTCAAACATAAATGAACATTTTCAGAATAAATTATT  
GCTGTATGTAAACTATTACTGAAATTTGGTATTTGTTTGGGGTCTTATTTACATTTGTA

TTAATAACTGTCAAAGGGCCTCTTTTAAAAGCTAAATGTAATTTTTTTTTCTTCAGATTC  
TATGCATTAAGAGTAAAATTTCTCTTGCTG  
>Apc|ENSMUST00000079362.12|PolyA\_2 location: chr18(+): 34319395 site\_id:  
1467678, AMPLICON  
CATGGTGTGCAGAGAGATAGCTACAGTGTAAACGATTCACACTATTTTGTGCTCAAATCTG  
TGTAAGTGTAAAGCATTGAATGAAACTATTTTAACTGAACTAGATTTTATCAAAAGTAGG  
TAGAATTTTTGCTATGCTGTAAGTGTGTATATTCTGGTATTTGAGGTGAGTTGGCTGCT  
CTTTTATTAATGAGACACGAATTGTGTCTCAAACCTAAATGAACATTTTTCAGAATAAATTAT  
TGCTGTATG  
>Apc|ENSMUST00000079362.12|PolyA\_3 location: chr18(+): 34322188 site\_id:  
1467679, AMPLICON  
ACCCAGGTCATTTTCTCCTGTTCTAACTCTGCTTTTTGTTAGGCCATTGATGCATCTTT  
CCGACTGTATGTTCTGTGTATAATGCTGTTCTTGGTGCTAAATAGACTTTCTTTCTCCTG  
ATATTCAGGATAATTTTTCTCTATACTTCTGTTCACTTGTCTTTCTTGAAGTTATCTGATT  
GTTATTTTTAATTAATAAATACTTAAATG  
>Apln|ENSMUST00000039026.7|Reference\_end location: chrX(-): 48025149  
site\_id: 488396, AMPLICON  
GCTCACAAAAGACTCGCTATGCTTAAAGGGCCAGTTTACATAAATTTGAGCCCTTTTAA  
GTCTTTGGCATCTGTTTCGAATGTCTCATTTTTCTGGCAGTGTCACTTAAAGGATTTTT  
TTTCCAGAAGCAATTCATTTAAGGACACGCTGATCAAAGGTGGGATTTGTAATAACGCT  
GTTTTGTAGCCCTGGTGGGTGCCTTCTGTTTTATCTGCTTTTGAATACTTTCCGGACTTT  
TTAGCCAGTTTGCCTTTCTTGACAAATGTTGTCTCAGCCATAAATACATTTGGTAATGA  
CTTTGTATGTATCGTTTTATTGTTTCACAAAGTGGAGTTGCTTGATGAATGAGATAACCT  
GGAAAATAAAGTTCCGAGGAGTTCGATAG  
>Aqp1|ENSMUST00000004774.3|Reference\_end location: chr6(+): 55348523  
site\_id: 432542, AMPLICON  
CTTAGCAGTCAAGGCCATGTTTGGCCACCCCATGGTCAATGACGTGGACTCCTCTCACCT  
CCAGCTTCTCAGTTTCTGCCTGGGCAATGGCTAAGGGCCAGGGGTGAGGGTGGGGGTGGA  
GGTGGTGAGAGCTTTGCTGGAGAGGGGCAGGGCAGGCCATCCCACCTGGTTCTGGCCAT  
TGTGAACCAGGACCTTGTATCTGTCTGCTCTGTGTATGTTTCTTTGCAATTGAATTCAT  
CTTATG  
>Aspn|ENSMUST00000021820.13|Reference\_end location: chr13(+): 49567559  
site\_id: 1113965, AMPLICON  
GGAAACAGTATGGACGCCAATCAATTTTATATCAACTTATCTCTTCAAATATGCACATTGG  
GTAAATGCCTGGAAACATAGCTAAGGTGACAAAAGTGAAGTGAACAAAAGTAAATAGT  
ACTTTCATGTGTTTTTTTTTAACTGATATTCATTATGAATTAAGTAAAAGTGAACAATA  
GGAAAACATTAATAACTGGTTTTCA  
>Atp6v0d2|ENSMUST00000029900.5|Reference\_end location: chr4(-): 19876839  
site\_id: 418024, AMPLICON  
tcaaccaccttagactgtcctctcaaacctgacccaaaagaaacccttcccttttctaa  
ctggtgtttcaggtatgttggtgagcaacacaacaaagtaactaatacagaaaactgat  
actgccattgctacaataaacttgattttgggatt  
>Atp6v0d2|ENSMUST00000029900.5|PolyA\_1 location: chr4(-): 19878071  
site\_id: 418025, AMPLICON  
GCTGGCATTCAACAGGCAATTCATTATGGTGTGTTTTATGCGTATGTAAAGTTGAAGGA  
GCAAGAGATGAGAAATATCGTGTGGATAGCAGAATGCATCTCACAGAGGCATCGAACTAA  
AATCAACAGCTACATTCCAATTTTATAAGCCAGTGTACAGAAGATCATAACATGTTGCCAT  
GAAGTTATTGAGGAAAGGAAGGGGGATTGTGTACATTATCTAGATTATATAAAAGTAAG  
TCATACCACCTTTCCATAAACTACATGTCCACTGGAAGCCCAGTAAACAGAACTTG  
>Axin1|ENSMUST00000074370.9|Reference\_end location: chr17(+): 26195809  
site\_id: 480766, AMPLICON  
CATGTCACTGAGTGCCTTCAACATAGCTGTCTCTTGCCTGCCACTGTGTGAATCTGGCAG  
CTGAGTATCTCAGGCCCTTTGCCTGTCTCTAGCCACCAGCTTGGTTTTCAGCAGGAGGGGG  
GGCGGTGTGTCTGGTCCCTTCCAAGTGTCCGTGTAATATGTACATTTCTCAGGCCAGGG  
CCAGCAGGGGGATAACCCTGAGCCCATTTTTTCATGCAATGACTTGTACAATTATCTTTTCA  
AAGTACTTGGATAAATAATGAAATAAAAACGTTTTTGAACCT  
>Axin2|ENSMUST00000052915.13|Reference\_end location: chr11(+): 108950778  
site\_id: 464753, AMPLICON

TGGCTAGTGCTTACTTGGGAATCAGGACAGTACCTGTACAGGCACGGGGACCCGCTCCG  
TCCGTGCGCCGCCCTATATTGAGGGCTCCAGCTCTCCCTTGGTTTTTGAAGGGGTTTAT  
GTATAAATATATTTTATGCCTTTTTATTACAAGTCTTGTACTCAATGACTTTTGTCTATG  
GCAGTTTGTCTACTTTAGACTGTAAATTATGCATTATAAAGAGTTCATTTAAAGAAAAC  
TACTTGGTACAATAATTATTGTAATTAAGAGATGTAGCCTTTATTTAAATTTTATATTTT  
>Bglap|ENSMUST00000076048.4|Reference\_end location: chr3(-): 88383501  
site\_id: 414166, AMPLICON  
TGAAGACCGCCTACAAACGCATCTATGGTATCACTATTTAGGACCTGTGCTGCCCTAAAG  
CCAAACTCTGGCAGCTCGGCTTTGGCTGCTCTCCGGGACTTGATCCTCCCTGTCCTCTCT  
CTCTGCCCTGCAAGTATGGATGTCACAGCAGCTCCAAAATAAAGTTCAGATGAGG  
>Bglap2|ENSMUST00000098956.2|Reference\_end location: chr3(-): 88377736  
site\_id: 414164, AMPLICON  
TGAAGACCGCCTACAAACGCATCTACGGTATCACTATTTAGGACCTGTGCTGCCCTAAAG  
CCAAACTCTGGCAGCTCGGCTTTGGCTGCTCTCCGGGACTTGATCCTCCCTGTCCTCTCT  
CTCTGCCCTGCAAGTATGGATGTCACAGCAGCTCCAAAATAAAGTTCAGATGAGG  
>Bglap3|ENSMUST00000075523.10|Reference\_end location: chr3(-): 88368622  
site\_id: 414160, AMPLICON  
CCCTGCTTGTGACGAGCTATCAAACCAGTATGGCTTAAAGACCGCCTACAGACGCATCTA  
CGGTATCACTATTTAGGACCTGTGCTGCCCTAAAGCCAAACTCTGGCAGCTCGGCTTTGG  
CTGCTCTCCAGAACTTGATCCTCCCTGTCCTCTCTCTGCTGCTGCAAGTATGGATGTCA  
CAGCAGCTCCAAAATAAAGTTCAGATGAGG  
>Bmx|ENSMUST00000112265.8|Reference\_end location: chrX(-): 164192841  
site\_id: 491476, AMPLICON  
ggcttcaccctactatctctgcttcttgccttacaattcaagatgtgagctctcagaagct  
gaaaagggtggcttgggtgcttaagaacaccgggctgttcttctagaggaccagactcaatt  
cctagcaccacacagtggtttacaacttgtctatgaatccagttctaaggatctgatg  
acgtcttttggccttcatggacacatggacacgtgtggtacactgacatgtatacaggc  
aaaGAAGAAAAATAAaggatgagagctctcagcatcctgctctatctgcctgtttgcaag  
ttgcctttgcctgccatthtgaactctaactttctggaactataagccaaataaagcct  
ttcttctat  
>Car2|ENSMUST00000029078.8|Reference\_end location: chr3(+): 14900768  
site\_id: 1275635, AMPLICON  
AGTCCACATCATGAGACAAACTGAAGTAACTTAGGCAAAACAGGTAAAACAGTCATAGTT  
TTGTGATTATAAATGAGATGAATGTTACCCTTCCAAGATCTTATATTTAAAGAAAAAATT  
TTAAAAAGCTTATATATTTGTAGCAAAGTTATTCTTAAAATATGAATTATGTTATAACTTA  
GTGACTTTTGTATTTCTAGAGGTGTAAATGAGGATGTAAAAATTGATATAGTTGTGATACA  
GAGTATATTTCCCTTCAGATAACATAACCACAACACAATGGATAATGTATTTTAGATATAT  
TCTCTAATAAAAATTGAGAACT  
>Car3|ENSMUST00000029076.5|Reference\_end location: chr3(+): 14872509  
site\_id: 1275633, AMPLICON  
CCAGCGATAATCCATCACTCGTTAAAATTTGCCTACTACCAAGTTTGCCTGGTTTTAGT  
CACCTATAAAACACACCCATGAAGCCAGGTGTTTTAAAATGTTTGATCCAGCATTTAAAT  
TTCTTCTTCATAAAGATGGTTTTCTTTGCCCAAAGTAGAGCCATTTATTTTTTATTTTAC  
TACTTTAATCTTTGCATGCCTATTaaaaacaaaaacaaaaacaaaaacaaaaacaaaaa  
cagcaacaacaaaaaaacTGTGTCAGGTGTCTTTTGGAGTTGGAGGCTGGGATGTCTGGT  
TCCTGGAACAGGAAGGAGGGAATGTCAACACTGAAGCCAAGAGCTTGCATTGATCACAGA  
A  
>Cav1|ENSMUST00000007799.12|Reference\_end location: chr6(+): 17341297  
site\_id: 430968, AMPLICON  
GAACCCTGCTTACTTGTCTTCTCCTTCAGTCTTGCCGACACTTTACCAACCTGCTACCT  
ACTTTGATTGTTTGCATTTAAAACAGACACTGGCATGGCCACAGTTTGAATTTTAAACTG  
TGCACATAACTGAAAGTGTACTAGACTGTATACTTTTACATGTAGAGATATTTCTTTAT  
CTTTATATAAGGAGAATCACTTGGGAAATGATTCTACAATTCAGTCTGTAAACTGTGTGT  
TCCAAGACATGTCTGTTCTCCCTAGATACTCAGTTTTATACAAGTCAATTGCTGATCCAA  
AAGTTACTGAAATTTTATATGCTTACTGATATATTTTACACTTTTTTATGCTGCATGTC  
CTATAAAGATTTCAAA  
>Ccar2|ENSMUST000000035612.6|Reference\_end location: chr14(-): 70138177  
site\_id: 1331295, AMPLICON

TTAGGTGATGGAGCCCATTCAAGGAGCATTGTTGGTGGTGGTTCAGGGTTGCCAATAGAACA  
CTGTGTCAGCTGCCCCAACTTGCCAGAAGAACCAGCACTTACTTCTTTCTCTAGTTC  
TTATGTTTCCAGAAATGTGGTATTGGCCCTGGCCTAGCCCCTTCCACTTCCATAATTCTTGC  
CTCTTCCATAAATTCATGGTTTCAGTTCGACTTTGTATATAAAGttgtttggtggtttt  
tttttttttttggctttttggttttttAAATAAACCAAAGTGA  
>Ccar2|ENSMUST00000035612.6|PolyA\_1 location: chr14(-): 70138684 site\_id:  
1331296, AMPLICON  
CACCTTGAGATGCAGCGGATTGTTGAGAAGGCTGCACAGCTGGGTAGAGAAAGAAGAGCCA  
ACGCCTAGCAACTGAGTGGCTGCCTAGTGAGGTCTGCGATGGAGCCTGATGACATTAGAG  
CCCTTTTGGTACCAGAAGGCAGCTGGAGCAGGGCCTGGGAGCCACAGCAGGGGTAGCTTG  
AGTTCGTGTCTCAGCCTCTGCAGGGATGTCAAACCTCAGTATGGGGTTTGTGCTATGTGG  
ATGGATATGTAAGGAACCTCCAGTTCAGCTACAACCTAAATACAACGTCCTTTGC  
>Ccn3|ENSMUST00000050027.8|PolyA\_1 location: chr15(+): 54753533 site\_id:  
475120, AMPLICON  
ATAGACAAACCGACTCCTTTCCAATAGAAAGAAGCTGAACCAAAAACCTCCAATGCAGAG  
ATGACGGGGCCTCTCAGCTCATGTTTTGTACCCCGGAGGCTGCTGAGGCCCACTTCTTCA  
AAATTAACAGGGACTCTTTCATAGTTAAAGTACACTGAAGACCAAGCCACCTAATTTAC  
AATCTCTGATGATTTTTCAAATGTGCTTTTTAGTGCAATTTTGAAAAGGAAGAGCAGAATCT  
ACAAAATTTTATGAAAGTTTTAAAGTAGCTGAAGACCTGCTCAAATACATCTTTTGGTCA  
TAGTTATGAAAACACAAGTTATACATGTGTACCTATGTATGCTTAATAAACAAAGTTCA  
>Ccna2|ENSMUST00000029270.9|Reference\_end location: chr3(-): 36564873  
site\_id: 412698, AMPLICON  
CTCTTCCGAATCTTACCCTGTTCTAAGTAAGTAGCTCCTTGCAGCTCTGAAAATTTGTA  
AAAATTGATGTTTTCTATAAACTCTTCTTTCTTTTCCCCAGAGGACATGTAGGCCAG  
AATGCTCTAATTTCTTGCTACCAGGACTGCCCATGAAAAATGTAGAAAACCTGCTTTGTTG  
CCCATTTTTCTCTTGAACAGTAATTATATATGTGTGTAATAAAGCATGCAAATTA  
>Ccmd1|ENSMUST00000093962.4|Reference\_end location: chr7(-): 144929979  
site\_id: 1305822, AMPLICON  
TCTGTAGGTTCTAGTGTCCGCTTGTGTTTTGTGTTAATTACAGCATTGTGCTAATGTAA  
AGACTCTGCCTTTGCGAAGCCAGCTGCAGTGTGTAGGCCCCCAAGTTCCTAGCAAGCT  
GCCAAACCAAAACGGGCACCACCAGCTCAGCTGAGGCATCCCAGCCAGGCAGGACCCTTG  
AGGGCCGCTGTATCCATGGTGTATGGGGTGGGTTTTGGCCAAAAGGCCAAAGACTGGTGG  
TGGGTCCACGGAATCTGCCCTGTGACATGAAAGGCTTTGAGGGGCTCTGGCTGGTGGCCA  
GGTTGGCTTTTTGTATTTCTGGTTGACACACCATGGCGCTTCCCAGCACAGACATGTGAC  
CAGCATGGTCCAGGA  
>Ccn1|ENSMUST00000108023.9|Reference\_end location: chr7(-): 38097987  
site\_id: 439475, AMPLICON  
TACTTGACCCACTGGACTCTTACACAGATGACACAAGCTTGAAGTTAAGGAGGCCACGC  
CATGGCGGTTGCTGGCCTCTGCTCGGGTGTGTTAGGTTGCTGTTGATAGGCTGTGACCAG  
TGGTGTGAGCAAGTGTGGGATGCAGAGCCCACAGCCTGGCCTAGGCTGCCCTTCTCCAC  
TGTCAGCCAACAGCATGTCTGCCTTCATGAACTCTTATTTGTAAGTGTCTGCTATGTCT  
ATCAATTTTTAATAAAGATAATACTATCTTTG  
>Ccny|ENSMUST00000053917.5|PolyA\_1 location: chr18(-): 9315947 site\_id:  
1327257, AMPLICON  
CAAATCGGGAATGCCATGCTATGCCCTTGAATCTGTGTGCTCTGTAAGAAAGACTTCCT  
GCATTCCTTCATGCTGCTCTCGGGATTGGGGATGGGGATGTTTGTTCATTTTTATTCTGG  
TTGGGTTTTGATTCCCTCAGAGCAGAGATAGTTTGTAAACCACCATGGCACAGACATCC  
AAATAAATAGTACTGATTGTT  
>Cdc73|ENSMUST00000018337.8|PolyA\_1 location: chr1(-): 143604102 site\_id:  
1265982, AMPLICON  
GGGATTGTGTGTTAGGAACTGTTTATAAGAGTATCTTGAAGTTACAAATTGCCATATAC  
TGAAATACAGTAAGCATTCTATATGAATAAAGTTTTGTGGACTACAACCTAGTTTTGTGCCA  
AAATTAATAAAGATGGGATTATATGTCAAATTAAGGAAACTTTCCAAGTATTTTGTATTC  
TGTTAAATTTTGTCTATTTTAAATGTAAGTAAAGCTACTTAGCCTC  
>Cdc73|ENSMUST00000018337.8|PolyA\_4 location: chr1(-): 143607377 site\_id:  
1265985, AMPLICON  
TGGGAAGCTACAGTATGATTTGGGGGATGAGTGTGTGTCACATAGTTACAGTGTAAC  
TGAACCTCCTCTAAGTCTGACTATGATTCTTATTTTATATGCGATAAGATTTTGGTCTT

CTATTTGTACACATGTCAACTTGGGACTTCTTATCTTCCATTATCCCTAAATAATGATAA  
ATTCCCAGGCACCAAAGAACACATTTGCTTACGTGTCTGAAAATGAAACAAGATAAAAAC  
ACTGGTATTTTTATGTGTGTGTGTTCAATGTGGTATAAAAATATAAACCTATATTTTAAAC  
GTAGTAAGATATTTTACTATTCCTCTACTTTACAGAGTGTTCATCCACGCTACAATTA  
TGACCATATTCCTTG  
>Cdh13|ENSMUST00000117160.1|PolyA\_1 location: chr8(+): 119324449 site\_id:  
450047, AMPLICON  
AGGCTAAGGGCTGAACTATTCTCCCATGGGCAAGTCTGCCACTGTACCACCCAGACCCA  
CAGTCCTATGGTCCCTTGTGGTGACACAGATCATGGTGGTGGCCCTCTCCCTCCTCGGTGT  
ATGTACAAGTACAAATGTCATCATGGTGTACCTATGAGGAGACCAACAGCACCATCTTGT  
ATGCACATCTATTACCCACACATGTACACACGCATTACGCATATCCGCACCGTTTGTTC  
CTATATACAGGCATAAAATAGAGTAAGCCAGGTAGTTTTTCAAGTACCCTTCCGTGTGA  
CTACCGTTGTTTCGCAAAGCTGA  
>Cdk1|ENSMUST0000020099.12|PolyA\_1 location: chr10(-): 69338306 site\_id:  
1318079, AMPLICON  
TCGTGTTGTTTACCCTGGCTCTCTCCTGTCTTGTATAGTTTTCTTTGTTTGTAACTG  
TCATCTGGACTTTTTCTTAATTCCTACGTATAACTTAATTAACATGTAAATATTATCCA  
TATGAATTTAAATATAATTCTGTATATGTG  
>Cdk14|ENSMUST0000030763.12|Reference\_end location: chr5(-): 4803393  
site\_id: 423789, AMPLICON  
CCCCACTGGTTTATATAACGCACTGAGATGTGTACTTTTTATTGGGGTTAGTACCTCAGA  
GACTCATTATGCTTCAACATGACACATAGCAAGGAGAATGGAATACTACATGTTGCATAT  
GTGTTGCCAATTGTAATTCGTCTGTATTATGAAGGATGTAATGGTTTGTGAGCTGTCATT  
GTTTTCTGTAACATGATATGGAATAAAATATAGCCAAATCTGC  
>Cfh|ENSMUST00000111976.8|Reference\_end location: chr1(-): 140085878  
site\_id: 1265961, AMPLICON  
GCATTGAAGTATTGTTTAACTCATGTCTTCTCATAAAATATAAACATTTTTGTTATATGGT  
GATTAATTTGTAACCTTTAAAACTATTGCCAAAATGCAAAAGCAGTAATTCAAAACCTCCT  
AATCTAAAATATGATATGTCCAAGGACAACTATTTCAATCAAGAAAGTAGATGTAAGTT  
CTTCAACATCTGTTTCTATTTCAGAACTTTCTCAGATTTTCTGGATACCTTTTGATGTAA  
GGTCTGATTTACAGTGGATAAAGGATATATTGACTGATTCTTCAAATTAATATGATTTCC  
CAAAGCATGTAACAACCAAACTATCATATATTATATGACTAATGCATACAATTAATTAC  
TATATAACTTTCAA  
>Cilp|ENSMUST00000048762.7|PolyA\_1 location: chr9(+): 65280536 site\_id:  
452653, AMPLICON  
GCCCCACGATGACAAAACAAAGATTCTCCTCTTAAAAAGAAACAAAAGGAATTGGTAAA  
CGTCTGCAGCTTTGGCTGAAAACACACATCTTATTGTATGGTTTTGCCAGCCTTTACACT  
AATGATAATCTAATACTGAGGCTCAAGTGAACAACAATAAAACATTTTTCTTGGCCATGT  
TCCACAAGATGTAAG  
>Cnmd|ENSMUST00000022603.7|Reference\_end location: chr14(-): 79637726  
site\_id: 474151, AMPLICON  
GGGCATGGTGTAAATCCAGTTCATCTATCAGGACTGCCAAGCAAGAATCGATATGAGAGT  
TGAGAACCAAAGAAGCATAGAGCATGTCCATGCCAAGAGACCACAAAGTATTTTATATTC  
AACCTGAATAATGTTATCCTAAACGCTGTTGTGCACCACTGTGTGCAAATGTGCTGAAAG  
GGTAGTTTAACTCTACAATTATTATCATTTTACGACTTGCTTTACCAATAAAGCCTACTG  
CAAGTCTTTA  
>Col10a1|ENSMUST00000105511.1|Reference\_end location: chr10(+): 34397085  
site\_id: 456076, AMPLICON  
GCAGAAAGTCCACATACCTGGTGTAACTTGAAACAAGTGTCTGACTTATGTCAGTAACA  
CAGTGCACAGTGTGATTACTCTGATTTAATTCCTTGCACTTTTGTAATGATTTTATGG  
GCTTATACAATATTAGAATAGACACTTTGTGTGCCTTTCAATCGAGTGAAGAATAAACA  
TTAAGGGTTTGAACATCAGACTAGAAACGAAAAGACATTATTTATTTATGCTCTGTACTG  
TATTTTACATTATTGTTTAAACTGGTAGGCTGTACCTCACTTATTAAGCCCCGAGTA  
TTAATCTACTTGGTATTACGAAGCAATAAAATGACATGAATAGACCTTTA  
>Col12a1|ENSMUST00000071750.12|Reference\_end location: chr9(-): 79598992  
site\_id: 453294, AMPLICON  
GCCTCGTAGCCGAAGTTATTGTATCAACTGGATACTGTTCCATATCGCTTTTACAGCTCT  
TTGTTTTGACACACTAACATTTATGCCAAATTGCAGATTATTCTGCAGAAATGGAATTGC

ATGTTTGTGTTGTATATTTAGAATGAACTttttttttttttttttttttGCAAAACATGTTTCT  
TAGTTATCAAAGCAGTTGGAAATGTTTGCAAGACTATGAACATAGAATTGCTGCTTTTAT  
ATTTAACTGCAGATTGTGAATTTACTGCCTTATATTTATTTCTGAAACAAAAGAG  
GCATTTTCAATAAAACTACTGAAAATTTGA  
>Col22a1|ENSMUST00000159993.7|PolyA\_1 location: chr15(-): 71798477  
site\_id: 475009, AMPLICON  
GTTATCCTTGGTGCTTCAGGCTACCAGAACTCCAAAAGAAGTCACATAGTATTGGCAGTA  
GCTTGTGTCAGGGCCCTCTATGAACAAGCTGGTGCTGAAGAAGAGTTCCCAGGTGTGACT  
TCACTTCTAACTGTGGCCTGAACCCCTTCAAGTTCCCTCATGCTGGTTTTCAATTGTGTGAG  
TTGCAAAATAAAAGTTTTCAATGGTC  
>Col2a1|ENSMUST00000023123.14|Reference\_end location: chr15(-): 97975602  
site\_id: 476624, AMPLICON  
GAATGGCTGACCTGACCTGATGATACCCAACCGTCCCTCCCCTCACAGCCCGGACTGTGCT  
CCCCTTTCTAAGAGACCTGAACTGGGCAGACTGCAAAATAAAATCTCGGTGTTCTATTTA  
TTTATTGTCTTCTGTAAGACCTCTGGGTCCAGGCGGAGACAGGAAGACTATCTGGTGTGAG  
TCAGACGCCCCCGAGTGACTGTTCCCAGCCAGCCAGAAGACCCCTACAGATGCTGGGC  
GCAGGACTGCGTGTCTACACAATGGTGCTATTCTGTGTCAAACACCTCTGTATTTTTT  
AAAACATCAATTGATATTA AAAAACCAAAAAAAAAAAAAAAAAATCATTGGAAAGGA  
>Cp|ENSMUST00000091309.11|PolyA\_1 location: chr3(+): 19992898 site\_id:  
412179, AMPLICON  
CAGAATCACTTGACACAGCCCACTTATCTGCACTGAAAGGActctggctctttaagctct  
cacctttcttattctcatctctagccctctttctcctccccacccaacatggctatggc  
cagtctctcttctctttctcctgccttctacaataaagctctaaaaccataaaaaaaaa  
tattaaaaaaaaaaaaaagaaaaGG  
>Ctnnb1|ENSMUST00000007130.14|Reference\_end location: chr9(+): 120960484  
site\_id: 1315788, AMPLICON  
CAGATAGAAATGGTCCGATTAGTTTCCTTTTTTAATATGCTTAAAATAAGCAGGTGGATCT  
ATTTTCATGTTTTTGAACAAAAACTTTATCGGGGATACGTGCGGTAGGGTAAATCAGTAAG  
AGGTGTTATTTGAGCCTTGTTTTGGACAGTATACCAGTTGCCTTTTATCCCAAAGTTGTT  
GTAACCTGCTGTGATACAATGCTTCAACAGATGCGGTTATAGAAATGGTTC  
>Ctsk|ENSMUST00000015664.4|Reference\_end location: chr3(+): 95509336  
site\_id: 414963, AMPLICON  
CGCAGCGATGCTAACTAAGATTGTTTCATTTCTCTCTCGTTGGTGCTTCCAGTGACAAC  
TCTACTTCCCTTCTCTCTGCCCAGGGCCCTTTTCTTTGTGGACACAACAGGGCATTTTTTC  
TGAGAGTTGTGGACTCTGTGCTGGTAGACATTGGAGTCTCCAGCAGGCTGGAGGACTAA  
GGTGACCTTCCCAGCCCTGTCTTCTGTATACACCAGTGAACATTTCACTTCCACTG  
AGATGCACAAATCTATTTCGTGATTCTTTGACAAATTTACATGATATTA AAAAAGTGT  
TTCTTCTTTGTATT  
>Cxc112|ENSMUST00000112871.7|Reference\_end location: chr6(+): 117181364  
site\_id: 1295749, AMPLICON  
CAAATTTCCCCCAGCAGACTTCTACCCTCGCCAAGTTCCCAAACCCACTCAGCAAAGTTG  
CCAACCTCGACGGGCTAGCAGTGTCTAAGCAGCGATGGGTTTCAGTGTGTGTGGTGAA  
TACTGTATTTTGTTCAGTTCTGTCTCCCAGATAATGTGAAAACGGTCCAGGAGAAGGCA  
GCTTCTATATGCAGCGTGTGCTTCTTATTCTTATTTTAAATATATGACAGTTATTTGA  
GAAGCCATTTCTACTTTGAAGTCATTATCGATGAAAGTGATGTATCTTCACCTACCATTT  
TCCTAATAAAGTTCTGTATTCAA  
>Cyt11|ENSMUST00000073554.3|Reference\_end location: chr5(+): 37739817  
site\_id: 425287, AMPLICON  
CAGCTCAGCTCCTAGGTGTCTCATTGGAATGTAAGAGGCACAAAGAGGAAAGTGCACACT  
GGCTTCGCTTTGGAGAGCAAGCACCTTAGGAACAGCAAAATCTCATGCCTTTGTGACTGT  
TTAATGAACTAATGGGACCACTCTTCTTTCTGGTCTCTGCTTACACCTACAGGGGCTTC  
AACTTTATGCTTCCCTTCTTCTGTGCAAGCTTTCTGCCTCTCTCTCATTTTAAAGTGT  
TTTACTGCTTTTGCATACATTTACAAGGCTTTTATGTAGTGTAAACGAGCCACCCCTTC  
GCTGAAGGGTGATGAAAACCAAATAAACCTCTGTCTGT  
>Dkk1|ENSMUST00000025803.8|Reference\_end location: chr19(-): 30545863  
site\_id: 486504, AMPLICON  
GGCAGAATTCAGAAGAGATTATGCAGAAGGAAGCCTGCCAAGCTTAAAGCCAAATAATTA  
TTCTGAATATTTTAGATCCTCTGACATGCTGAAGAATTGTTTCAATCACTTTGATTTAAA

AAATAATTACTAAACAATCATAAATTCTAGAATGTAACACTTCTCTTGCCAAGAAATTAT  
TTCATTTTTTGGCTTACCTGTACTCCATTGATTGGAATGAGAATGGCTTTATTA  
AAAAATCCCCGAATTGAA  
>Dkk2|ENSMUST00000029665.6|Reference\_end location: chr3(+): 132180301  
site\_id: 416708, AMPLICON  
GAGTTCAGCTTCGGACACACATTTGGTCAGGATGATGGTGGTTAGTGCTCTGCATGTGT  
CTGCTAGAACAAAACACTCATAAGCTAATTTACCCAAGAGCAAACCTTATGTGGTTAAGCT  
TTGTGATGTGAAAATGGAGTATTTTGGTCAGAATTTCTACATTTTCATACGACACCTACC  
ACCTAGTTTTTCGCATTATTCCCCTTATATTACCCCTCTCAAAAATTATTATTTGAAATAA  
TTTATTTACAGGAAATGTTAATGAGATGTATTTTCTTATAGAGATGTTTCTTACAGAAAG  
CTTTGTAGCAGAATATATTTGCAGCTGTCAACTTTGTAATTTAGGGGAAATGTATAATAA  
GATAAAATATATTAATTTTTCTTTTTCAAAAAGT  
>Dkk3|ENSMUST00000033036.6|Reference\_end location: chr7(-): 112116027  
site\_id: 443451, AMPLICON  
aattgttcaaatccattcTGTTC AAGACATGGGAGCGCTATGTGCTAAGTCTTCCACAT  
AAGAGCACCGAGTACCTCTTAAACGCCTGTAAATCGCATCTGAAGATACCACAGTAAAGA  
GATGTAAACATTTAGGAAAACAATAAATGTAAGTATGAA  
>Dkk4|ENSMUST00000033936.7|Reference\_end location: chr8(+): 22627547  
site\_id: 446421, AMPLICON  
aggcgagcatgttacactcagcACATAAATAAAGCCCAATCTCCTAGCAACTGAGACAGA  
CAGCAAGCAGATACTGAGATGCTATACTCTGATGAGCCAGCGACTTTTGGCTTTGCGTCT  
ACTATCTACAGTACTGACAGGACTTTACAATAAAACAGCCCGACACAGTACTCAATCC  
GTTCAAATAAATCTTTTTTAAAAATTGAAA  
>Dvl1|ENSMUST00000030948.15|Reference\_end location: chr4(+): 155859296  
site\_id: 423612, AMPLICON  
TCTAAGGGTGGCAGCTAGTTACCCAAAGGGGCAGTTTGCATGCCCTTTCCCCACCTGCT  
ACTTGGCACATGACAACACAGTTTGTACTGAAGGTATGTGAAGGGTAGCTAGTAGGAGAG  
ACAGGAGAGAGACCTGGCACCTAGCCACTGTCTCAGTCTCAGTGGTGGGTGACAGTGAAC  
ACAAGAGCTGCAGAGCTGGGCCCTGTTCTGTTTCTGTTCTGGTGGCTGCCCATCATCATG  
TGCCACTGCCATCCCGGCACAGCGGCCCCACACATCTACACTAGACACTGTGTCAAAGTC  
TGAGTACTGGGTAGTTGACATAGAGCTGCTTCTGTGTAATGCTGCTTCTGTGTAATG  
CTATTTTAAACACTAAAAAAGCGTTTAATT  
>Dvl2|ENSMUST00000019362.14|Reference\_end location: chr11(+): 70010108  
site\_id: 461820, AMPLICON  
TCCAGGTGCCTAGTCAGCTCTCATGTTGAGGGTGGGTGGTGGTGCAGTGGTACCCTGGGAA  
GAAGAAGGTGTGGGCTGGGTACCCAGACAGCAGTCCAAGGAGGCTGGTGGTGTGTTGGG  
GACTGTGTAGCTGCCTTTGTTACTCTATTTATTTTAGTCACTTGTACAAAACACCAAATA  
AAGCAAATAGAGG  
>Ecml|ENSMUST00000117507.8|Reference\_end location: chr3(-): 95734149  
site\_id: 415002, AMPLICON  
GCTGTGACCTGTCTCCTGAAGATAAGCAAATCAACTGCTTCAATACCAACTACCTGAGGA  
ACGTGGCTTTAGTGGCTGGAGACACTGGGAATGCCACTGGCTTGGGGGAGCAGGGCCCAA  
CTCGGGGAACAGATGCCAACCCCGCCCCTGGGTCCAAGGAAGAATGAGTCAACCTGAGCC  
TCAGAGGATTAGATGGGGAACTCCGCCTACTCCACCCTCCTCGAACACTCATTACAATA  
AATGCCTCTTGGATTTGGC  
>Epyc|ENSMUST00000020094.7|Reference\_end location: chr10(+): 97681900  
site\_id: 458209, AMPLICON  
ACTCATGTATGTTTCCCACCTGATTTCAGTTAAGAGCAGAAAAAATATTAATGTGTTTG  
AAAGATATATGGTCTTGTGAAAAAGTATTTCTTATAATTGTAGTGTGCAAATAACTATGT  
AATAGCAGTATACATTCTTCAGTTTCTAATGACATCTATCATCTATAAGAACATCAACT  
CATTTTGCAAACCTTGGTTAGTTGACAGCTACCTGTATTCTCTACATACAAAAAATAAAA  
TATGAGATATAGAGC  
>Esm1|ENSMUST00000038144.8|Reference\_end location: chr13(+): 113218097  
site\_id: 471182, AMPLICON  
CACAAGAAGAACTGTTGTCTCCGCAATGCTGGGAGATATTTGCAGAGTATTTTATTTGGA  
GTGAAGAAGTATTTAAGAAGTATTTGCTTATTTCTTATATTTTATTCTCAAACCTTGC  
CAACAGAGTTGTGAATGTACTCGTGGGAAGATCCGTGAATGTAAGCGCAACCGGCTGTTA  
GGTTTTGTCTTAAAAGAACGGTGTATTATTGTTCAATAAAAAATGGCACAGCTGT

>Fbn5|ENSMUST00000021603.8|PolyA\_1 location: chr12(-): 101749960 site\_id: 1111138, AMPLICON  
TGCTGCTTTGCAAAGTCTCATGGGCTCGTGGGAAATGCTGGGAATAGCTAGTTTGCTT  
CTTGCATGTTCTGAGAAGGCTATGGGAACACACCACAGCAGGATCGAAGGTTTTTATAGA  
GTCTATTTTAAAATCACATCTGGTATTTTCAGCATAAAAAGAAATTTTAGTTGTCTTTAAA  
ATTTGTATGAGTGTTTAACCTTTTCTTATTCATTTTGAGGCTTCTTAAAGTGGTAGAATT  
CCTTCAAAGGCCTCAGATACATGTTATGTTTCAGTCTTCCAACCTCATCCTTTCTGCA  
TCTTAGCCAGTTTTTACATAGACCCCTTAATCATGCTTCTTAAAGAGTTTTTACCCAAC  
TGTGTTGGAAGACAGAGGTATCCA

>Fbn1|ENSMUST00000028633.12|Reference\_end location: chr2(-): 125300599  
site\_id: 1272890, AMPLICON  
GTCATTCCTGTCAACAAGGGTTAATGTCATGATGTCACAATAAAGTGATCCTCCCCTCC  
CTCCCATTTTAGTTTACACCTTGGTTTTATGTTCTTGTGTGGATTAAGGCTGGAGGGGC  
CTTCTGGAGGTGAAATAAAGTCTCCTGGGTTTTAA

>Fbn1|ENSMUST00000028633.12|PolyA\_1 location: chr2(-): 125300943 site\_id: 1272891, AMPLICON  
TTGCTTCTCCGAGTGCAAGCAGTAGGTTTCTGTTGTCTGTTTGGTGCTAGTAAATTCTCA  
AAATAGATTTTATTGATGCACTGTAATAAAGACACGAGTTAGGAACCAAATTGCCAAGTAC  
TCAGTTCAAATACTTCATTTCAATCAACCAAAGTTAGTTCAGTAGCTTATCTCACTTATG  
AGTATGGTGCAGTACATGTAATAAAGTGTGTGTACACTGTAACGTGCTATTTTTTATCAT  
TGAAACATTTATAAACTACAATAATAAAGCCCTTAATGT

>Fzd1|ENSMUST00000054294.6|Reference\_end location: chr5(-): 4753896  
site\_id: 423783, AMPLICON  
GCAGTCCCTCCTGATTGTAGTGTTTAAACCTTAAGAGTTTATCACAAATGCCGATACATAC  
ATAGGACCTAAATTTATCTATGTCTGTCATACCCTAAAAATGACATTGGTTTTTTGGATTG  
GTATGCattattattggttattattggttattattattCTCACCACCATGAGATCATCTATA  
TTTATAGAGGAATAGAAGTTTATATATATAA

>Fzd10|ENSMUST00000117102.3|Reference\_end location: chr5(+): 128604098  
site\_id: 429051, AMPLICON  
GGCAAGAAAAGAAATCATCTAACAAAAGAATTTAGAGGCTCAAGCCTCAGGGTTGGGGGT  
TGGGGGGGCGCCTTCAGCCTGATACATTTTGTGGCTTTTTAATGGAAACCAAGCCAGTGT  
GTTCTACACACTGGGACTGATTTGTGGAGAGGAAGGGGGAGGGGGGAAGCCAGTGGAGA  
GCACCAGAGGGCTTATTGACTCTCTGAATTGTTAAACAAATGATTTCCATGAGTGGTCTT  
GAAGCACTTGGGAAGACAAACTTTGTCTCCAGCCAGGGAGGGCCATGCCTGCCTCTGTAT  
ATCTGTAATATAGGATATTTTTCATGCTCCACTATTTTATTAATAAATAAAGACATTCCT  
TAGTTT

>Fzd2|ENSMUST00000057893.6|Reference\_end location: chr11(+): 102608056  
site\_id: 464355, AMPLICON  
AGTTAGCGGCCTGAGAGATGTTCTATAAAGTATCTTTGTTAGTGTGAGAATCCCAGTTTC  
CAGCAGGCATGGGTTCCCTCGAGCCTGGAGTACTTTACAGCTTGCATGCTAAAGAAGCGA  
TCTGAAGACCAGTGTGCCAGAGCTCCGCTCTCAACCGTCTCCTGTTTCTTGATAATAA  
ATAGTCAAATTAACCTAATAATCATCATAATAAAGTGCATTTAATTATCT

>Fzd3|ENSMUST00000131309.2|Reference\_end location: chr14(-): 65192449  
site\_id: 1331290, AMPLICON  
CTTCTCCATGTGTCTGGCTAAAACAGATCATTTCAGAAAGAGTGGAAAGTTACTGTTGTTG  
GGGTCTGTGTAGGGCGGGCACACCCAGTTAGAGCATGGGCTGTACTGTCACGGTAGCTG  
GGTGTGCTCTGCACTCTGCTGTTGTAGATTTATTTTGTTTACAGTAGACTGATGTCAGTT  
TTGTAAATGTTTTTCTTAGCACTTTAACTGTGAGTGTAAAACTGATTTTAAATGTAGTG  
GTTGTATATTTTGGTTATAAATTGGAAATTTTAAATAAACTAAATAACTTGT

>Fzd4|ENSMUST00000058755.4|Reference\_end location: chr7(+): 89413093  
site\_id: 441958, AMPLICON  
ACCAGAAGGCAACCTGGGGATATTGAGATGACAATGTAGAGGTACCAGGCAAACCCCTGC  
TATACATTTCTCTGAACAAATCACTGAATTTCCAAGGAAATAGATCCCCCTTTAAAGGATG  
TACAAAAGTGTGTCTGCATTGATGTCTGTACTGTAAATTTCTAATTTTACTGATTTAA  
AAAAACTTGTCTAT

>Fzd4|ENSMUST00000058755.4|PolyA\_1 location: chr7(+): 89409399 site\_id: 441959, AMPLICON  
TTACCTTACCGACCCTAGAGACCTATTGCATTAAGCAATGTTAAGCAATTGGGACTTAAA



ATATTTTAGTTTGTGTGATTGCATCTAGGCAGACGCCAGTCTGGAAGAACTGAAATGTTA  
AATTTCTTGGCAACTTTGCATTCACACAGATTAAGTGTGTAATTTGTGTGTGTCAATTAC  
AATTTAAAGCACATTCTTGGACC  
>Fzd5|ENSMUST00000063982.6|Reference\_end location: chr1(-): 64730566  
site\_id: 399323, AMPLICON  
GTCTTGGAGAGACGTTTGGTTTGGTTTTGTGCCTGGGAGTCAGTCAGTACAACAGCAACT  
GTATGTGCTTATGTTAGTCTCAAGATCCTTAAGTTGTTGACCTTATTATTTTGGAAATTT  
TTTTGTATTATATTTGTGGGAAGGTAAAATAATGATTTTAAGATTTTTATCAAATATGGA  
GATTAGTTATTTATGAAAAACAAAGAAATGTCTATTTTGTTCCTTTGTTCCCAATTAAT  
GTAGATAACTTTTTAAAATGCATTAAAGCAATGGTGAAGAA  
>Fzd6|ENSMUST00000022906.7|Reference\_end location: chr15(+): 39038187  
site\_id: 474976, AMPLICON  
ATTCCCTATCTGCATCTAAGCCTGCAAAAGAAAATGTGCGAAGGGCAGAGTCAGAGTTGGG  
CAGGAAGAGTGTAGTGCAGCAGATGCAGCGTGAAGACACTGAAGGTGCTAAGACAGCGTC  
TCAGTGCTGGTCCCTTAAGGATTATCTCGCCAGCGAGGTTTTCTTAGATACTTTGATC  
CCATTGGAGCTCTGTTAAAGTTAAAATGAAAATTATCATGTACTGTATGGGAAATGTAA  
ATACTAACTTTTCCACATATGTAAACTTCAGACACAAATTTTTTTGTGTGTTCTTTTCAT  
CAATAAAATTTTCTTTGT  
>Fzd7|ENSMUST00000114246.3|Reference\_end location: chr1(+): 59486945  
site\_id: 1110103, AMPLICON  
GACAGATTACTTCATATGTGTCCTGTTTCAGTTGAATGGAGCTGCTTTTACAATTAAGTG  
ATCTTGTATTTTTTAAACTTTCAAAGTGATCTCACCTGTCAGAATTTTTTTAAGCTGCCA  
CTACACAGGTTTGGCATCTTTTGTGTTTTATCTCTTTAAGTGCATGTGAAATTTGTAAAA  
TAGAGACAGTGCAGTATGTATATTTGTAAATCTCCCATTTTTGTAAAGAAAATATATATT  
GTATTTATACATTTTTACTTTGGATTTTTGTTTTGTTTACCTTTAAAGATCTACAATGAA  
GCCCCACTTTATCACATGTACAGATCACGAATAAATTT  
>Fzd8|ENSMUST00000041080.6|Reference\_end location: chr18(+): 9218137  
site\_id: 1327188, AMPLICON  
TGGCTGCGCAGATACCACTCTAACCTATGTAGCTGTGTTCTTGACTACTACATGAAAAAA  
ATGTTAAGACTCATCAAATATTTGAGGGTAGGCAATGTGGTTGTTATATGTCCAGAGGAT  
TGAGGTAATATAATCTAATGTGATTAAAACAAACAGGAAAC  
>Fzd9|ENSMUST00000062572.2|Reference\_end location: chr5(-): 135248938  
site\_id: 429404, AMPLICON  
CTAGGCTGTGAGTTATGGTTGCTCCCTCCTTGCCCTCCCCTCCCCCTTCAGAGACAGCT  
GACTAACAGCTGCCCAGCTGTCAAGGTGAGACAAGTGAAGACACAGGGGGCTGAGGACTAG  
GGTGGGGACCCAGTAAAGCTCAGGGCCTTGACCTTCTGTCTCATGCAGGGAGTGGTCCTA  
GTCCACAGAGGGTCCCAGGATAAGAAGGGGCAGAAGGGGGCAGGGTCCAGTGCAGAGTTA  
TTTAATGATGTAATTTATTGTGGCATTCTCTGGAAGCTGTGACTGGAATAAACCCCTCGT  
GTGGC  
>Gja4|ENSMUST00000053753.7|Reference\_end location: chr4(-): 127311425  
site\_id: 421568, AMPLICON  
GGTTTTTCATCACACCCCACTTCTCCTGGGAAAAGCACTGATGCAGGCTGCTGGCTCAGC  
CTCGTCACCTGGACAGACACAGCCTGCGCCGGAGCTGGCCCTTGCCAGGGGAACTGGTTG  
ATGTCTTGTTTTTCTCACTTCTAGTTCCACTGTTTATGATCCTCAAATAAACAGGACTCC  
ATCA  
>Gsk3b|ENSMUST00000023507.12|PolyA\_1 location: chr16(+): 38245439 site\_id:  
1123014, AMPLICON  
CAATTAGCGTGACCACTTCCATCTTAAAACAAATCTAAACAAAATTTATTATTATTATA  
TATATATAAAGGACTGTGGGTTGTATACAAACACTATTGCAAACACTTGTGCAAATCTGTCT  
TGATATAAAGGAAAAGCAAACGCTGTGTAACATTACTACTTGAATGCCTTTGTGACTGAA  
TTTTTTTTTTCATTTTAAATATAAACTTTTTTGTGGAAAGTATGCTCAATGTTTTTTCC  
CCCTCCCCCATTCCCTTGTAATAACATTTTGTCTATGTGACTTGGTTTGGAAATAGT  
TAACTGGTACTGTAATTTGCATTAAA  
>Gskip|ENSMUST00000051934.6|PolyA\_1 location: chr12(+): 105701922 site\_id:  
1111387, AMPLICON  
GCAGTGCTTTGGTATTCTACAGCGCCCTTCTTCCCCAGCAGTTGGACAGTGCTCTGTCT  
CATTGCCACATGAACAGTGAACATGAGTGCATTGTATGGTTGAAACCAAAGGATGAAT  
GAAGCATTCCAGAACTTGATATTTAAAAAAGAGATGCTCTGTATTTTATATTTTATTACA

GTCCCCGGTGTTTATAAACGTAATAAAGTCCTCCGTGCTG  
>Hey1|ENSMUST00000042412.4|Reference\_end location: chr3(-): 8663382  
site\_id: 411912, AMPLICON  
CAACCCGATTTTCTTAGAACTCCCATATTTTCTTTTAAAGTGGAATTTTTATGTTGTGTT  
TTCTTTTGGTGCATGAAAATGTGGTCTTGCAGTACTTAAAAGGGCTTCTCTGCCTTCT  
CATTCATTTTTAAAATTTGATTTGGGCTCTAAAAGTATTGTTTTACAGGCTTACCCCTT  
TAGAAGGTATAATTTGAACAGCTCCTCTGAACTAGGTTTGACCTCTGTTGTATTGATGTG  
TTGTGACTAA  
>Hlf|ENSMUST00000004051.7|PolyA\_1 location: chr11(-): 90338566 site\_id:  
463297, AMPLICON  
TGTTTCGCTTTTCGGCCTGTGTATCTATCTCACGCAGTGTAAGGTTGACCTCGGTGCTATGT  
GTACGGCTTAGAGTTTGTAGCTGTTTTGACTTTAAAGATGGCTGTTATTTTTGTTTCACT  
GAGTTGTATAATGTCAAGAGAGTCTGCTGTTTTCTTCAAAGCACATTTTTGTGCTCGATT  
AAAATCCCCTTCCATCC  
>Igfbp7|ENSMUST00000163898.5|Reference\_end location: chr5(-): 77349266  
site\_id: 1288324, AMPLICON  
GATGCCCTCCATGAAATACCACTGAAAAAAGGTGAAGGTGCTCAGTTATAACCTGCGAAT  
CCATGAGCCTCTGTAGCTAAAGGTGCTCTCAGACAGCCGACAGCTATAACCTGCTCTTG  
CCTGACACACTTCTCTTAACCTAACCCACTAACACTTTATTACAGCCAGCTGGTTTTACA  
CAGAGAAATCAAAGATAACACATCAAGACTATCTACAAAAATTTATTATTTACAGAAAAA  
AGCACATGTAGCTTTAAACAAAAACAA  
>Kcnk2|ENSMUST00000193319.5|Reference\_end location: chr1(-): 189209790  
site\_id: 403939, AMPLICON  
GACTGGCTACGGGTGATCTCTAAGAAGACGAAGGAAGAGGTGGGAGAGTTCAGAGCGCAT  
GCCGCTGAGTGGACAGCCAATGTCACGGCCGAGTTCAAGGAAACGAGGAGGCGGCTGAGC  
GTGGAGATCTACGACAAGTTCAGCGTGCCACATCCGTGAAGCGGAAGCTCTCCGCAGAG  
CTGGCGGGCAACCACAACCAGGAAGTACTCCGTGTAGGAGGACCCTGTCTGTGAACCAC  
CTGACCAGCGAGAGGGAAGTCTGCCTCCCTTGCTGAAGGCTGAGAGCATCTATCTGAAC  
GGTCTGACACCACACTGTGCTGGTGAGGACATAGCTGTCATTGAGAACATGAAGTAG  
>Kdr|ENSMUST00000113516.1|Reference\_end location: chr5(-): 75932835  
site\_id: 426463, AMPLICON  
ATGCAGCTATATACCCTACCGTCTCTCTCATCTCAAAACggaggaggaggaggaggagTCA  
GGTATAATGTGAGTGTGTTCTACGTGTCCTTGTCTCTGTTCTTAGGAGGAATGATTTCA  
TCAAAATGTTTATATGCTTTATAAACCAATAAACGTATTCTGAGT  
>Kit|ENSMUST00000005815.6|Reference\_end location: chr5(+): 75656718  
site\_id: 1288216, AMPLICON  
ATGGATGTCAGGTAAGGGGCCACACCATTGAGAATTTTGTCTTGGATATTCTTGAA  
AGTTTATATTTTTATAATTTTTTTTACATCAGATGTCAGATGTTTCTTTCAGTTGCTTGA  
TGTTTGGAAATTATTATGTGGCTTTTTTTGTAAATATTGAAATGTAGCAATAATGCTTTT  
GAATATTCCTGAGCCCATGAGTCCCTGAAAATATTTTTTATATATACAGTAACTTTATGT  
GTAAATAATACGCTGTGCAAGTTTAAACATGTCACGTTACATGTGGGTTTTTTCTGATAT  
GTTGTCCAAGTGTGACAGTTCTGAAGAATTCTaataaaaatgtaaatatataaa  
>Kitl|ENSMUST00000105283.8|Reference\_end location: chr10(+): 100100402  
site\_id: 1319857, AMPLICON  
GTGATTATTGTGCTCTCTACCCTGTTTTTTAAGTCAATGGACTTGAGAAGTATTCTGA  
CATTTATATGGCTTCACAGATATATTGCTAGTTCAGTCATAGATTGGAGTTTGCATATTG  
TAATGTAAGTGTATGTCCAACACTATTCTAAATAGTTTATGACTGAAGTTTAAATTAATA  
AAAGGTTGTAAAatgtgatgtgtatgtgtatataactgtatgtgtaCTTTTTAAAATAGGT  
ATATGTCCCGACCCTTTTGATACAGGTTTGAATTTGAAATTACATTATATAAACATATAC  
TTTATTGTTCTAAATAAAGAATTTT  
>Kitl|ENSMUST00000105283.8|PolyA\_1 location: chr10(+): 100100272 site\_id:  
1319858, AMPLICON  
GTGATTATTGTGCTCTCTACCCTGTTTTTTAAGTCAATGGACTTGAGAAGTATTCTGA  
CATTTATATGGCTTCACAGATATATTGCTAGTTCAGTCATAGATTGGAGTTTGCATATTG  
TAATGTAAGTGTATGTCCAACACTATTCTAAATAGTTTATGACTGAAGTTTAAATTAATA  
AAAGGTTGTAAAatgt  
>Lef1|ENSMUST00000029611.13|Reference\_end location: chr3(+): 131224320  
site\_id: 416684, AMPLICON

ATCTCCTTTGAGCGAACCCGTTTGCAGTTCATTTTTTTAATCTCTTTCTTTTCACTCCTG  
TAAAAAGCCCAGCACTTGAATTGTTCTTTCTTTAAATGTTCTGTGTTTGTATCTGTTTTT  
ATTAGCCGATTAGTGGGAATTTATGCCAGTTGTTAAAATGAGCATTGACGCACCTGTTAT  
TTTTTTTTTTTTAAATAGCAAGGCACAGCCTCTGCCCAAACCTTGTCTATCTTAACGTTTG  
TCATTCCAGTTTGGAGTAAACGTGCTGAGCATTTTTTTAAAAAGAAGCTTTGTAATAAAACA  
TTTTTTTAAAAAG

>Lep1|ENSMUST00000102777.9|Reference\_end location: chr4(+): 101792258  
site\_id: 420218, AMPLICON  
ATGACGCAGGGCTGTATGTCATTGTACCCATAATTATTTCCCTCTTGTGTCTACTGCTCG  
GAACACTGTTAATTTACACCAGAGAATGAAAAAGTTGTTTTGGGACGATGTTCCAAACC  
CCAAGAATTGTTCTGGGCACAAGGACTGAATTTCCAAAAGGTCCTGTTTAAAGTATTTT  
AACCCAGATATCTAAGGTTGCAGTTTAGATGCCACAGTACTTACAGATCTTTAAACAAC  
TTAAAGGGCTTTATGTTGTTGTGTTTCATGTTCTCAAGCCTGTTTCATCCTTTCTCTTTCTC  
AAAAGCTGGGTTTGGGATTTGATCAGAGAAAACAAAGTTCGCTCCCTTA

>Lgr4|ENSMUST00000046548.13|Reference\_end location: chr2(+): 110014220  
site\_id: 1272187, AMPLICON  
CCTTGCCTTGTAATAGTCTTGGTTGTACATTGTCAGTGGAATAAAAACAGAATCTTTGT  
ATATCAAATCACGTAGTTTGTATAAAATGTGGGAGGGATTTATTTACTGTGCTTGTAAT  
TTTGTAAGGTCATCTATTTACAACATAAATATAATGTTTGTATATTTACACATCTGATAA  
ATATTAAATCATAACTTGGTA

>Lgr5|ENSMUST00000020350.14|Reference\_end location: chr10(-): 115450311  
site\_id: 454434, AMPLICON  
CCATGTACAGTAGCCTATTCTCCCAGACATATTGTTTCTCTGCCAATTTCCCAATGCAT  
TAACTGTACATAACACATGTAAATACGTAGTGCTTGTAAATAGATCCAGAATTTGCTTTT  
CTACTGGGCTCAAATAAAATTTGTAATAAAATGTGTGACTTGCAAAACAAA

>Lgr6|ENSMUST00000044828.13|Reference\_end location: chr1(-): 134983305  
site\_id: 401712, AMPLICON  
AAGAGGTAGTAGGAACCGCCATCTTCCCTAGCTCCAGTCCCTCTGACTACCTCTGCTCTGG  
GTTACCAAGTTCTCCCACCTAAGACCTACCACCTCCACCTCCTTTCTGGGTTCCAGTCCC  
ATGCCATCACCACCCAGCCATGTGAACATAACAATTGTCAAGATGTAAATATCCG  
GTTTTTCTGTATAGTAAAGCACCTATGAA

>Lrp4|ENSMUST00000028689.3|Reference\_end location: chr2(+): 91513767  
site\_id: 407876, AMPLICON  
GTCTTGTGTCTATTAGCTAGGCCAGATATATGTCTGCACACAGAGCCAGAGCAGGCCAA  
TGGCCTTTTCCAGTAAACCAATTGAGAAAAGTACAGTGCCACTTCTAAGAGGAAAAGATGG  
ACATTTACACAGAATGAGGCAGCACTTGAGCCTTTAAATCCATAGTTGGGGAGGAGGGG  
GGGGGGGGAAACAGAAGCGTGGTGTCTCTCTGAGTGGAAGGGGCAAGGATCTTTTTCG  
ACTTGGGCTGTTTCAAATGTAGAAAGGACGAATTTGAGGAAATATCTATTTGAGCACTGA  
TTACTCTGTAAAAGGGCAAAAATCTCTCTGTCTTAACTAATGGAAGC

>Lrp5|ENSMUST00000025856.16|Reference\_end location: chr19(-): 3584831  
site\_id: 1249376, AMPLICON  
AGCAGCAAATACTACCTGGACTTGAATTCGGACTCAGACCCCTACCCCCCCCCGCCACC  
CCCCACAGCCAGTACCTATCTGCAGAGGACAGCTGCCACCCTCACCAGGCACTGAGAGG  
AGTTACTGCCACCTCTTCCCACCCACCGTCCCCCTGCACGGACTCGTCCTGACCTCGG  
CCGTCCACCCGGCCCTGCTGCCTCCCTGTAAATATTTTAAATATGAACAAAGGAAAAAT  
ATATTTTATGATTTAAAAATAAATATAATTGGGATTTTTAACAAGTGAGAAATGTGAGC  
GGTGAAGGGGTGGGCAGGGCTGGGAAAACCTTTGTACAGTGGAGAAAATATTTATAAACTT  
AATTTTTTAAAAACA

>Lrp6|ENSMUST00000032322.14|Reference\_end location: chr6(-): 134446500  
site\_id: 435949, AMPLICON  
TCATTGTCTTAAAGTCAGCTGGTGTCTTCTGTACATCGACTTTGGAATGATGGTGCTTTG  
CAAGGATGTATTTATATTATAATGGCCAACATTTGGTCAGCCCTTGTCCGCTTATCACT  
TCCCCCTTTTGTAAAATAAGTGCTTTAATTATAAACTGTATAAATACCTTGTATAACCC  
CCCCCTTTTGTATTATTACAAACAGCTGAATTGTAACAAATGAAATGTTGATTTTATA  
ATAAAACAGTGGGA

>Maf1|ENSMUST00000099126.4|Reference\_end location: chr2(-): 160363708  
site\_id: 1274317, AMPLICON  
ACTTGCCGCAACGCAACAGAAATTGTTTTTAAATTTTCATGTAAAATAAGGGATCAATTTCA

ACCCCTGCTTATGATATGAAAATATTTAAATCTAGTCTTATTGTAGTTTTAATTCAGAC  
TGGTTTCTGTTTTTTGGTTATTTAAATGGTTTCTATTTTGCTTATT  
>Matn1|ENSMUST00000102576.3|Reference\_end location: chr4(+): 130955475  
site\_id: 421811, AMPLICON  
CGACTGCGTTCGTTATTTTTCCAACCTAAAGCTTAATATATTCCTGTTTTTTTTTTCCTC  
CAGTTAATTCTTTACCCAGTCAGTCTTTACTCTGAGAGATTTTTTTTTTTGTTTGTCT  
TGAGAAAAAATAAAAAACAATTAATGTGGTTCGCTGTACACCCTG  
>Mecom|ENSMUST00000173495.7|Reference\_end location: chr3(-): 29951336  
site\_id: 397140, AMPLICON  
AGCTTGTGCGATGATGTTATGTTTCATGTTAATCCTATTTGTAAAATGAAGTGTTCCTGAC  
CTTATGTTAAAAAGAGAGAAGTAAATAACAGACATTATTCAGTTATTTTGTCCCTTATCG  
AAAAACCAGATTTTCATTTTTCTTTTTGTTTGTGATCTCATTTGGAAATAATTGGCAAGT  
TGAGTACTTTCTTCCCATGCTTTGTACAATATAAACTGTTATGCCTTTCAGTGCCTTAC  
TGTGGGAGGAGCAACTA  
>Mgp|ENSMUST00000032342.2|Reference\_end location: chr6(-): 136872441  
site\_id: 436090, AMPLICON  
GTCATTTGGTTGTGGAGTTTTCGTTTTATATCTCCTGCAGTAGCATTACTGAAGTATACAG  
ACACGCATGTGTTGCTTGCCTTACATGATCTCCTAGCTGGCTGGCCACTCCTTCCTT  
CTGCGGGTTGAAAGTAATGAAAGAACAGTATTAAGAAGTGTGTTTATATATAATAAAATT  
CTGGTTGATAC  
>Mki67|ENSMUST00000033310.8|Reference\_end location: chr7(-): 135689785  
site\_id: 444897, AMPLICON  
CTACTGCTACTGCCTGAGTTTAAAGGAAGGAAGCTTTGAGCTTTCCTGGTCATACTCTCTT  
CAGACGCCAATGGAGGTCATGAGGAAGATCACAGGGATCTCAGCGCAATTACAGTTTAG  
GGGTGAGCAGGCAGAAATGTGGCCCTCTGTCTATCCAATAAAGCTCTGAAATTCGCTGC  
C  
>Mmp13|ENSMUST00000015394.9|Reference\_end location: chr9(+): 7283329  
site\_id: 1310304, AMPLICON  
GATCCAGCTAAGACACAGCAAGCCAGAATAAAGACTGTGCCAGCTGGTCAGTCGCCCTTT  
TGAGACCACTCCTTTGTGCTCCACCATGTTTGTAAATCCCTCTCTGCTTTCCTTAGCGAG  
TAACACTTGGTGCTTACTGATGTGTGAAAAGCTATTGTGTCAAGAGACAGTGTAAATTA  
ACTGGGAAAATACAAAAGAACTGTTTTTTTGAATAATATGTTAGACTGTATTTATGTTGT  
TTCTAATAAAAAATAAGTGTTTTCAGC  
>Mmp9|ENSMUST00000017881.2|PolyA\_1 location: chr2(+): 164955120 site\_id:  
410930, AMPLICON  
GAACTCACACGACATCTTCCAGTACCAAGACAAAGCCTATTTCTGCCATGGCAAATTCCT  
CTGGCGTGTGAGTTTCCAAAATGAGGTGAACAAGGTGGACCATGAGGTGAACCAGGTGGA  
CGACGTGGGCTACGTGACCTACGACCTCCTGCAGTGCCCTTGAAGTGGGCTCCTTCTTT  
GCTTCAACCGTGCAGTGCAAGTCTCTAGAGaccaccaccaccaccacacacaaacc  
caTCCGAGGAAAGGTGCTAGCTGGCCAGGTACAGACTGGTGTCTCTTCTAGAGACTGG  
GAAGGAGTGGAGGCAGGAGGGCTCTCTGCCCACCGTCCCTTCTTGTGGACTGTTTC  
TAATAAACACGGATCCC  
>Myc|ENSMUST00000022971.7|Reference\_end location: chr15(+): 61990352  
site\_id: 1119839, AMPLICON  
GTTCTTCTGACAGAACTGATGCGCTGGAATTTAAATGCATGCTCAAAGCCTAACCTCAC  
AACCTTGGCTGGGGCTTTGGGACTGTAAGCTTCAGCCATAATTTAACTGCCTCAAACCT  
AAATAGTATAAAAAGAACTTTTTTTTATGCTTCCCATCTTTTTTCTTTTTCTTTTAAACAG  
ATTTGTATTTAATTGTTTTTTTAAAAAATCTTAAATCTATCCAATTTTCCCATGTAAA  
TAGGGCCTTGAATGTAAATAACTTTAATAAAACGTTTATAACAGTTACAAAAGATTTTA  
AGACATGTACCATAATTTTTTTTATTTAAAGACATTTTCATTTTTTAAAGTTGATTTTTTT  
CTATTGTTTTTAGAAAAAAATAAAATAATT  
>Myh11|ENSMUST00000231567.1|Reference\_end location: chr16(-): 14194648  
site\_id: 1422024, AMPLICON  
GACTGCTTAGCACTTGTGTCCATTCGTTCTCAAGTACAGAAATCACTCCACCCCTCACC  
AGGAGTCAACCACAGCCCTGCACAAAGGGTGTGAATTCAAGTCTTAGATGGGCTATCAG  
AGAAAAATCCAAATAAGACGTACAGGTCAGGAGCCACAGTACCAGCAACTTTGTTTACA  
TGAAATGAGGAAGTTACATGAATGGGTGCCACAGCCCCCAACCCACTCCCAACCTTTCCC  
TGACCTGCCTGACCTTCCAGTTGGGAGGAAATCCCGTTTGAATTCCTTCCCTTCC

TGCCTGCCACACCTCAGACACACAGTTCACCTTCGCCCAAGTGAC  
>Notch3|ENSMUST00000087723.4|Reference\_end location: chr17(-): 32120825  
site\_id: 1461884, AMPLICON  
GTCTTGTCTGCTCAAAGCCTCAACTCCAGGCTCACCTCCAGAGCCTGGCTCACCTTTTA  
GGGCTGGGGTGGGGGGGCACGTCAGGGGAGATGTATTTTGTATGCATTCCACTTCTAAT  
TGTAATAACAGGGCAGAAGGTGGGAGTGGCTCTCCCTCTCCTGTTGTTCTCTGGCTCA  
GCCTGCCTAATAGAAATGTTTTTAGGCTGTTTTTGTAAATATGGCACCTGGTCACAGTCCT  
TTGTAGCTGAATTCAGGCTCCTGCACTGTACAACCTCACCTTCTCAGTTCCCTTACCA  
CCTAATAAAGGAATAGTTAATAC  
>Nrarp|ENSMUST00000104999.3|Reference\_end location: chr2(+): 25183329  
site\_id: 1268681, AMPLICON  
GACACTGAGACAAGCACAGATTACTTCAAAGGAGTCTGTATGGTTTTTCTACACGCAA  
ATGCCTTTTTAATTATGTTAATTAATGTTAAAACGTAAGGCTATGTTGAAGCTTCAG  
ATGGTCCCTGGTTGGTCTCTTCTATCTGTATGAAGTCTGTGGCACACTCCTAAGCGTACG  
ATATAGACTTGTAGCCCATCGTGAAAATTTATAAATAAATTTTTTCATTGGTCTTTTTAT  
A  
>Panx3|ENSMUST00000011262.3|Reference\_end location: chr9(-): 37659902  
site\_id: 1311444, AMPLICON  
AGTCCCATCGATCCACTTCTATACATTCTCCATTCACTGTTTCCTCCTGGCATCTAATTG  
TCACAGCTTAGCTCTGATTCAAAGACGGTGTCTATCCCCAGTACCCTCGTGAAGCTTTA  
ATAAATATTTTTAAACTGTATATTATGTATTTCTTGAGAGAATTTTTTTTATACAAGTCAT  
TTAGATCCCTCTTCATATAGGTAATAGAAAAGTCAGGTTGCTTCTGACAAATTCATGTCA  
ATTGCCATAAAGCAAGCCAAGAGCTTATAGATGTTTACAGATGACATTAATAAAAAGTTTC  
ATGTCA  
>Pecam1|ENSMUST00000080853.10|Reference\_end location: chr11(-): 106654220  
site\_id: 1326097, AMPLICON  
GTCACCTTGAAGACAGACCTCAAGCCAGCAATGGCAACTGGAGCGAGCACTTAAAGCGCAC  
CTTGATCTTCCTTTCCGTTCCATGCCGAAGGCCAAAGAAGAGAAATGGCTGGCTACAAC  
AACTGTTATTATTTTTTAAATAGTAAAAGGAAATATGTACTTTTCTCACTAATTTTTCTT  
TATTTATTCCTCCACTAAAGAAAACGGTTTCCTAAGGTCTGAGCTGTTTCCCAGGGTGGGCT  
AGAGTGGGTGGGCAGGAGCTGCCGACATTTTGTGTACTATACCTAACCTCCTCGCCTTC  
TCCGTTTGCCTCAGCCACCCGGCTCCAGGGCCCCTGAGGGGAGTTGTATTAATAAAAATT  
GATTTTTACTCTT  
>Postn|ENSMUST00000073012.12|Reference\_end location: chr3(+): 54391016  
site\_id: 1276553, AMPLICON  
CACACAGTTACCTTTCCAGGGGAGGCTAAGGTATCAAAGGGGTGTTTCAGTTATACAACA  
TGCAAACAAACCTACCAAATTACGAACAGTGGTGTACATATTTCTCATGCAATGTGGGT  
TTCTTGCTAAATTTTGTATTTTACACTTGATTTATATCCTCGAGATGATTGTCATAAG  
CTTCTTGCAATACAAATGTTTTCTCTCAAACATTTCAATAAAACCATTCTTCAGGTATAA  
AGAGAATTACTGCAGAGTTGGTAATTCAGAAAACCAAGGTTAAGTTAAAAGTGAGTTT  
AGACTTTGGAATAGGACTTCATACCTTTTTTTTATTGTTAACAAGTAC  
>Prg4|ENSMUST00000161611.7|Reference\_end location: chr1(-): 150449887  
site\_id: 402130, AMPLICON  
TACTCGGTGCCCATGAGAGTTTCTTATCAAGACAAAGGTTTCCTCCACAATGAAGTCAA  
GTGAGTACAATGTGGAGAGGGTTTCCAAATGTTGTTACTTCAGCGATAACACTGCCTAAC  
ATTAGGAAACCTGATGGCTATGATTACTACGCCTTTTCCAAAGATCAATACTATAACATT  
GATGTGCCTACAAGAACAGCAAGAGCAATTACCACACGTTTCAGGGCAGACCCTCTCCAAA  
ATCTGGTACAACCTGTCTTGAAGTATTGACAAAGAAGAGTCATCAAATGAAATGAAGA  
AAACAGTGATACTTTTTGACATTGAAATACATTTTATTAATAAAGAATGTTGAAATGAG  
>Pth1r|ENSMUST0000006005.11|Reference\_end location: chr9(-): 110722154  
site\_id: 454922, AMPLICON  
CTTAGCCCCGCCTGCTTCTGCCACCACCAATGGCCACTCCCAGCTGCCTGGCCACGCC  
AAGCCGGGCGCTCCAGCCATTGAGAACGAAACCATAACCAGTTACTATGACAGTTCCAAG  
GACGACGGCTTCCTTAATGGCTCCTGCTCGGGTCTGGATGAGGAGGCCTCTGGGTCTGCG  
CGCCACCTCCATTGTTGCAGGAAGAATGGGAACAGTCATGTGACTGGGCATCAAGGGG  
CTGACTGCTGGCATGGGCAGATGGACAGATGGACCAAGAAGCCAGAGTTTGGCTGGCTG  
TCTATTCAGGACTGGACCAGGAAGAC



>Scrg1|ENSMUST00000034023.3|Reference\_end location: chr8(+): 57477581  
site\_id: 447511, AMPLICON

GATCGCAATTGTCACAACCTCCGGAGGGCAGAGCCGACCTGAAGCTGATAGATGCAAAT  
GTCCAGCATCATTTCTGGGATGGGAAGGGATGCGAGATGATCTGCTACTGCAACTTCAGC  
GAACTGCTCTGCTGCCAAAAGATGTCTTCTTTGGACCAAAGATCTCCTTTGTGATCCCC  
TGCAACAACCACTGAGGATCTGCCTTGCACTCTGGAGAACATGGTCCTGAAGGCCTTCAC  
GTCCCCTAATTTCCACAAACTCTGTCACTTCAGCGCCATTTCTGATATCCATCCAGTAT  
ATCCAATCTTGCATAGATTCTATAAAGTCTTACTTGCTAGAGTATACTTGGGCTAAAGTG  
GTAATAAAAAGTTGTTTC

>Sema3g|ENSMUST00000090180.3|Reference\_end location: chr14(+): 31230310  
site\_id: 1327400, AMPLICON

GTGGCATTGGACAGAGTCTAGGTTTGGCAAGCTCTGGGCAGGGTCTCTGGGGAAATGG  
CCCTGGAAAACACAGGAAAAGGAACCTCGGTATCCTAAACAGTGCACCCCTATACCTGGA  
AACATAGGACAGCTCTTGCCCACTGCCACCTTGCCACGGTACTGTACTACGAACACCCT  
GAAAACGCCACATGTGTGAACTGTGTCTGTTTTCAAATGGGCCTTGTGGCTTCTCCGTC  
TTCCAAGCATACTtattgaattggttgatatttttattgtcatggtGCCTTGAGTTCT  
GATGAGAAAAGCAGAGCCT

>Sgms2|ENSMUST00000090246.4|PolyA\_1 location: chr3(-): 131322738 site\_id:  
416694, AMPLICON

TTCTGCAGCTCTTCGTTTCAATTGATGACAAAGCCCCACACTGGAGTTCTGAAGAGGTGG  
CAAAGAACACGCCGAGCCTCTCCTCGCCTTCTTCACTTCCACGTTCTTTCCAGATTGCT  
TTTTTTCTCCCTTCAAGGTCAGAAGAGTTTGCTAACGTTTTGAATAAAATGTCTGGATAT  
ATAC

>Smpd3|ENSMUST00000067512.7|Reference\_end location: chr8(-): 106252550  
site\_id: 1309357, AMPLICON

TTATTTGTCCAACACCACCTGGAGTTTTAAGTATGAATATTAACCTTGATGCTTTTTAAC  
TATTGTATTAACCTTGCTCAGATTTAGAAATACTGTTTTAAAAGACAAAGAAGAACTTTT  
TTAATTTCTGTATTTTTTTTTCTGTATTGTATCCTATGGGACACTAGGGGTTTTATATGGT  
AAGACACCCAAGTTTTTGGTAAAACATTATCAAGTATATATCCAGACAATTCTTCCCTAG  
AAGAAAAACAATCTCTATGCCTGATTTAAAAAAAAGTCGAAAAGAGGTGGATTTTCCC  
TTTATGGTGTGAAAGGAAGACGGGAGACTGAGGAGAAAAATAACCCGTGAGGAGGCTCA

>Smpd3|ENSMUST00000067512.7|PolyA\_1 location: chr8(-): 106254960 site\_id:  
449646, AMPLICON

ATAGACCAGCCATGCCACGGTCTCGAGCAGTAGGGCCTCTGCCGGCCCTTCAAGCCACAG  
CCCGTGCCTGGGCTGTGTGCCCTCCATTGAGCACCCAGTGTGGGGGAAGGAGGGCAGGG  
GACAGGGAAGGACGAGCCCATCAATCCCCTGCAAGCCTGGGAACCAGGCTGCTCTGTGCC  
TCTGGGCCAACTCTGCGGACAGAGGACTTGGGCCAGCCTGGGAGCCCCCGGCTGCCGTGAC  
CAGTGCCATTCTTTCAGTCACGATTTTCTACAGAAATACACAGCACAAACCTAGTTTGTAA  
CCC

>Sox9|ENSMUST0000000579.2|Reference\_end location: chr11(+): 112787750  
site\_id: 464858, AMPLICON

CTGCTGTGGCTGGAGAGTATAAGGAATGCTtttttcttttttctttcttttcttttctttt  
ttttttAAGACAGCAGTCTTTTTTTTTAATTTAAAAAAAAGATATATTAACAGTTT  
TAGAAGTCAGTAGAATAAAACCTTAAAGCGTTCTTATAATATGGCATCTTTCGATTTCTG  
TATAAAAACAGACCTTTTAAAAAATATTTCTGTAACCTAAGAAACCTGACATTTATGTCA  
TATTTCTCTTTAGGTAAGATTTGGTTTGTGTGTCTTGTGTTTCCCTCTCCAAATT  
CTTCTTCTTTGTGCACCCTGCCTTTCTCCCTTCCATCCTTTCTTTTTTGTATATTATT  
GTTTACAATAAATATACATTGCATTAAG

>Sox9|ENSMUST0000000579.2|PolyA\_1 location: chr11(+): 112785920 site\_id:  
464859, AMPLICON

GACAACATATTGCAAATGGCCGGGCCACTCGTGCCAGACGGACAGCACTCCTGGCCAGA  
TGGACCCACCAGTATCAGCGAGGAGGGCTTGTCTCCTTCAGAGTTAACATGGAGGACGA  
TTGGAGAATCTCCCTGCCTGTTGGACTTTGTAATTATTTTTTAGCCGTAATTAAGAAA  
AAAAAGTC

>Spp1|ENSMUST00000031243.14|Reference\_end location: chr5(+): 104441047  
site\_id: 1289114, AMPLICON

GGCTCTTAGCTTAGTCTGTGTTTTCATGCAAACACCGTTGTAACCAAAGCTTCTGCACT  
TTGCTTCTGTTCTTCTGTACAAGAAATGCAAACGGCCACTGCATTTTAATGATTGTTAT

TCTTTTATGAATAAAATGTATGTAGAAACAAGCAAATTTACTGAAACAAGCAGAATTAAA  
AGAGAACTGTAACAGTCTATATCACTATAACCCTTTTAGTTTTATAATTAGCATATATTT  
TGTTGTGATTATTTTTTTTTTGTGGTGTGAATAAATCTTGTAACGAAT  
>Srgn|ENSMUST00000020271.12|Reference\_end location: chr10(-): 62494461  
site\_id: 1317872, AMPLICON  
CCCTTTCCTCATTAACTCGTAAGGAATTATGCTTTAATGCTGTTACCTATCTTGTGTTC  
TGGAAAATGCCTGCATTTATGTGTATTGAATCAACATTTAAGAAATTAACACACACCCCC  
ATTATTATAACAATAACTTTCAAAGCCATACTGGTTTTGAAAATTTTAATTTGATAGCAAG  
TTGATGAACAATCTTTTCATACCTAAAGTGTTCAGGAACCCAACCTCGCATTGTGAATTACA  
AATATATTCCTTTATGTGATTAA  
>Stabl|ENSMUST00000036618.13|Reference\_end location: chr14(-): 31139036  
site\_id: 471944, AMPLICON  
GATGACTTCTCCCATGGCAAGAAGGGACCAGCCCAACCCTGGTTTTCTGTCCCAACCCT  
GTTTTTGGCAGCAGTGACATCTTTTGTGAACCCTTTGATGATTGAGTCTGGAGGAGGAC  
TTCCCGACACCCAGAGGGTCCCTCAAGGTCAAATGATGAGCTGGAATGAAGCAGAGGCTC  
TGAGAAGACACAGACCATTTTTATTGCTTGTTCAGGGTGGCTGAGGGGGCCAATGGTCTGT  
CCAGGACAATAAAAGTGCCCTCAGCGGA  
>Stc1|ENSMUST00000014957.9|PolyA\_1 location: chr14(+): 69041321 site\_id:  
1330851, AMPLICON  
CTAGACCTGTTTGCATGATCTCCTCTCTTGTGATTTGGTTGCACTTTAGAACATTTTTGT  
GCCGTATTATTTGCATTATGTATTTATAATTTAAATGATATTTAGGTTTTTGGCTGAGTA  
CTGGAATAAACAGTGAGCATACTGGTATATGTCATTATTTATTGTTAAATTACATTTTT  
AAGCTCCATGTGCATATAAAAAGTTATGAAACATATCATGGTAATGACAGATGCAAGTTAT  
TTTATTTGCTTATTTTTATAATTAAGATGCCATAGCA  
>Tag1n|ENSMUST00000034590.3|PolyA\_1 location: chr9(-): 45930003 site\_id:  
1312216, AMPLICON  
TAGCCTGCCTCACAATGCCTATGTAGGTTCTTAGCCCTGACAGCTCTGAGGTGTCACTG  
GGCAAAGATGACTGCACATGGGCAGCTCCACCTATCCTTAGCCTCAGCCAGCATCTTA  
CCCCAGAGCCACCCTGCCCTGGCCCTGTTCCAGCTGTACCCCACTCTACTGTTCC  
TCTCATCCTGGAGTAAGCAGGGAGAAGTGGGCTGGGGTAGCCTGGCTGTAGGCCAGCCCA  
CTGTCTTGATATCGAATGTCTTTGAAGGAGACCCAGCCAGCCTCTACATCTTTTCTCCT  
GGAATATGTTTTTGGGTTGAAATTCAAAAGG  
>Top2a|ENSMUST00000068031.7|Reference\_end location: chr11(-): 98992994  
site\_id: 463882, AMPLICON  
AACTGGTTAGTCTAGTACAGATACAGTGCTCAACCTCTGACGTGATGCATTTTGTTTAA  
GCCATGAGAAGTTGCTCGTACCTTTTGAACATCGGAGGCTGGAGAAAGTCACCTTGACTG  
TGTCTTTATGACTCAGCACAAGCAGCAAGGTGAGGAAAGTTAGGTCAGTTACGTAGAGTA  
CTGACTCTACTCGGGATGCCTTCCCAACACGAGATCCCTGGGAGGAGGCAGGACTGCTCA  
CGGTTACATCTCCAGGATCAACCAGGAAGTGGGATCCATTGCAGATCTCCATAATCCAA  
CTTGTGACTGCCAAGACCTTCTGTGCTGTTGTCTCTTATTTAAGTGCTGTTATCAATGTC  
TTTTGTAAATATTTAATATGTCTGTCTGTTCCGC  
>Vcan|ENSMUST00000109543.8|Reference\_end location: chr13(-): 89657056  
site\_id: 470552, AMPLICON  
GTTTCATTCAGCGACACCTTCCAACCTATCCGGTGCCTAGGAAACGGGAGATGGGCAATGC  
CTAAAATAACCTGCATGAACCCATCTGCATACCAAAGGACTTATTCTAAGAAATACTTAA  
AAAATTCCTCATCCGCAAAGGACAATTCTATAAATACATCAAACATGAGCATCGCTGGA  
GCCGAGGCGGCAGGAAACCAGGCGTGATCCTTAAAATGGCGAACATGTGCTTCACTCA  
TCATTTAGCCAAAGTCCCTGCCTTTCCGTGCCTTTCTATCACCTCAAGAAGAATTAGAA  
GTTGGTTTGGATTATGGGACTGCCGTCTGGTCATTTGGGGTGGCTGTACTCTTAAAATAT  
TTCAATGAAACATGGAATTTGA  
>Vwf|ENSMUST00000112254.7|Reference\_end location: chr6(+): 125686672  
site\_id: 1296323, AMPLICON  
AGCAAAGCTGTGTACTCCATTGACATCGAGGATGTGCAGGAGCAATGCTCCTGCTGCCTG  
CCCTCGAGGACGGAGCCCATGCGCGTGCCCTTGCACTGCACCAATGGCTCTGTGCTGAC  
CAGGAGTCAACGCCATGCAGTGCAGGTGTTCTCCCGGAACTGCAGCAAGTGAGGC  
CTGTGCAGCTACAGCGGATTCCTACTGATAACCCATGCTATGACCTGGCTATCCAGAAAAC  
CAGATCCCTCCCTTGGGCCTCTGACCTTTGTGCCCTCTGGGCCACAATAAAGGCCAA  
GTTCTCATC



>Wls|ENSMUST00000068952.9|PolyA\_1 location: chr3(+): 159935051 site\_id: 1280494, AMPLICON  
CTTTGCAGTCCAACATTTGCTGATGTCATAGTCTTTTTACTCTCCTCCATGGGCACTTTT  
TTCTATTTATATACCAAGTAGCCAAATGAGTTATTTAAGTTGTCAGTACAAATATGTCA  
ACTTTTTAAAAAATGGATTACTATAAAAATAACCAAACCTCATGAGAAATTTTATCTTACC  
AGAGGCATTTTCAGCTTTGGAACCAAATCTGTGTATTTGATACTAATCTGTCTGTTTGT  
GTGGATTTTGAGAAATATTTGCTTAACCTACCCAAATAGGATTTCTGGTATTTAAATGG  
>Wnt1|ENSMUST00000023734.7|Reference\_end location: chr15(+): 98793837  
site\_id: 476702, AMPLICON  
CCACGCGTTCGGTTATGTAAATAAACTATTTATTGTGCTGGGTTCCAGCCTGGGTTGCA  
GAGACCACCTCACCCACCTCACTGCTCCTCTGTTCTGCTCGCCAGTCCTTTTGTATC  
CGACCTTTTTTCTCTTTTACCCAGCTTCTCATAGGCGCCCTTGCCACCGGATCAGTATT  
TCCTTCCACTGTAGCTATTAGTGGCTCCTCGCCCCACCAATGTAGTATCTTCTCTGAG  
GAATAAAATATCTATTTTTTATCAACGA  
>Wnt10a|ENSMUST00000006718.14|Reference\_end location: chr1(+): 74804171  
site\_id: 1263961, AMPLICON  
CGTCATCGGGCTGAAGTGACTCTAAGGGCTCCAGACCTCTGCTCCTGTCTTTCACTTAA  
AGATATTTATTTTTGCGCTCTCTTTGAGACACTCTCTGGGGAAAAGAAGCTCCgagatc  
tacaggctgattaaggacatggacaataaaccagtaaaca  
>Wnt10a|ENSMUST00000006718.14|PolyA\_1 location: chr1(+): 74803900 site\_id: 399696, AMPLICON  
TGGGTCTCAAGAATGGTTGTCTCTTGGTGCCTGGCTTCTGCCGCTAGCGGATCTGAGCC  
AGGCAGCAAGCAGCAGCCTTGGCTCCTGAGAGAGGTGGTTGGCTCTTACAGCCCCGAGGG  
TCTACAATCACCAGACAGTCCAGATCTGATTGACATTCTCCGCTCACCTCTGTAGGTT  
CCCTCTTTCTGTTTCTAGCTCAGACAGCTGGGGGTGATAGTGGAGACTGTTCCACACCCT  
AGGACAGGTCACCAAAGCAGCCC  
>Wnt10b|ENSMUST00000023732.11|Reference\_end location: chr15(-): 98771752  
site\_id: 476697, AMPLICON  
GGTTCTCAAACCTCTCCACTACAGCCCAGAACCTCCTCTTATGGGACCTCGGGTGACAAT  
AATGAGAGGTTTTTCGGTTGGAAAAGGACAGAGGGCAGGGAAGCCTCAGACAGCTGTCTTG  
TCAGGCTCTTGGGAGGCTTCTCCTTCCGTTTCTGTTGAAAGGGTCTCTCCAAAGGAAA  
GGTTTTAGCCATAACTCTTGGAGGCCCTTTTCTTCTTCTCAGCAGGAAGGGTGGGAAATGGA  
TAATTTATTTTACTGAGATGTGTTCTTGGTTCTGTTTGAACCTAAAATAAATTAAGTTA  
CTGAACTACTGG  
>Wnt10b|ENSMUST00000023732.11|PolyA\_1 location: chr15(-): 98772238  
site\_id: 476698, AMPLICON  
TCGTTTCCACTGGTGTGTTATGTGCTGTGTGATGAGTGTAAGTCCACAGAGTGGGTCAA  
TGTGTGTAATGAAGGTGAGCCTCGCCTAGGCACGACGAGGAGGAGAAGCACTGTGTGAG  
GGCTGCTCTTTTACGCCCTTTGCTCGGATTTCTGTCTAGGGTTTATCGTGGCTCCCGGA  
AGCTCAGAGCATCTGCCTGAGAACAGCTCTGGGGGTGAGGGTCCAGGTGAAATCTGTAAC  
GAGCAGCCTTTTGTGGGGGAAGTGGCCCCACACTCTGTTCTTAAACACTCGAATAGACTA  
AGATGAAATGC  
>Wnt11|ENSMUST00000067495.8|PolyA\_1 location: chr7(+): 98853811 site\_id: 1302580, AMPLICON  
CCACATGGAACCTAATACTTGGGTTGTAAATTTTTATTTTCTTCCCCTCTCCGTGGGAT  
GTGGGAGTTACAGAAATATTTATAAAAATACAGCTTTTTCTTTGGGGTGGCTCACTTCAA  
TCCCTCTTtatatatatatataataatatataatgattatatatTT  
>Wnt16|ENSMUST00000031681.9|Reference\_end location: chr6(+): 22298522  
site\_id: 431083, AMPLICON  
CGTGAGAGGTGTGAGTGTAAGTTTATCTGGTGTGCTACGTCCGCTGCAGGAGGTGTGA  
AAGTATGACCGATGTCCACACGTGTAAGTAACCTCTCCGTCCAGCCTAGCATGAGACGCC  
TCTGTAGTAACCAAGGTGTGGTGTGGCATCTGGAGGGCGCCCTACTGTGCACTGATGG  
GGAAGTCGCTGCCTGTAAGAGTGTTCACAGACCCCTGGGCTAGTCTACGATTTCTTTCTT  
TCTGGCAGGCTTCAAATCACAAGCTGATCCAGAGGATTGCTTGGGATTCTGAAGTTGAAA  
AGGTGGCAGTCGCCTTTGGATGATTTGGGAAATATACATTGATATACAGGAAACATCAA  
ATCTGTTTCTGAAGCAATGTGG  
>Wnt2|ENSMUST00000010941.5|PolyA\_1 location: chr6(-): 17989246 site\_id: 431013, AMPLICON

CACCTATTCTGTCTATCTTGGGCATTCTGATGTCACCTCTCTCCTGCTGATTTCTTTT  
TGGAAATGGCATGACAGGCTGTTAGAGGAGGAGGGTCATAGCCCCCACCCTGTCACCT  
AGACATTTCTCTTTGGCTGCGGGGAGAAACATCACATAGCGAAGGAACCTCCTCTGTGT  
TTTCCAGATTCCAACAACCCAGAAAGTCTGTGTTTCCCTGGGGCGCGGGGTAGGGATGG  
AAAGCAGAATGAGCTGACACCAAATTTCCCTCGGATTTTTTTAAAAAAGAGTAAGCAAG  
GGCTTAACTAAGTGATAGCTGTTGATAGCATCCTTGGTGACTTTCTAGAGAAAGATGGC  
TTCCAATAAACATCAGGTTAAAAAC  
>Wnt2b|ENSMUST00000029429.5|Reference\_end location: chr3(-): 104945272  
site\_id: 415647, AMPLICON  
CCGACTGATAGACGTCATCAACACTCTCACTGGTCAAGTACTTCCCTGCTTCTCTGGGACC  
TTCTGATTTAGGGCTGTCTGGGCAGACAACAGACTAGATTCAAAGGCTTTCACAAGGAAT  
TCTGGATATAGCTCCTCTCTCTTCTCAGGTTCCCTTTCATCCAATCGTACTCTCAGAT  
GTTTGTGGAGCAACCTCTTTCTGCCAGGCAGCAGGAggctggggtggggtggggtgggg  
gggCACAGCTCTGGCCACAGAGGCAGATTTATTTGGATGATAGGACTAATATTTGTGTAA  
CCTGCTG  
>Wnt3|ENSMUST0000000127.5|Reference\_end location: chr11(+): 103817957  
site\_id: 464453, AMPLICON  
AAGTCATGTTTCCGGGGCGTATTCAAGTAGCTGACAAGTAATTATTTAATAATAGTACAT  
GAGCGCATTGTAATTATCCTCGCCATAGTCAGGTAATAGCATCCAATGGGAGGTCCCTAC  
CAACCTGCTGTATCCAAAGTTTTGTAAAAAGTTGTAGAAGTTGTTGATCTTTTTTGATTTT  
ATATTCAAAAAGTCTCTTTTTTATAAATATTATTTATTATACAATGTATATACCTTTGAGT  
TAACTAAGATTatataattatataaataatataatataatT  
>Wnt3a|ENSMUST00000010044.7|Reference\_end location: chr11(-): 59248033  
site\_id: 461067, AMPLICON  
TCTGCCACAAGAGCTTCCCTGATTGGTACCCTGTGAACCGTCCCTCCCCCTCCAGACAG  
GGGAGGGGATGTGGCCATACAGGAGTGTGCCTGGAGAGCGCGGAAAGAGGAAGAGAGGCT  
GCACACGCGTGGTGACTGACTGTCTTCTGCCTGGAACFTTGCCTCGCGCTTGTAACTTT  
ATTTTCAATGCTGCTATATCCACCACCCTGGATTTAGACAAAAGTGAttttctttttt  
ttttttcttttcttttCTATGAAAGAAATTTTTTAGTTTATAGTATGTTTGTTCAAAT  
AATGGGGAAAGTAAAAAGAGAGAAAAAATAA  
>Wnt4|ENSMUST00000045747.4|PolyA\_1 location: chr4(+): 137299497 site\_id:  
422350, AMPLICON  
CTTCTACCTGAACCACTCTCTACTGTTGTTGTCAACAAGGCAAAGTGGCATTCCCTCCT  
CCAAGGCCAGGGCTGGAAAAGCCAGCTCCGGATGCTGCTACTCTACCGTGCTGCCCCACC  
CCGTCTCCAGTTTTTATATGAGGCTCCTTGGCATTGTGACATCCCCACGGCATAGTCTG  
AGATGCACGATAAAAATGGTTATTTCTC  
>Wnt4|ENSMUST00000045747.4|PolyA\_2 location: chr4(+): 137296856 site\_id:  
422351, AMPLICON  
CGTGCAACAAGACATCTAAAGCCATTGACGGCTGCGAGCTACTGTGCTGTGGCCGCGGCT  
TCCACACAGCGCAAGTGGAGCTGGCCGAGCGCTGTGGCTGCAGGTTCCACTGGTGTGCT  
TCGTCAAGTGCCGGCAGTGCCAGCGGCTCGTGGAGATGCACACGTGCCGGTGACCATGCC  
GTCTGTGCCAGGACCACCTGCGTGGCCAGGGAAGGCCAATAACTTAAACAGTCTCCCA  
CCACCTACCC  
>Wnt5a|ENSMUST00000063465.11|Reference\_end location: chr14(+): 28527440  
site\_id: 1327366, AMPLICON  
TTCCCTCTCTGGTGGAGCTGTAAACAAGATGGCATGTTGTGAAGGTTCAAGATGATTTT  
TTTTTAAATCGCAGAAACATTTAGACACCTAAGAACTAAAACCTATAAAAGGGATCTTTG  
AATTTGCCTGTTAACATGGATTAATGTTTACACTTACAGCTGATGATTGGACGGTGT  
ATGTTAGGGAAATGCCTTGTAAACGAACCTCATGAAGCAGATGTAATTAAGGTTGATGT  
GAGCCAATCTAGAAGGTTGAACAGTGTTTTCAAAGAACGGAGAGACTTACATTTTAGACC  
AATCTTTATACATTTTGTGAGCTAGAAAGGAGATAAAGATTATTTATTTTGTTCATAT  
CTTGACTTTTCTATTAATAATCATTTTA  
>Wnt5b|ENSMUST00000117171.7|Reference\_end location: chr6(-): 119432535  
site\_id: 434942, AMPLICON  
GCTCCTGCCTCAAGCTCTTGTGCCAAGAGAAAGACGGTCTGTACCTGCTACAGCCAGG  
AAGACGTGGAGCAAACCTGGGATTTGACTGGGGACCAAGTGCCTGTTGCACAGGACAGGA  
ATCTGCTGTCACTCTGTCAAGGGAGGCTTTGAGAATGACAGGGCATGCTAGCAGGTCAGG  
TCAACTGCCTGTGAGACTGTCATCTCTGCCACATGTACAGCGTCCCTTTGACATTAAT

ATCTTTTTACTG

>Wnt6|ENSMUST0000006716.7|Reference\_end location: chr1(+): 74785319  
site\_id: 399664, AMPLICON

ACCTTTAGCACACCTTCTGTCTTTCTTGGCTCTCGAGAACTTGTGGTCCCATGTAAAG  
GAACACAAAGAGGCCAGAAGCTTCTAGTAGTGGCTTAGTTGTCAGGCGTCTGTGTGAAC  
TTTTATGGCATTCTGTCTTTCTGTGACTCCTGATGAAATTAACGGTCATGAGATTAAG  
CTCGTCATGAAGTGTAAAATGCAAC

>Wnt6|ENSMUST0000006716.7|PolyA\_1 location: chr1(+): 74784945 site\_id:  
399665, AMPLICON

TGAAAGGCCCTTTGCTAGTTCCTGCAGGAGATCACTCCCCTTGGCCCCCAGATGGAAAT  
AAAAAGCCAGACTCTGCCCTCTGGAAATAATATTCCTCAGAATTACTGGGATGGATGGG  
TGAGTTTAGTATCAATAAAGACATTTAAATCC

>Wnt7a|ENSMUST00000032180.6|Reference\_end location: chr6(-): 91363995  
site\_id: 434093, AMPLICON

CACTTGTGGTCTCAGGGGTTATTTCCAGGTATCTGCATTTGTGGGTGGGGTGCAAGGTAG  
ACAGCAGGGAAGTATTTGATTGTGTTGAGCCACAGTGAGACTGCAACTCTGAACTCTGT  
CTCCACAGCTGCTGGTGAAGCTCAGATGCCTGTGAGACAACAGCCCTGAGCCTCATGGCC  
CACATGCTGGGAGCCCCTCAGTGTCTAGGTTCATGTCCAGTCCCCCACCTGGGTTACATCA  
CGACCAATAAACATGGCTGTATGGCTGAT

>Wnt7b|ENSMUST00000109424.3|Reference\_end location: chr15(-): 85535439  
site\_id: 1330624, AMPLICON

CCCTGTCTGTCTGTCTTAAAGTTATTGTGACCTACACTGGGTACCGGAGGGGATGGGG  
GATGGCTTCAGCTGCTGTCCCCAAGCCAGGCTCCTCCTTCTGCTTGAAACAGACCCTCG  
GGGCCCCCTGATGCCACCGAGGCAATTCGCACTGTCCCTGGGCTGCCAGGCACCTGCGCC  
TGCACTCGGTGAGCCGAGACCTTGCCCTTGGGGGAGAGAGGTGGTTAGTGGACCCAGGCA  
GGGCACTGGCTGTCCCAATGCTGTGTGCTGGGGTGGAGGTGGCCGGGCACCACATGTCCT  
TGAAAGTGCCCTACTTCTGATGGGCTGTGTTTCTGCCTCCTCTGGAGGGGAGCACTTAGCC  
CCAATAAAAGCTGGAATCAGAAAAGCA

>Wnt8a|ENSMUST00000012426.2|Reference\_end location: chr18(+): 34548273  
site\_id: 483847, AMPLICON

CTTTCCTGCGCAGTTACTCTTGGACTTAAGCAGCTTGTTAAAGAGGGAGTTTGATTTGGG  
TGCACATTCAGAGGAGCCTGGAAGAACCGTATTCCATTAAGTTTCAGATACCGTTCCACC  
CAGCTGTGCTGCTGGGAGTGCAGGGGAAGAGAAGTTAAAGGAAAGGAATTCTGggggcgg  
gagagatggctcagtggttaagggccctggctggccctccagaggactggctcacttcac  
agcaccacttgatggctgtgagccatctgtacttctagttccaggggatccaatgtcct  
tgcctggtctctgtgaccaccaggcacaatgtgcacagacagacatttatacatataaa  
ataataaagtaaaaACTTACATTT

>Wnt8b|ENSMUST00000041163.4|Reference\_end location: chr19(+): 44514273  
site\_id: 486906, AMPLICON

ACTCCAGTTCATCCCAGTTCTACAGAGAACTTCTGCCATGCACTACGCCTTCAGCCT  
TTGTTACAGCTATACACTGGAGTGGAGACAGCTAACAAACACACAAGCATCCTTCAGTT  
CACGGCTTCATGTCCTACTAACTCACTGAGACTCTGCAGACAACTCTAGAGCTGCTGA  
CTGCTGACTGGGAAGATTAGACACCTCTGAGGTGAGCTAGTCAAACCTTTaac

>Wnt9a|ENSMUST00000108783.3|Reference\_end location: chr11(+): 59333542  
site\_id: 461069, AMPLICON

GTCTTCTGGATGAAGCAACTCCCGCAGGCCAGAGCCTCTTTGATCTTCTTCTATGGGCA  
GCAGAGTGAGCAGCTGCCCTGCTCCCGCCGGTCTGCCGGCCACCCAGGTTAAGCCGGTA  
CAGCAGTGGACTCACAAGGGAGCTGTCTTTGTGTGGAGTCTTGTGCAGCCTGTGATTTCT  
CTACCTCAACTGTGTGGCGAGTAGGTGTGAACCTGAGTGACTGCAGAGAATGTATTTATT  
TAACAGCTTTGTGTAACAAAACCAGAAAACAAATGGAAACACTAAATAAATGTATTTAAA  
TT

>Wnt9b|ENSMUST00000018630.2|Reference\_end location: chr11(-): 103727364  
site\_id: 464452, AMPLICON

TCTCAACCCCATGAACGTCCATGCTTCTGTCTGAGCACTGAGGAGAACCCAGCGGAG  
CTCATTTGTTAGTGTGGAATACCCATCCCCCTCCCGTTGATtatttagggagtgtctg  
ataatgccaggggatactctgggtgctagggcgagaagtacttaagagcaagtcccagc  
ctcaggggacttatatgcccggcgaggagaaagccaacaacccaataaaCTATGCACTGGT
